# Supplementary material for: Extending the spectrum of CLRN1‐ and ABCA4‐associated inherited retinal dystrophies caused by novel and recurrent variants using exome sequencing
Source: PubMed Central journal article supplement — Mol Genet Genomic Med. 2020 Jan 22;8(3):e1123. doi: 10.1002/mgg3.1123 (PMC7057102; doi:10.1002/mgg3.1123), 2020-01-22

## F1: IV-7 (OD)

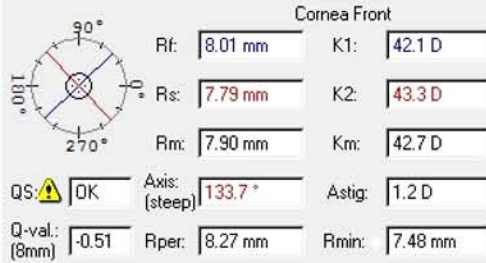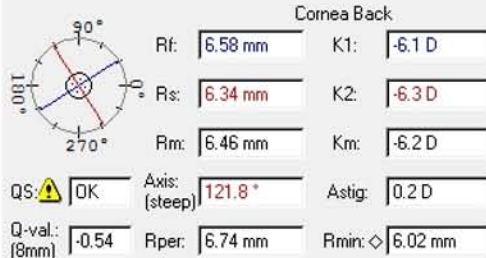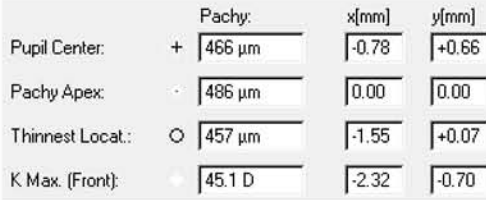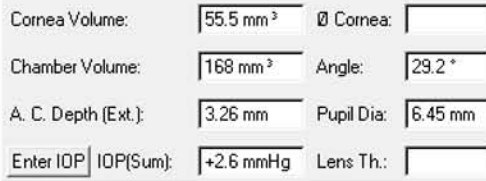

### Refractive

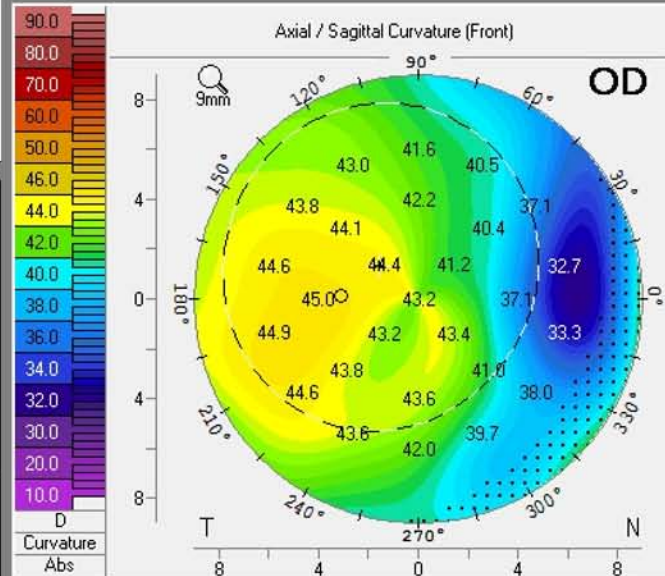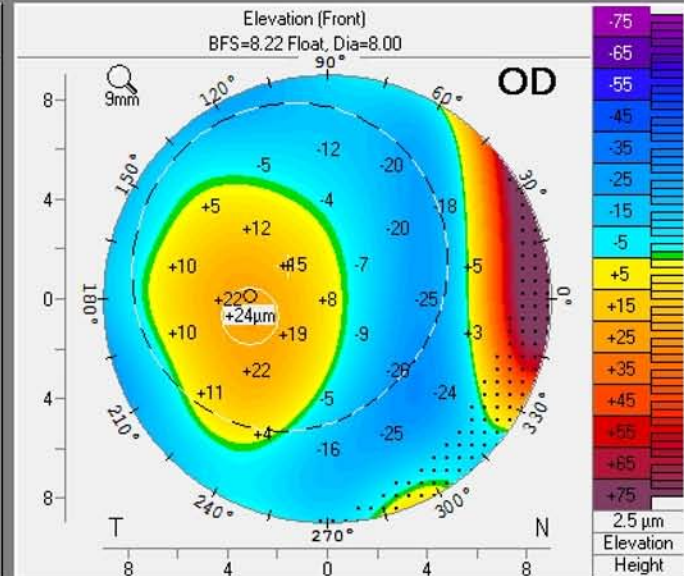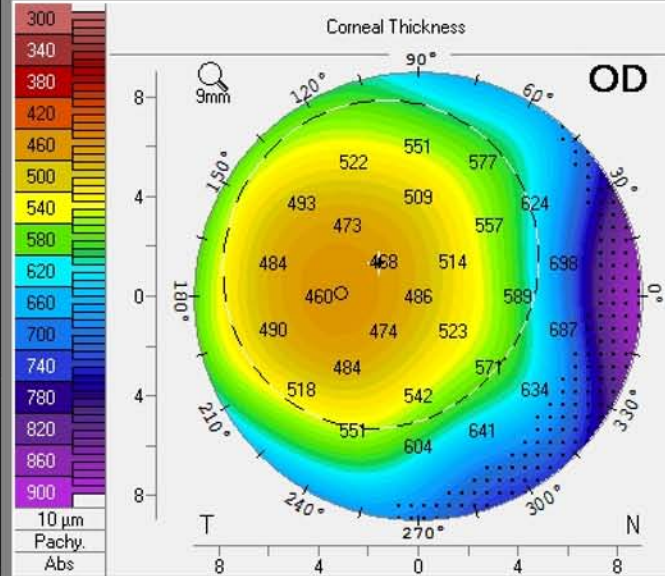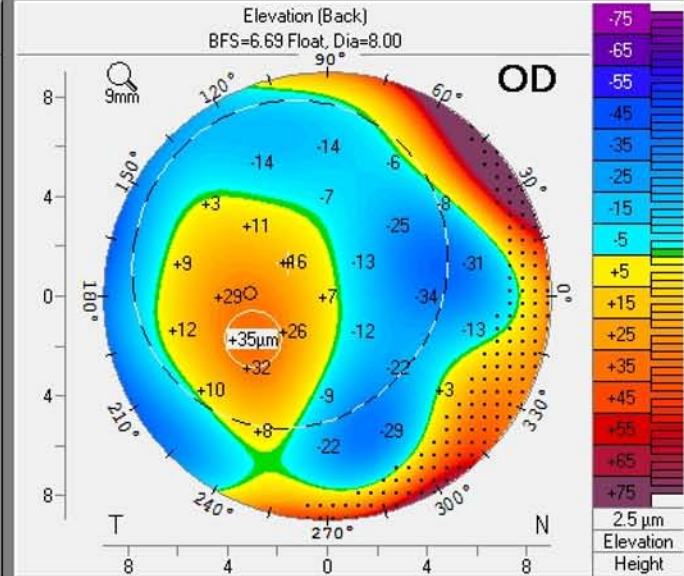

## F1: IV-7 (OS)

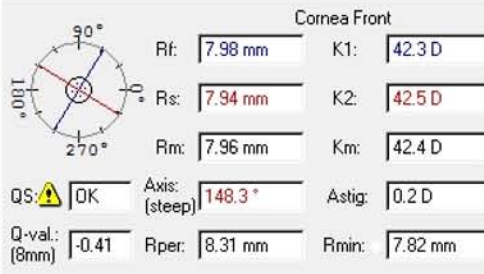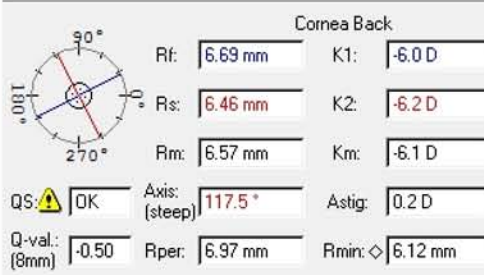

|                     |           |            |                      |       |         |       |       |
|---------------------|-----------|------------|----------------------|-------|---------|-------|-------|
| Pupil Center:       | +         | Pachy:     | 487 μm               | x[mm] | -0.55   | y[mm] | -0.08 |
| Pachy Apex:         | -         |            | 494 μm               |       | 0.00    |       | 0.00  |
| Thinnest Locat.:    | ○         |            | 474 μm               |       | -0.88   |       | -1.01 |
| K Max. (Front):     |           |            | 43.1 D               |       | -2.36   |       | +0.07 |
| Cornea Volume:      |           | ∅ Cornea:  | 55.3 mm <sup>3</sup> |       |         |       |       |
| Chamber Volume:     |           | Angle:     | 159 mm <sup>3</sup>  |       | 28.3°   |       |       |
| A. C. Depth (Ext.): |           | Pupil Dia: | 3.22 mm              |       | 6.38 mm |       |       |
| Enter IOP           | IOP(Sum): | Lens Th.:  | +2.2 mmHg            |       |         |       |       |

### Refractive

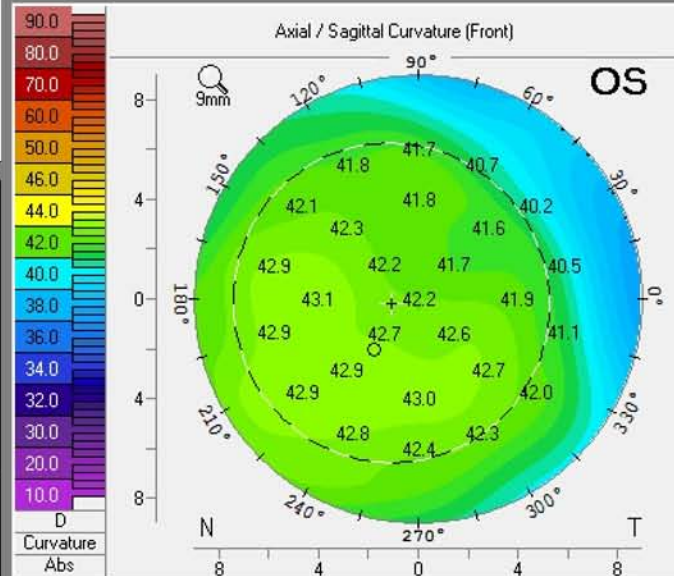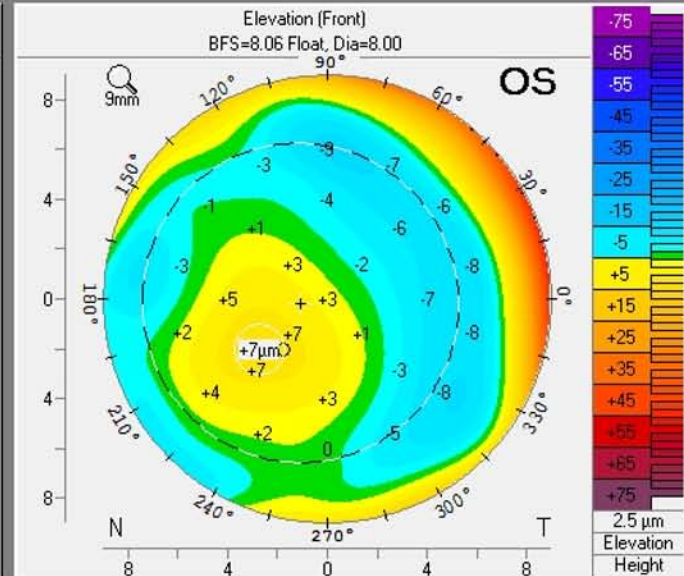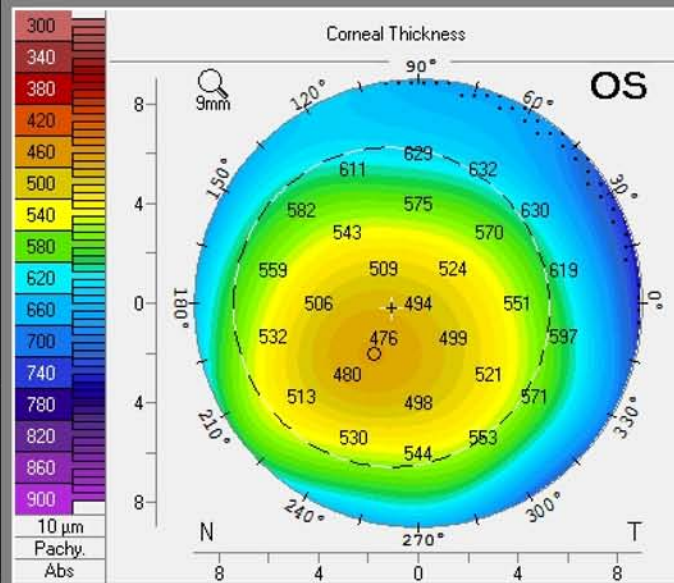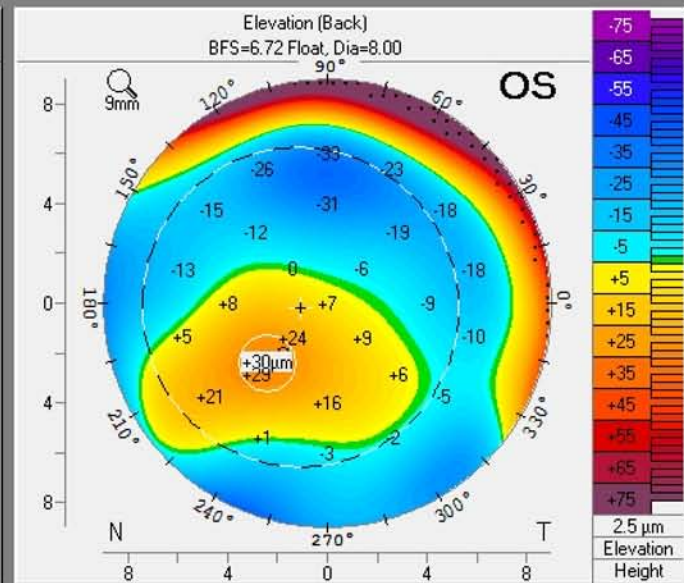

## F1: IV-8 (OD)

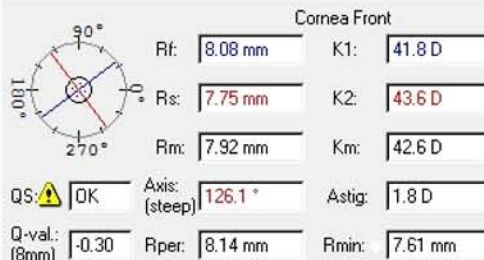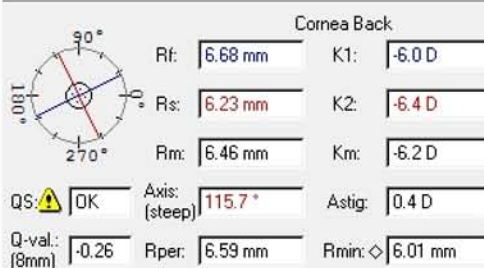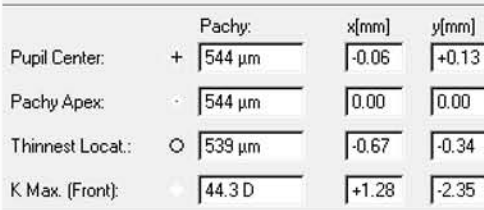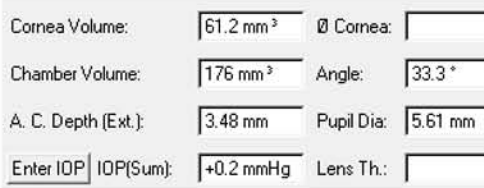

### Refractive

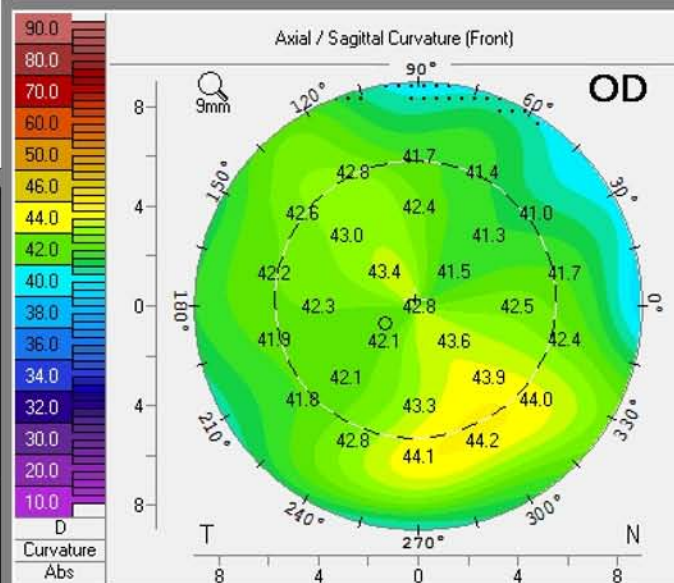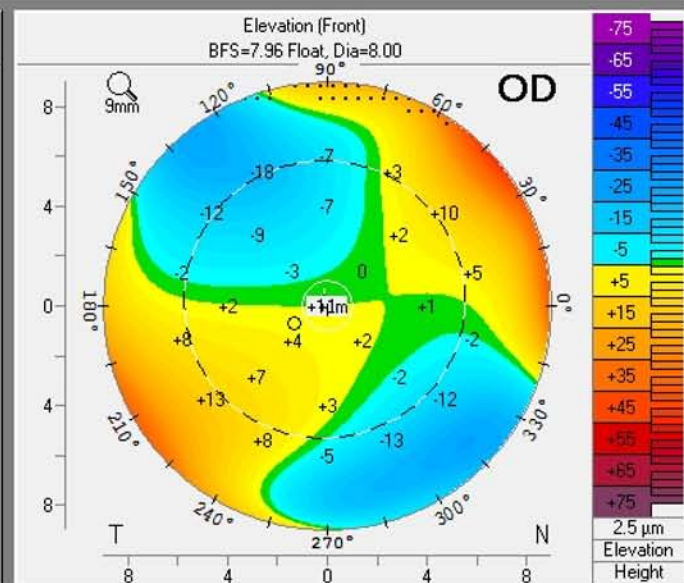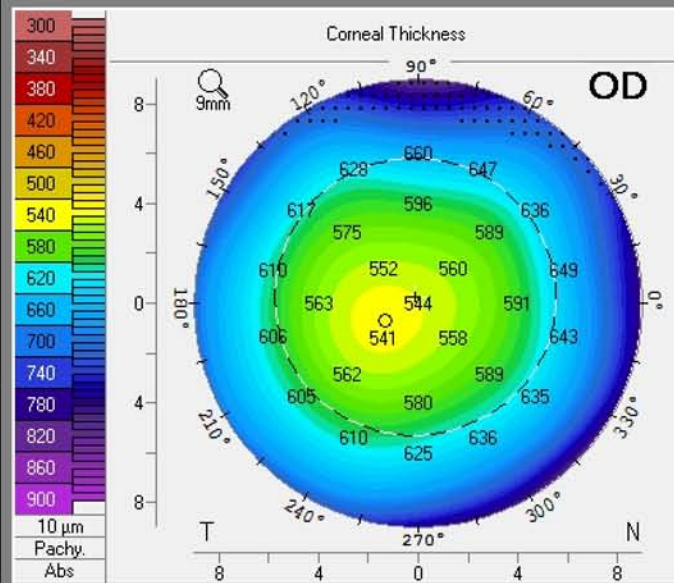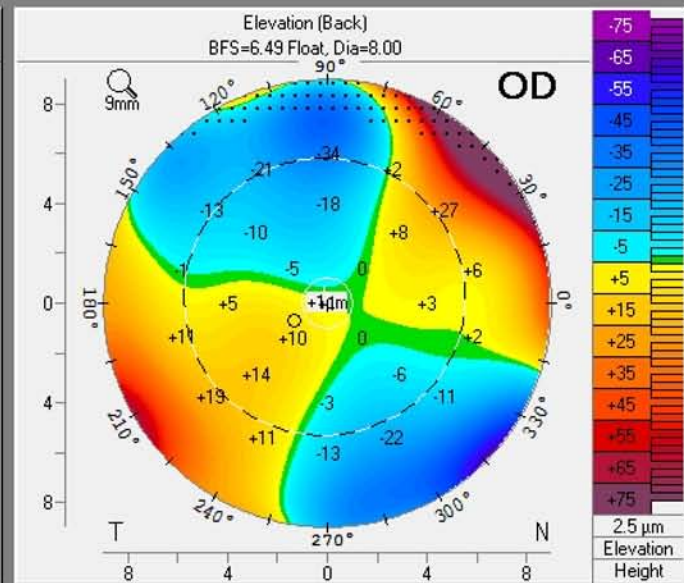

## F1: IV-8 (OS)

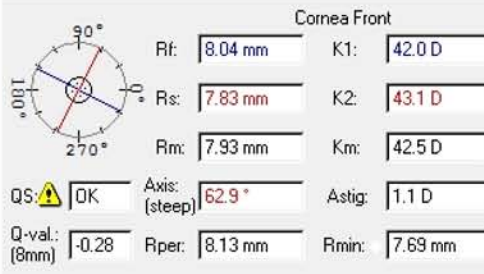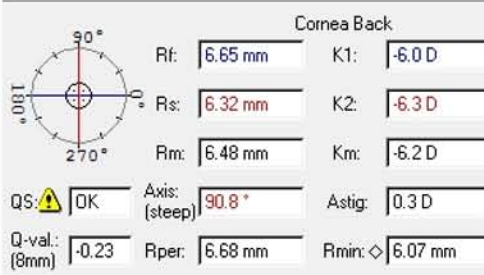

|                     |           |                      |            |       |       |         |
|---------------------|-----------|----------------------|------------|-------|-------|---------|
| Pupil Center:       | +         | 527 μm               | x[mm]      | -0.47 | y[mm] | +0.22   |
| Pachy Apex:         | -         | 527 μm               |            | 0.00  |       | 0.00    |
| Thinnest Locat.:    | ○         | 521 μm               |            | -0.67 |       | -0.47   |
| K Max. (Front):     | +         | 43.9 D               |            | -0.13 |       | -2.75   |
| Cornea Volume:      |           | 59.4 mm <sup>3</sup> | ∅ Cornea:  |       |       |         |
| Chamber Volume:     |           | 171 mm <sup>3</sup>  | Angle:     |       |       | 30.6°   |
| A. C. Depth (Ext.): |           | 3.49 mm              | Pupil Dia: |       |       | 5.83 mm |
| Enter IOP           | IOP(Sum): | +0.9 mmHg            | Lens Th.:  |       |       | 3.41 mm |

### Refractive

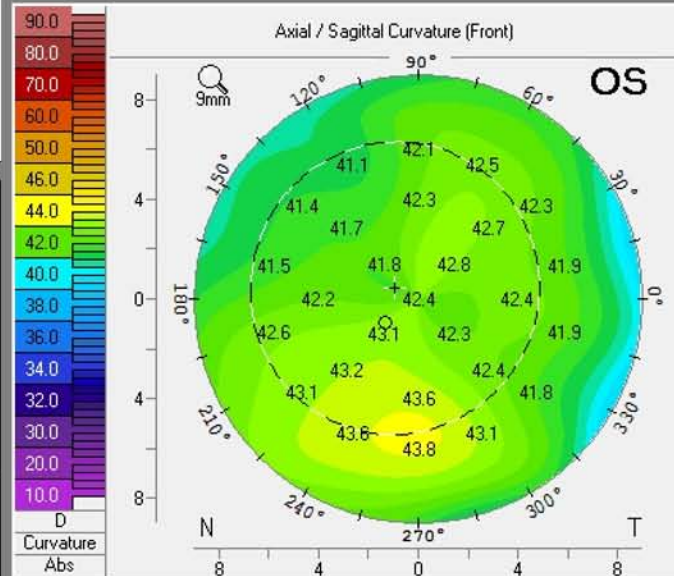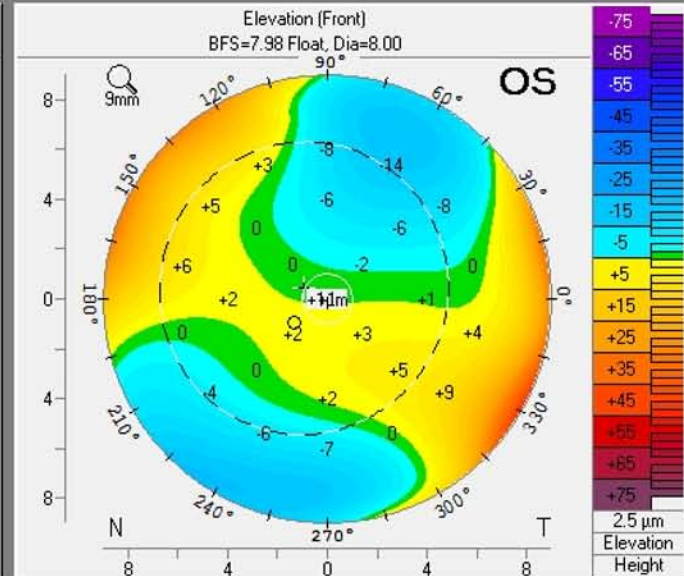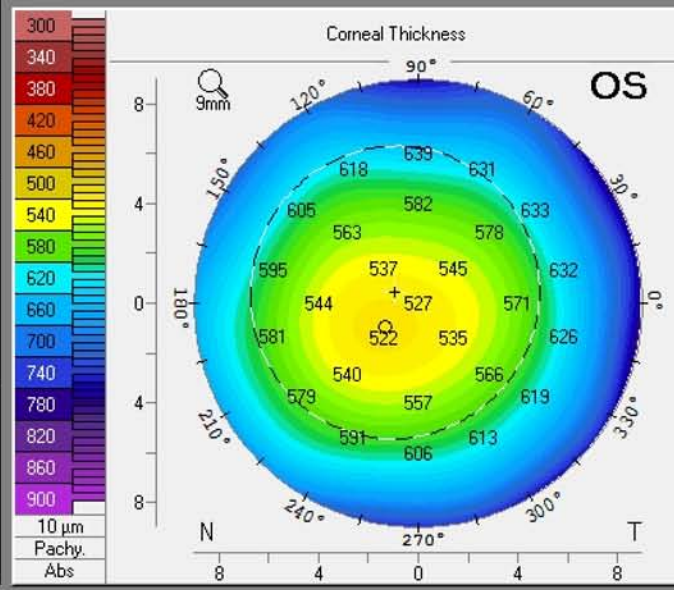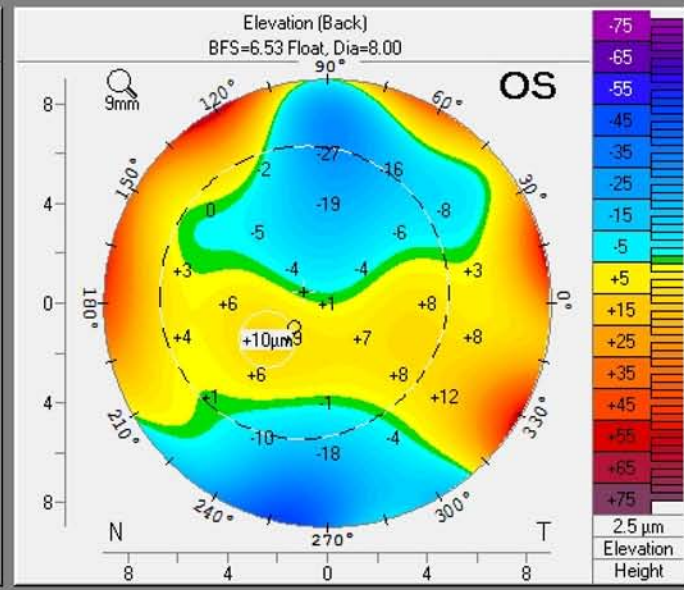

## F1: IV-16 (OD)

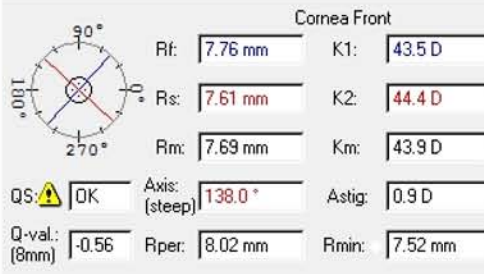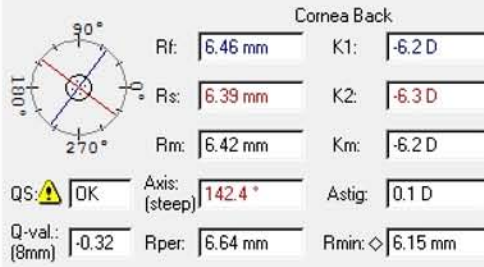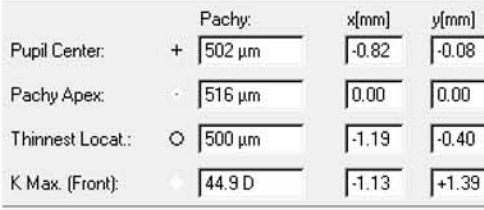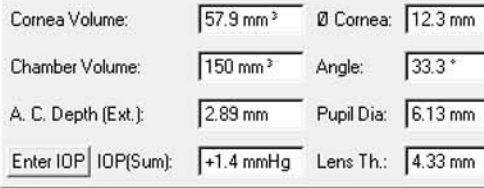

### Refractive

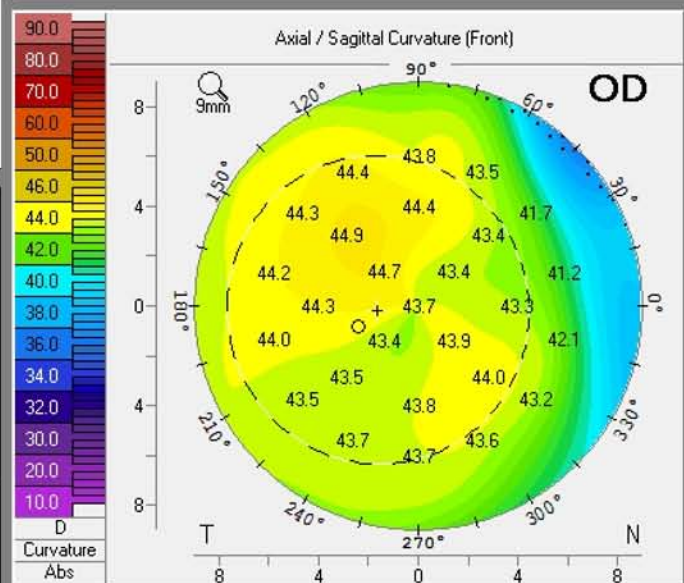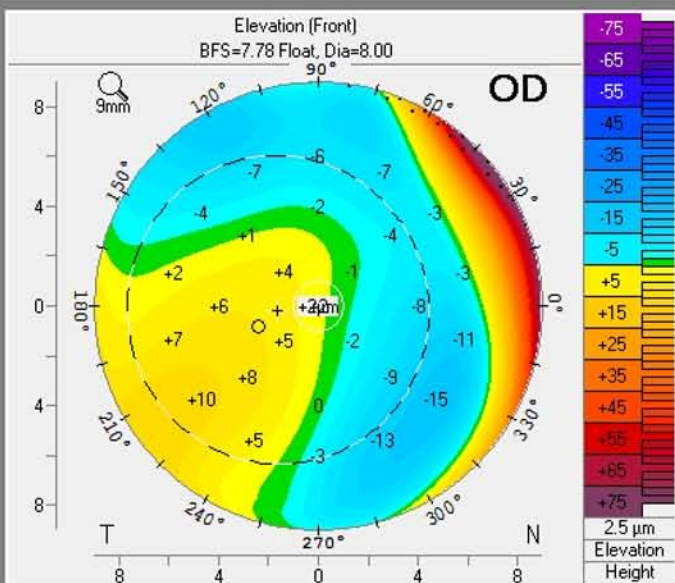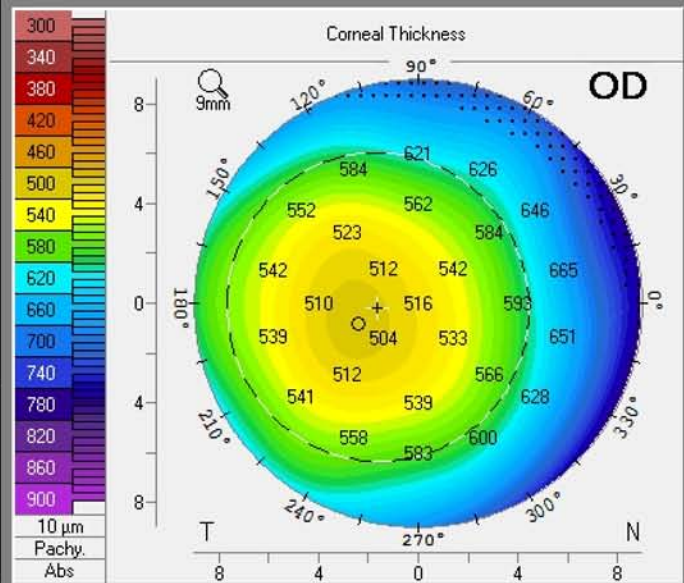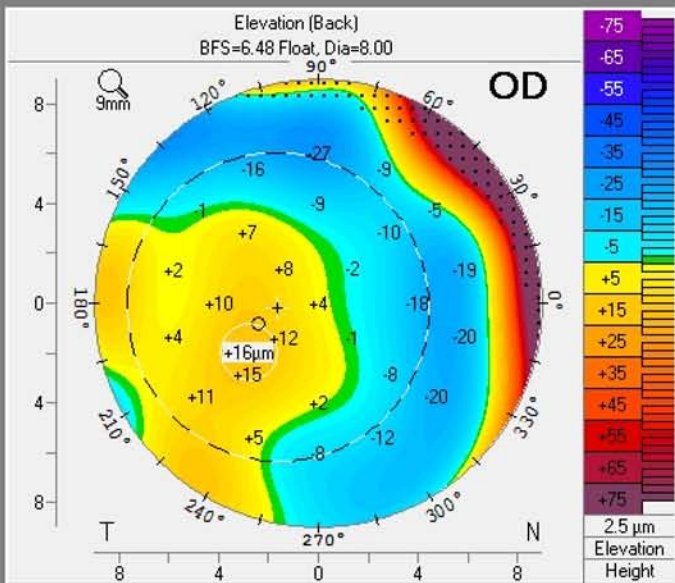

## F1: IV-16 (OS)

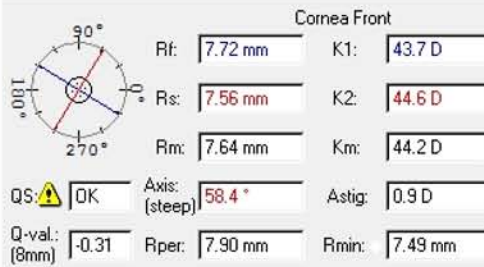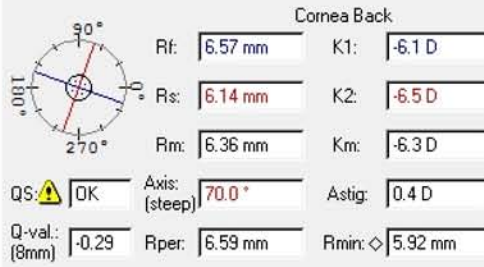

|                     |                      |            |         |       |       |
|---------------------|----------------------|------------|---------|-------|-------|
| Pupil Center:       | + 510 μm             | x[mm]      | +0.15   | y[mm] | -0.16 |
| Pachy Apex:         | 513 μm               |            | 0.00    |       | 0.00  |
| Thinnest Locat.:    | 502 μm               |            | +1.02   |       | -0.75 |
| K Max. (Front):     | 45.1 D               |            | -1.69   |       | -1.49 |
| Cornea Volume:      | 58.0 mm <sup>3</sup> | ∅ Cornea:  | 10.7 mm |       |       |
| Chamber Volume:     | 148 mm <sup>3</sup>  | Angle:     | 26.2°   |       |       |
| A. C. Depth (Ext.): | 2.91 mm              | Pupil Dia: | 6.31 mm |       |       |
| Enter IOP           | IOP(Sum): +1.5 mmHg  | Lens Th.:  | 4.76 mm |       |       |

### Refractive

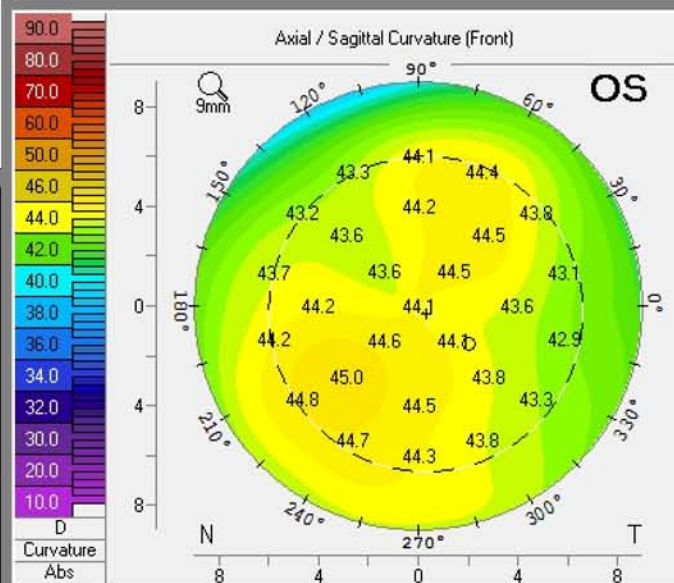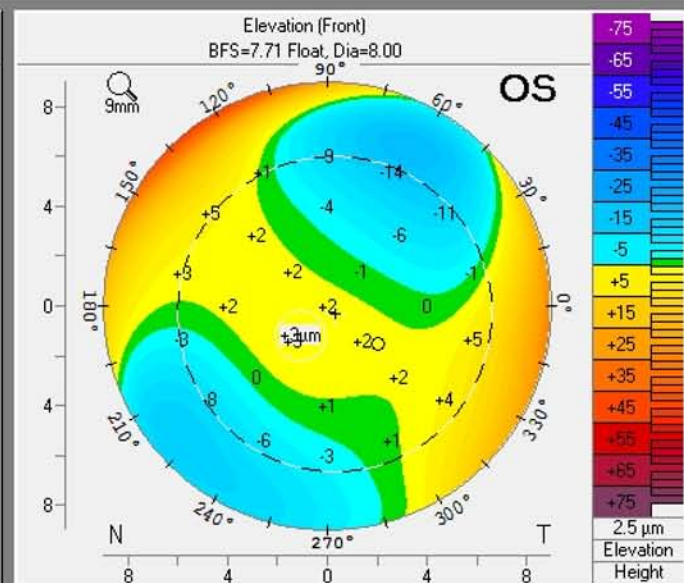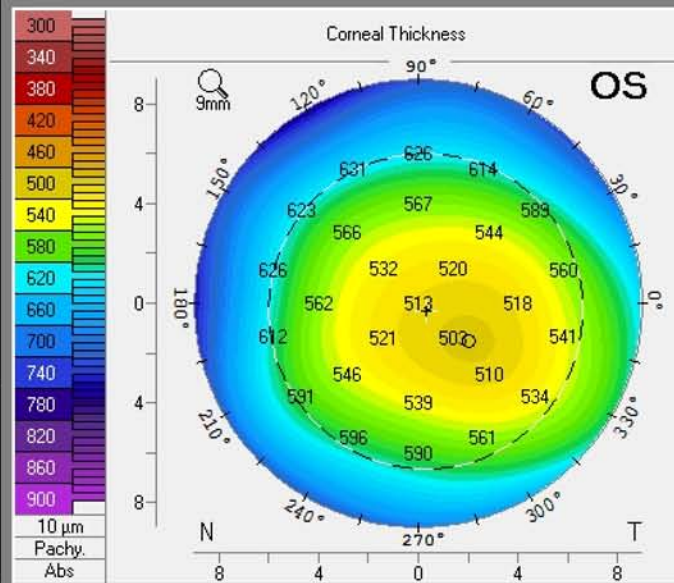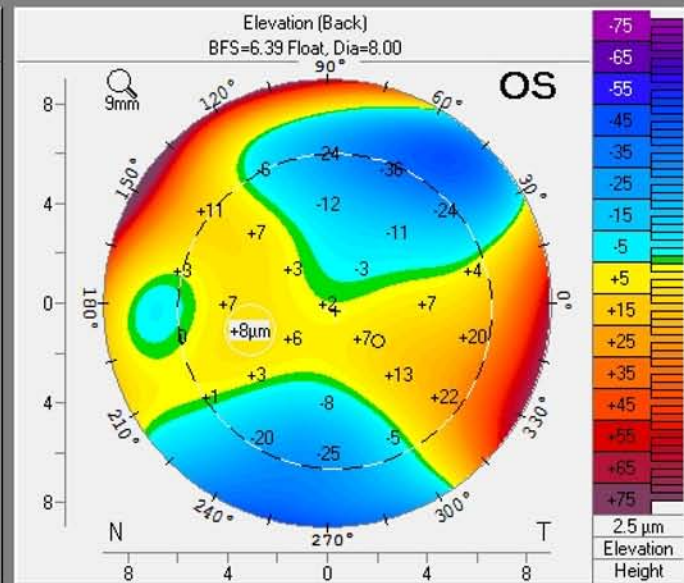

## F1: IV-17 (OD)

| Cornea Front  |         |        |         |
|---------------|---------|--------|---------|
| Rf:           | 8.00 mm | K1:    | 42.2 D  |
| Rs:           | 7.69 mm | K2:    | 43.9 D  |
| Rm:           | 7.84 mm | Km:    | 43.0 D  |
| Axis: (steep) | 142.6°  | Astig: | 1.7 D   |
| Q-val: (8mm)  | -0.33   | Rper:  | 8.11 mm |
|               |         | Rmin:  | 7.65 mm |

| Cornea Back   |         |        |         |
|---------------|---------|--------|---------|
| Rf:           | 6.67 mm | K1:    | -6.0 D  |
| Rs:           | 6.42 mm | K2:    | -6.2 D  |
| Rm:           | 6.55 mm | Km:    | -6.1 D  |
| Axis: (steep) | 133.6°  | Astig: | 0.2 D   |
| Q-val: (8mm)  | -0.36   | Rper:  | 6.88 mm |
|               |         | Rmin:  | 6.25 mm |

| Pachy            |          |       |       |
|------------------|----------|-------|-------|
| Pupil Center:    | + 496 μm | x[mm] | -0.60 |
|                  |          | y[mm] | +0.02 |
| Pachy Apex:      | 504 μm   |       | 0.00  |
| Thinnest Locat.: | 492 μm   |       | -1.00 |
|                  |          |       | -0.43 |
| K Max. (Front):  | 44.1 D   |       | -1.07 |
|                  |          |       | +0.79 |

|                     |                      |            |         |
|---------------------|----------------------|------------|---------|
| Cornea Volume:      | 55.1 mm <sup>3</sup> | ∅ Cornea:  | 11.8 mm |
| Chamber Volume:     | 196 mm <sup>3</sup>  | Angle:     | 38.6°   |
| A. C. Depth (Ext.): | 3.19 mm              | Pupil Dia: | 6.76 mm |
| Enter IOP IOP(Sum): | +1.8 mmHg            | Lens Th.:  | 4.64 mm |

### Refractive

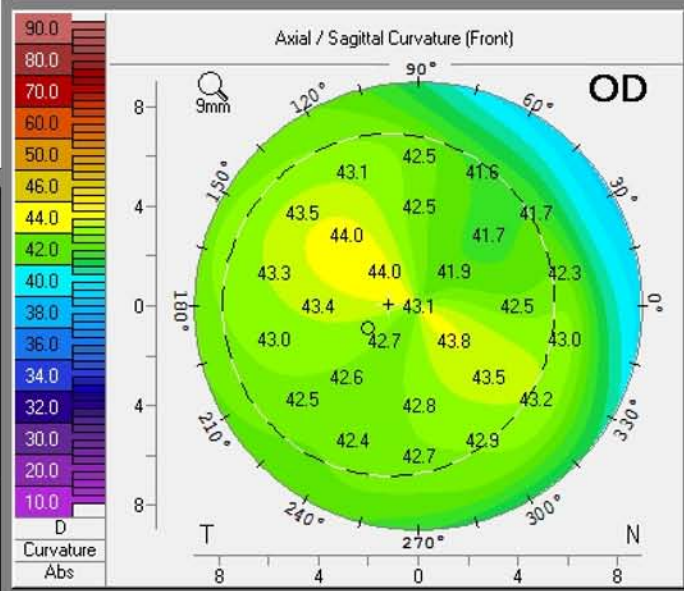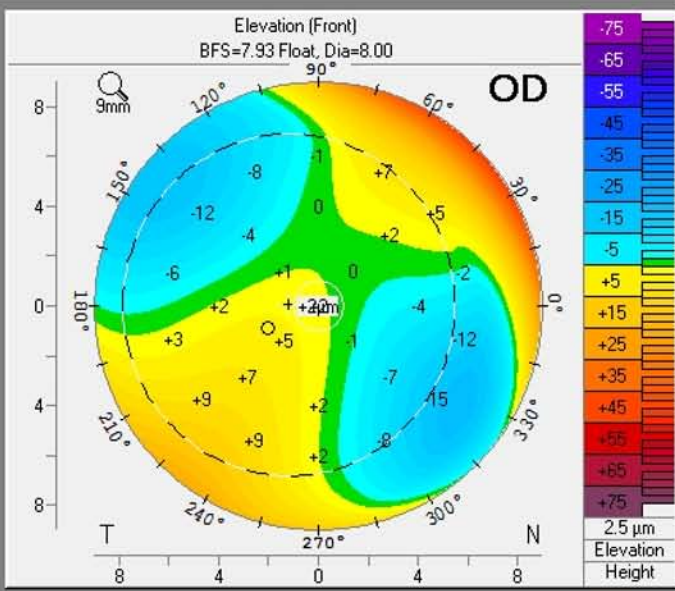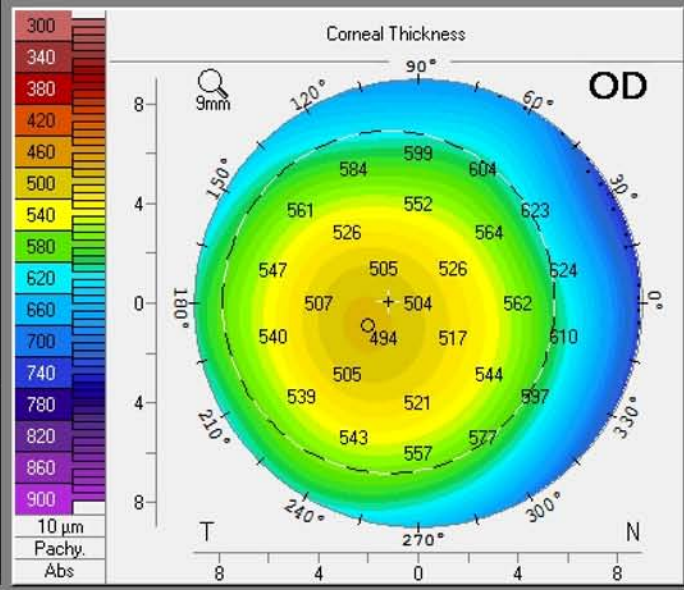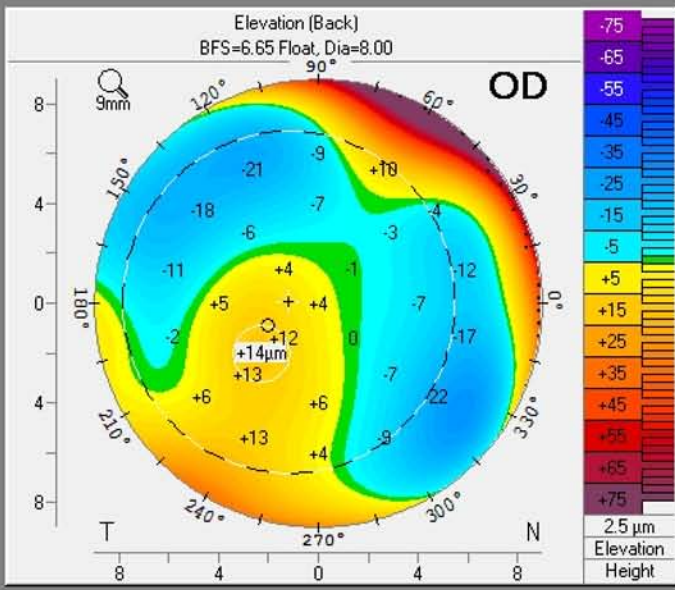

## F1: IV-17 (OS)

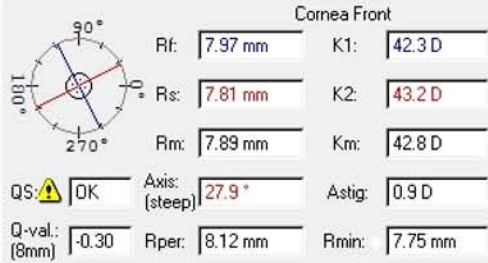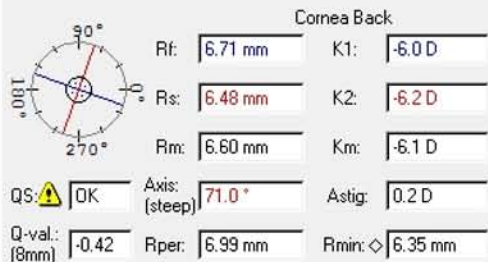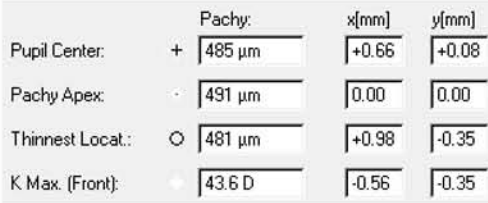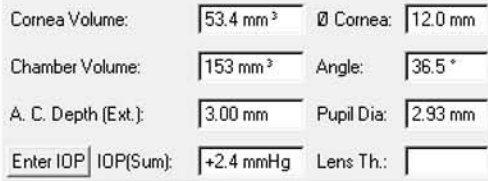

### Refractive

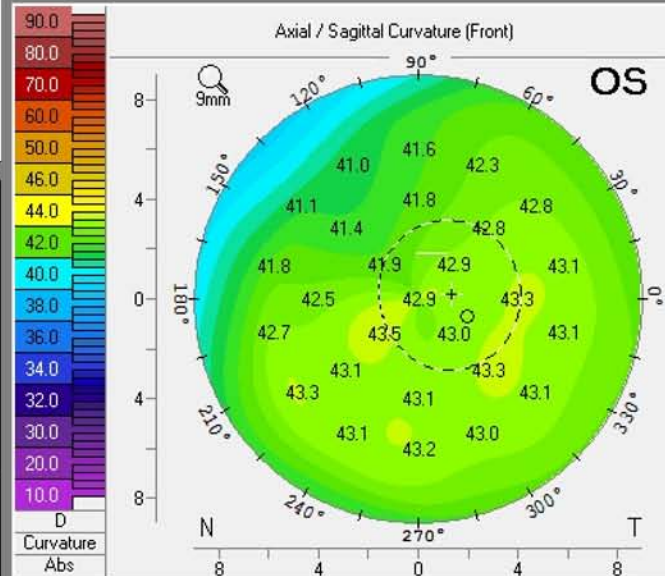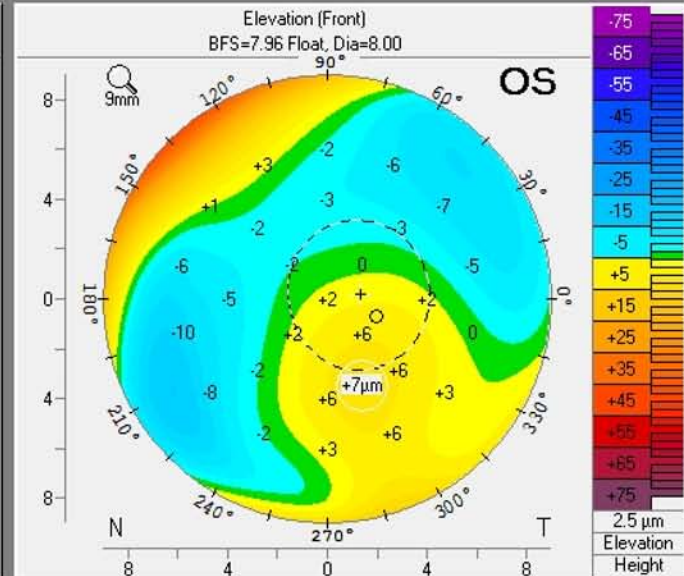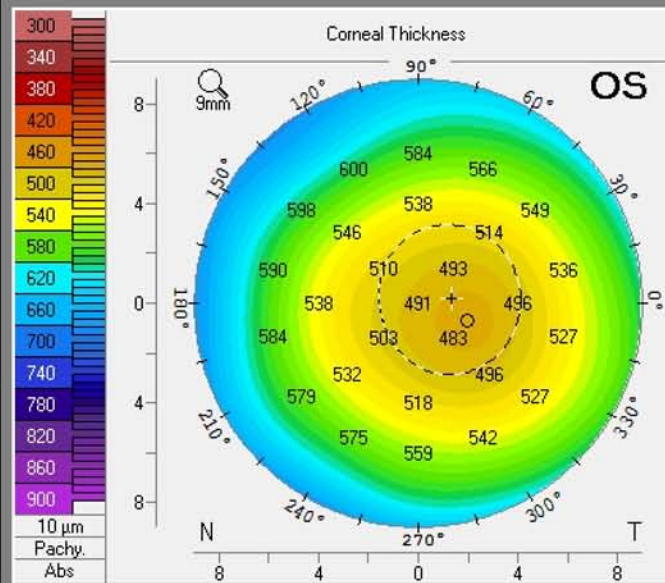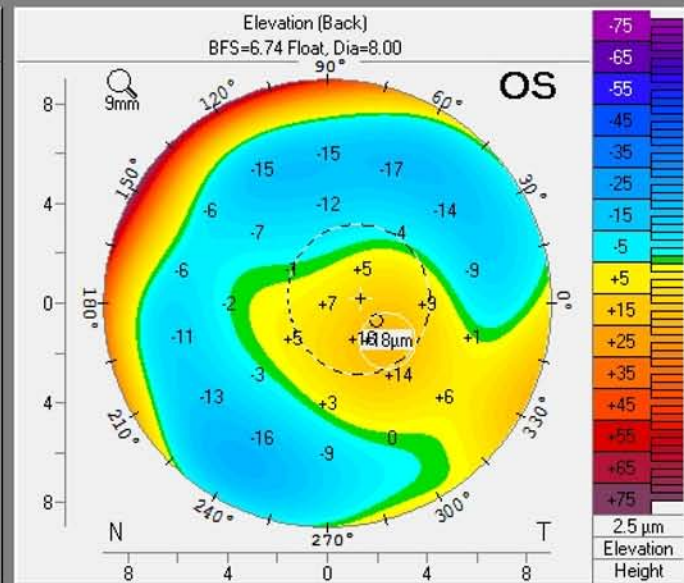



## F1: IV-18 (OD)

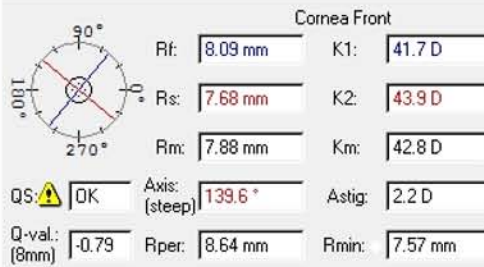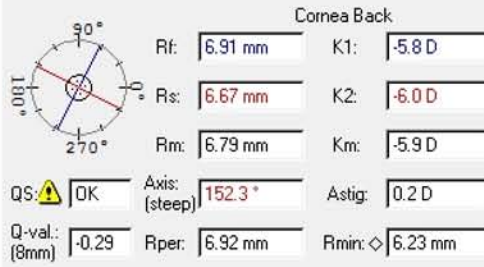

|                  |   |        |       |       |       |       |
|------------------|---|--------|-------|-------|-------|-------|
| Pupil Center:    | + | 541 μm | x[mm] | -0.44 | y[mm] | +0.18 |
| Pachy Apex:      | - | 550 μm |       | 0.00  |       | 0.00  |
| Thinnest Locat.: | ○ | 530 μm |       | -1.52 |       | +0.67 |
| K Max. (Front):  | + | 44.6 D |       | +0.79 |       | -1.03 |

|                     |                      |            |         |
|---------------------|----------------------|------------|---------|
| Cornea Volume:      | 58.5 mm <sup>3</sup> | ∅ Cornea:  |         |
| Chamber Volume:     | 209 mm <sup>3</sup>  | Angle:     | 39.5°   |
| A. C. Depth (Ext.): | 2.52 mm              | Pupil Dia: | 1.64 mm |
| Enter IOP           | IOP(Sum): ±0.0 mmHg  | Lens Th.:  |         |

### Refractive

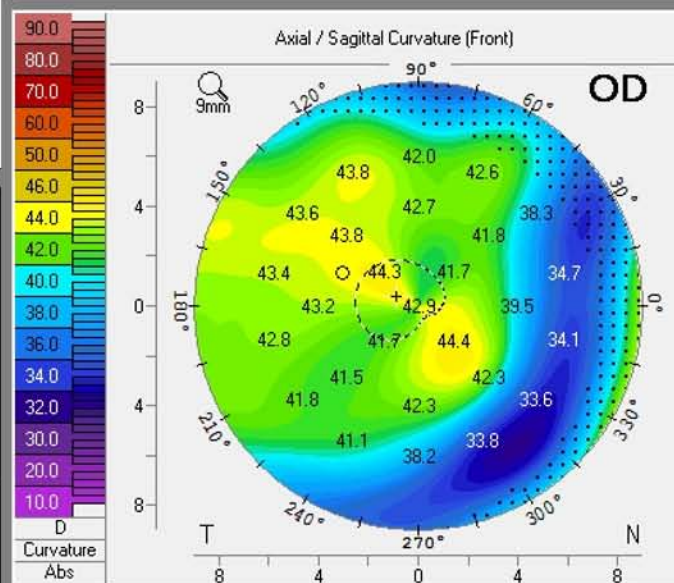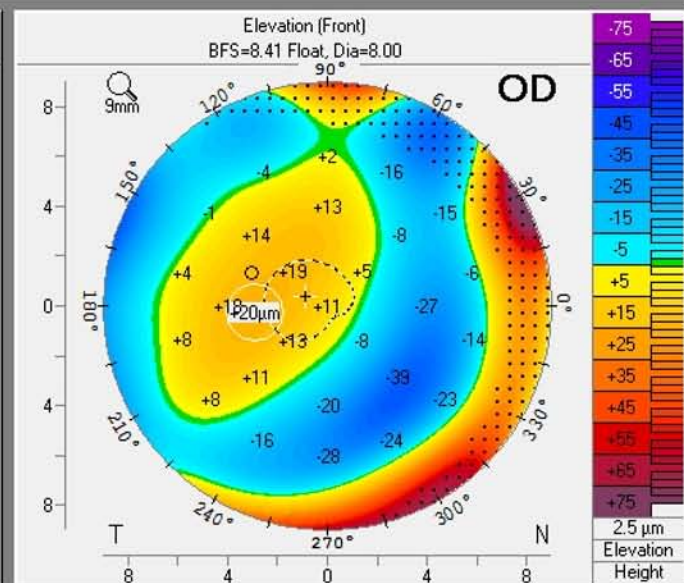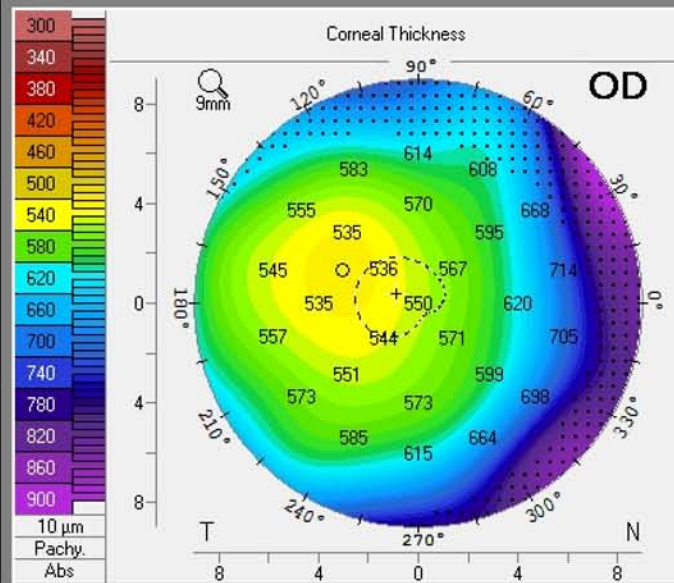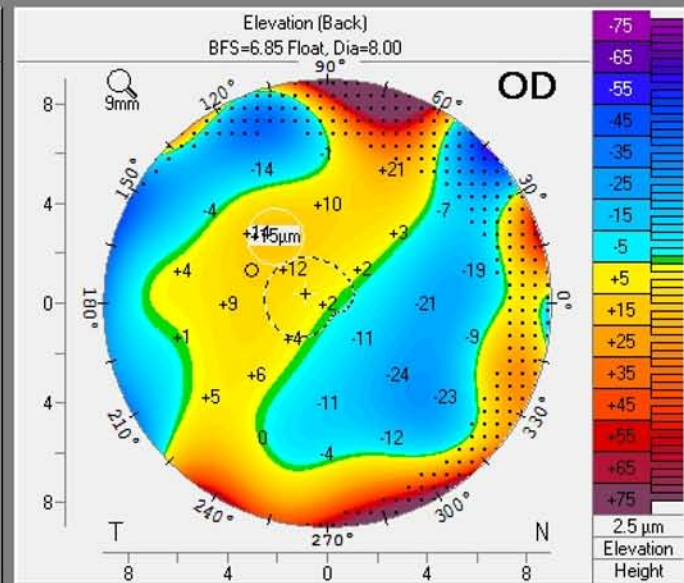

## F1: IV-18 (OS)

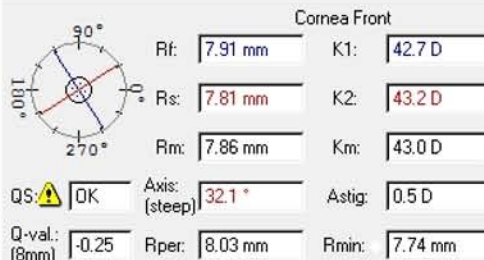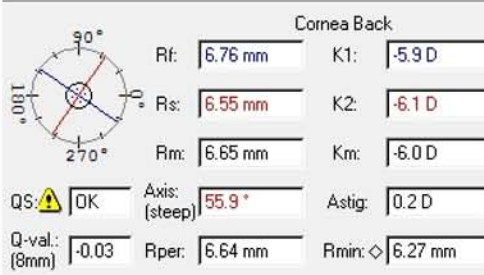

|                  |   |        |       |       |       |       |
|------------------|---|--------|-------|-------|-------|-------|
| Pupil Center:    | + | 503 μm | x[mm] | +0.19 | y[mm] | +0.10 |
| Pachy Apex:      | - | 503 μm |       | 0.00  |       | 0.00  |
| Thinnest Locat.: | ○ | 499 μm |       | +0.74 |       | -0.54 |
| K Max. (Front):  |   | 43.6 D |       | -0.81 |       | -1.41 |

|                     |                      |            |         |
|---------------------|----------------------|------------|---------|
| Cornea Volume:      | 56.5 mm <sup>3</sup> | ∅ Cornea:  | 12.0 mm |
| Chamber Volume:     | 254 mm <sup>3</sup>  | Angle:     | 56.9°   |
| A. C. Depth (Ext.): | 5.25 mm              | Pupil Dia: | 4.09 mm |
| Enter IOP           | IOP(Sum): +1.9 mmHg  | Lens Th.:  |         |

### Refractive

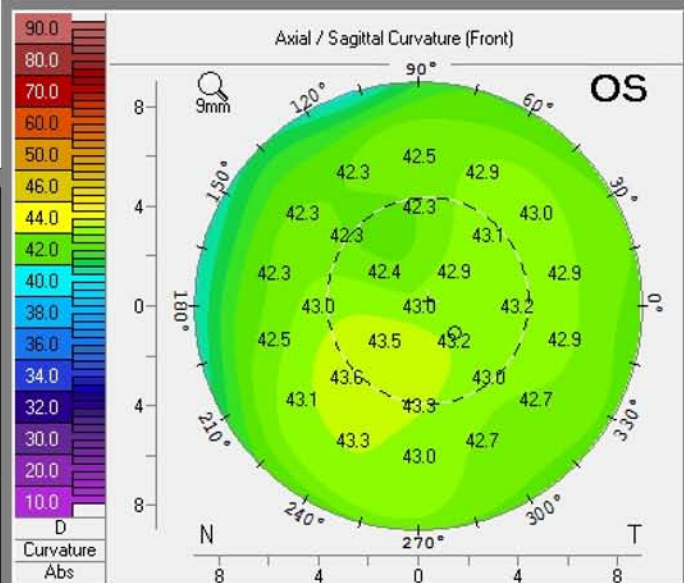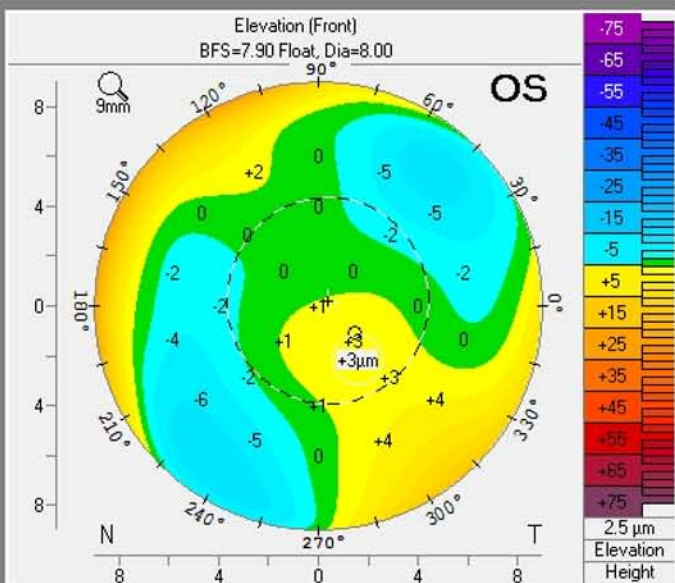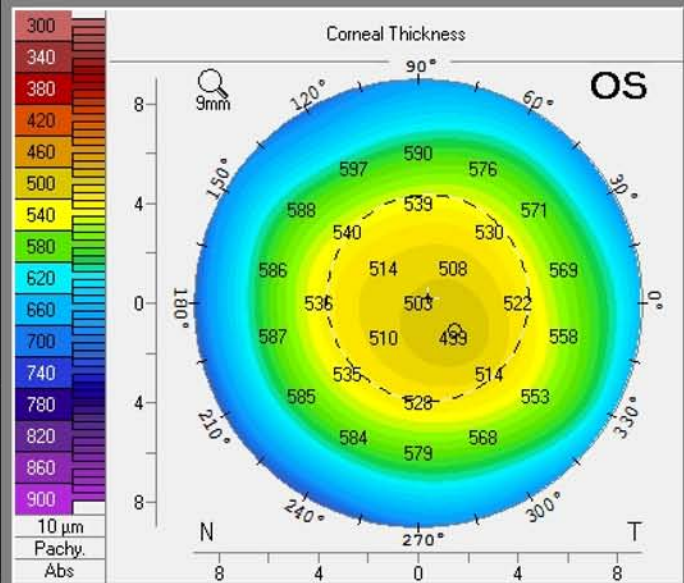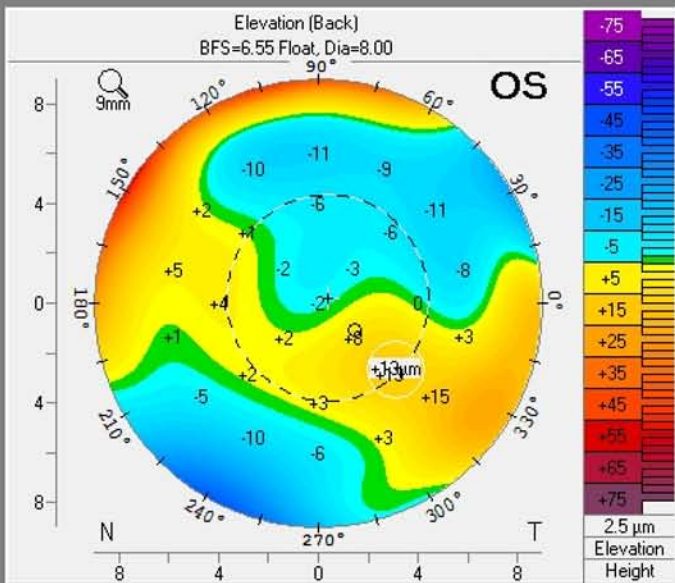

## F1: V-6 (OD)

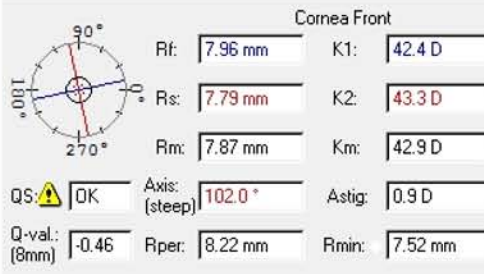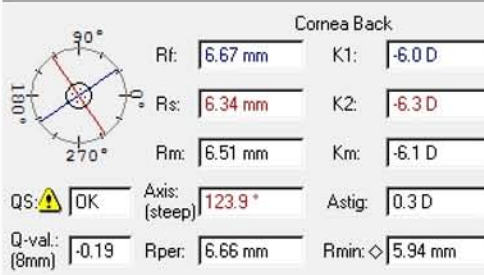

|                     |                      |            |         |       |       |
|---------------------|----------------------|------------|---------|-------|-------|
| Pupil Center:       | + 531 μm             | x[mm]      | -0.44   | y[mm] | +0.40 |
| Pachy Apex:         | 534 μm               |            | 0.00    |       | 0.00  |
| Thinnest Locat.:    | 531 μm               |            | -0.58   |       | +0.12 |
| K Max. (Front):     | 44.9 D               |            | -1.10   |       | +2.32 |
| Cornea Volume:      | 59.5 mm <sup>3</sup> | ∅ Cornea:  |         |       |       |
| Chamber Volume:     | 228 mm <sup>3</sup>  | Angle:     | 41.9°   |       |       |
| A. C. Depth (Ext.): | 3.98 mm              | Pupil Dia: | 6.49 mm |       |       |
| Enter IOP           | IOP(Sum): +0.6 mmHg  | Lens Th.:  | 3.19 mm |       |       |

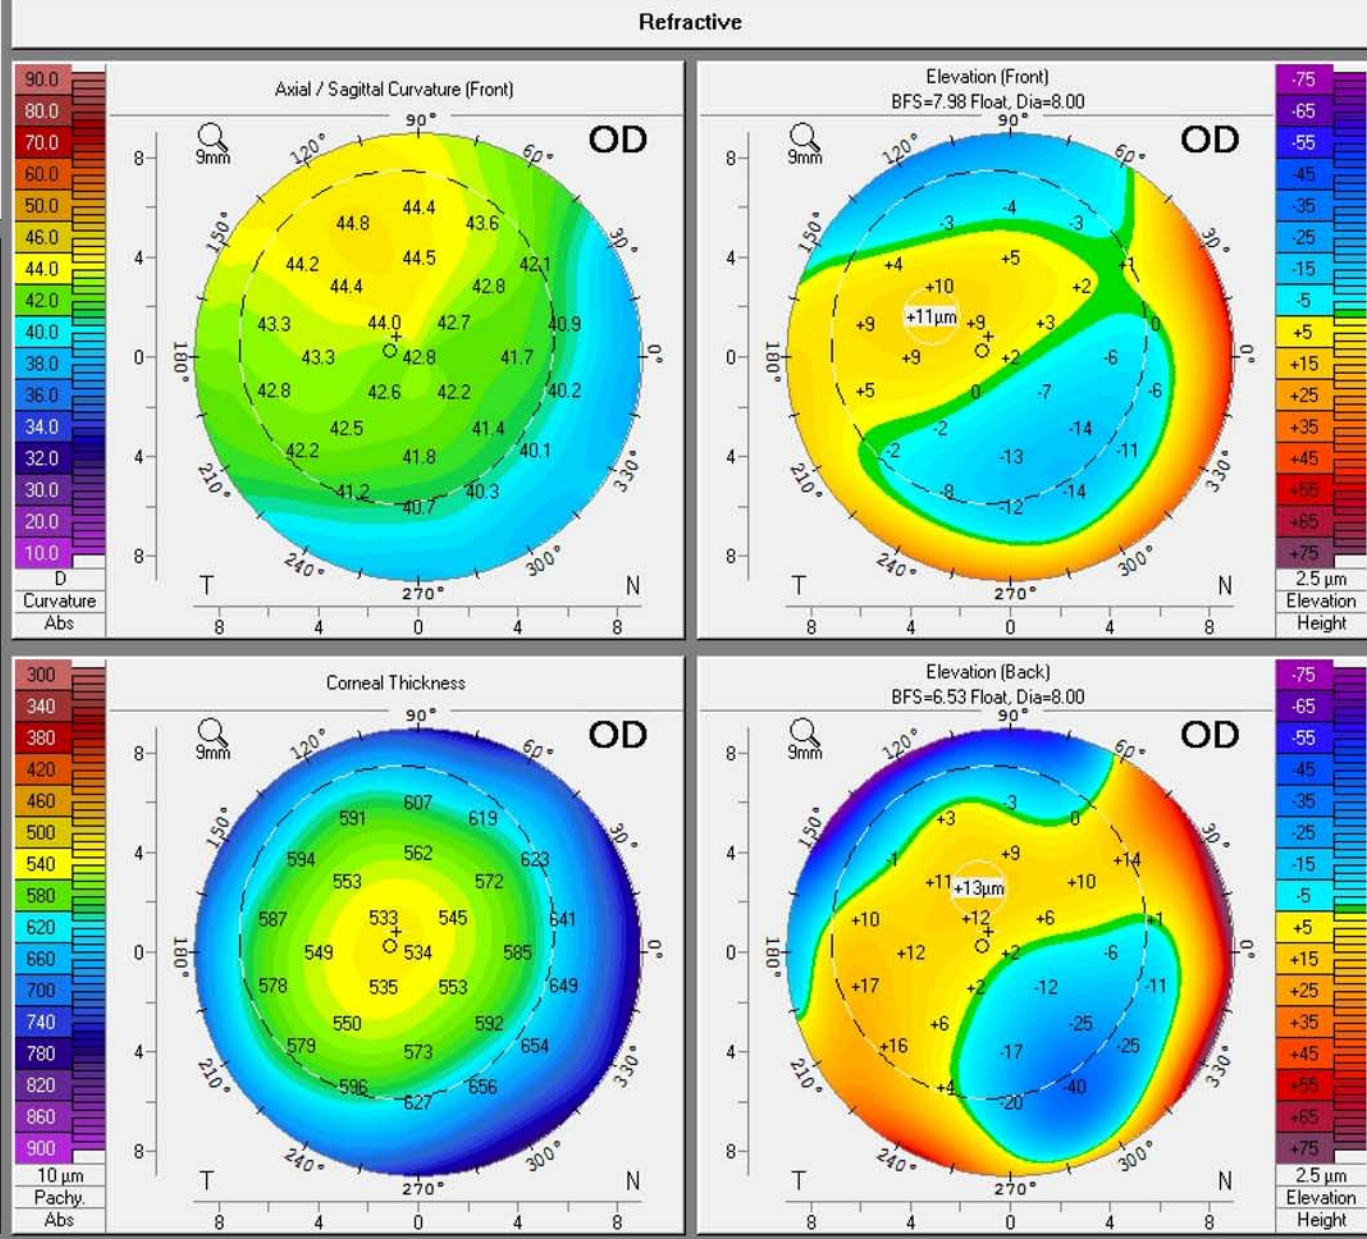

## F1: V-6 (OS)

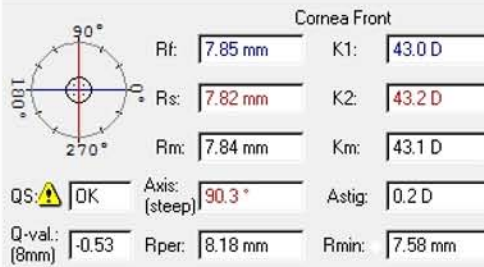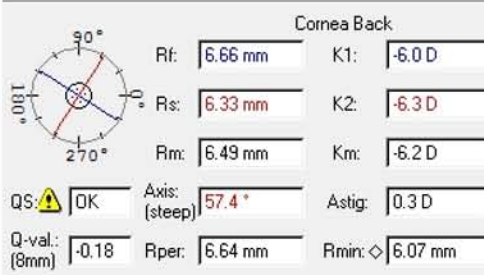

|                  |          |       |       |       |       |
|------------------|----------|-------|-------|-------|-------|
| Pupil Center:    | + 520 μm | x[mm] | +0.01 | y[mm] | +0.31 |
| Pachy Apex:      | 519 μm   |       | 0.00  |       | 0.00  |
| Thinnest Locat.: | 517 μm   |       | +0.59 |       | -0.26 |
| K Max. (Front):  | 44.5 D   |       | +0.99 |       | +2.63 |

|                     |                      |            |         |
|---------------------|----------------------|------------|---------|
| Cornea Volume:      | 58.8 mm <sup>3</sup> | ∅ Cornea:  |         |
| Chamber Volume:     | 210 mm <sup>3</sup>  | Angle:     | 30.7°   |
| A. C. Depth (Ext.): | 3.88 mm              | Pupil Dia: | 5.87 mm |
| Enter IOP           | IOP(Sum): +1.2 mmHg  | Lens Th.:  | 3.26 mm |

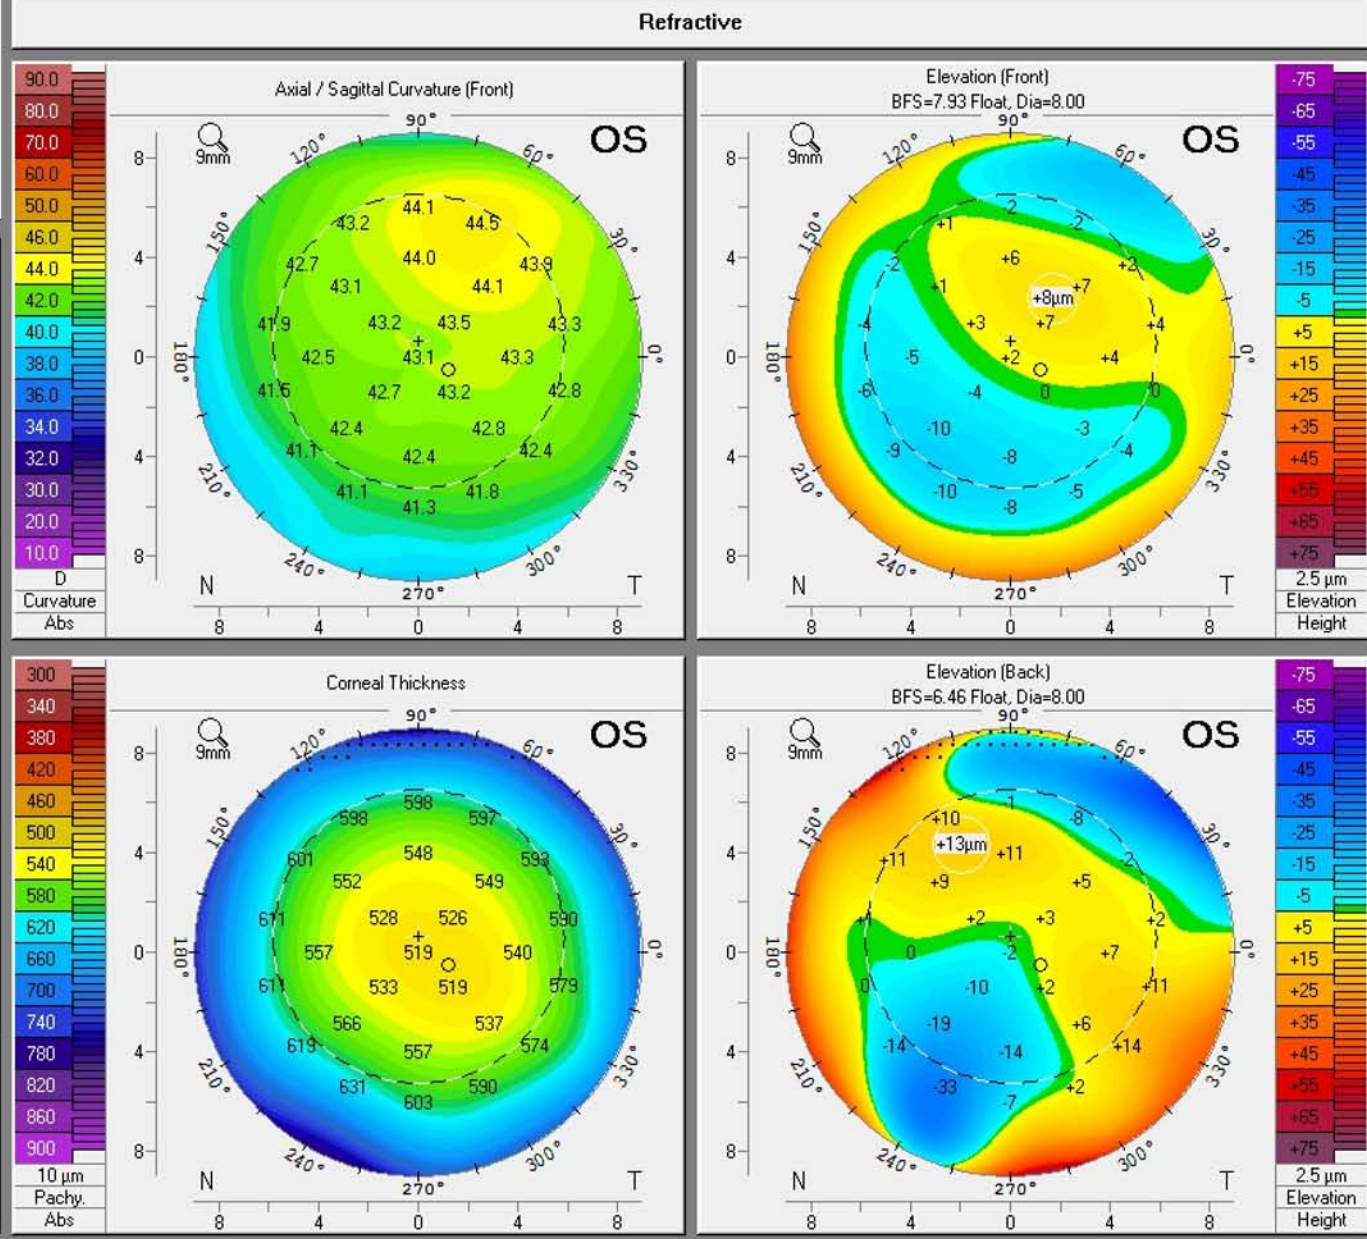

## F1: V-7 (OD)

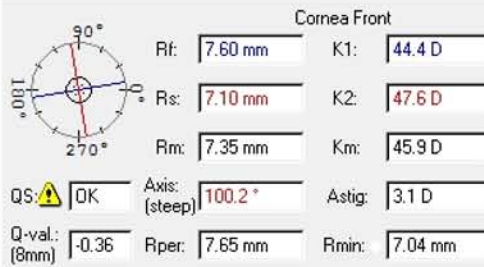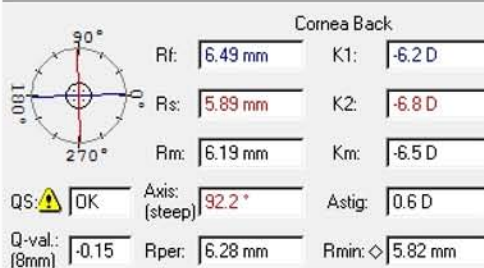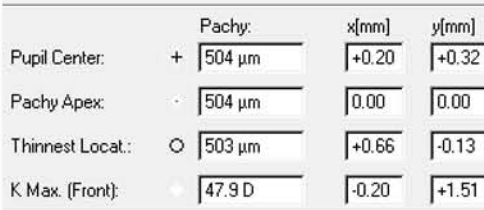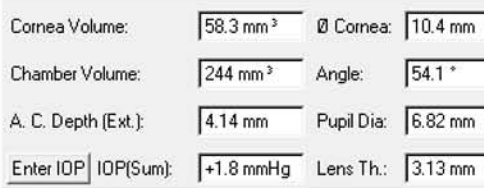

### Refractive

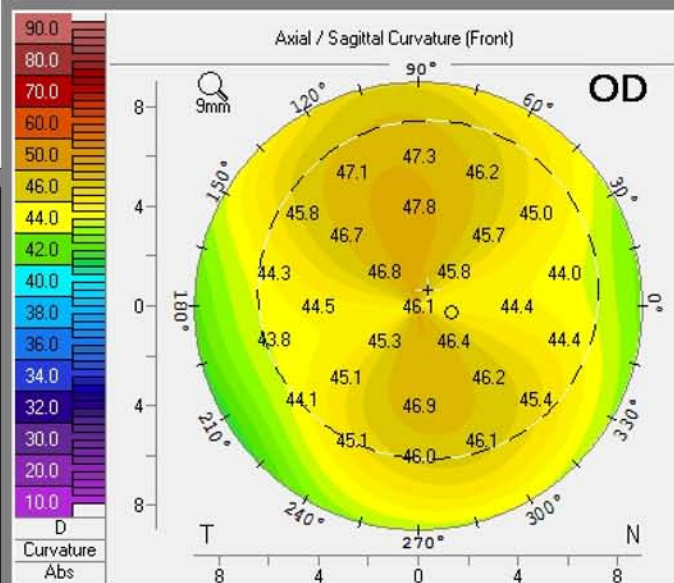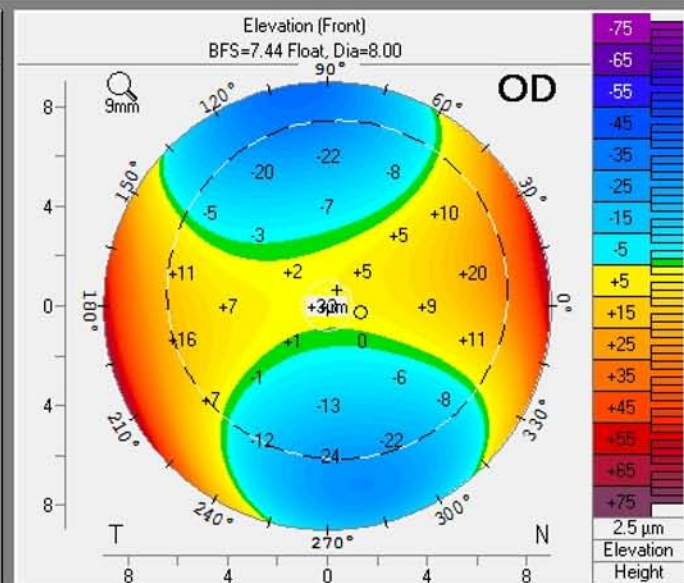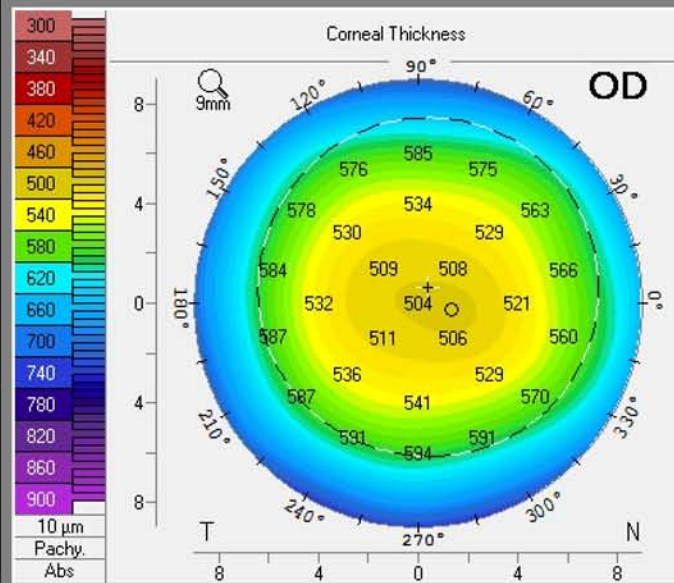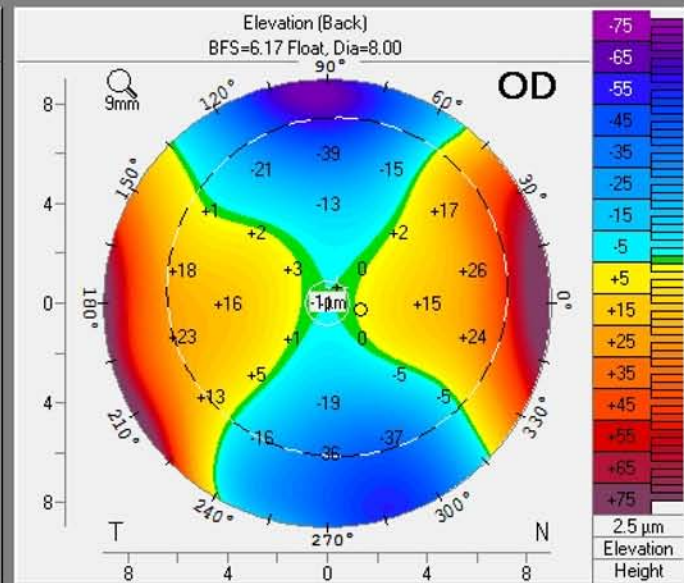

## F1: V-7 (OS)

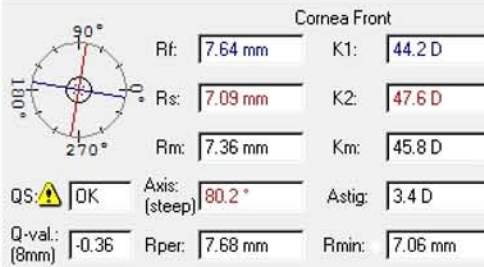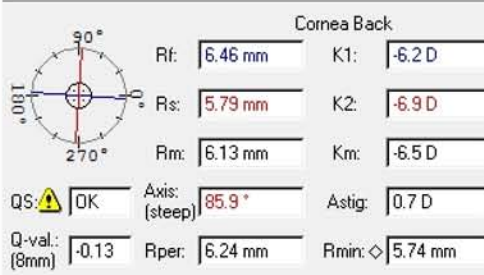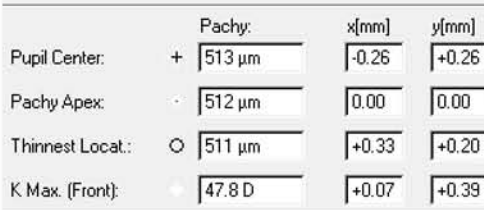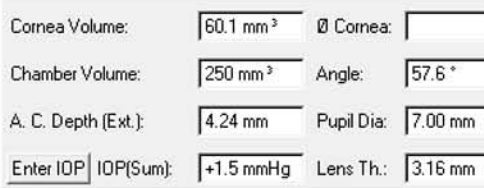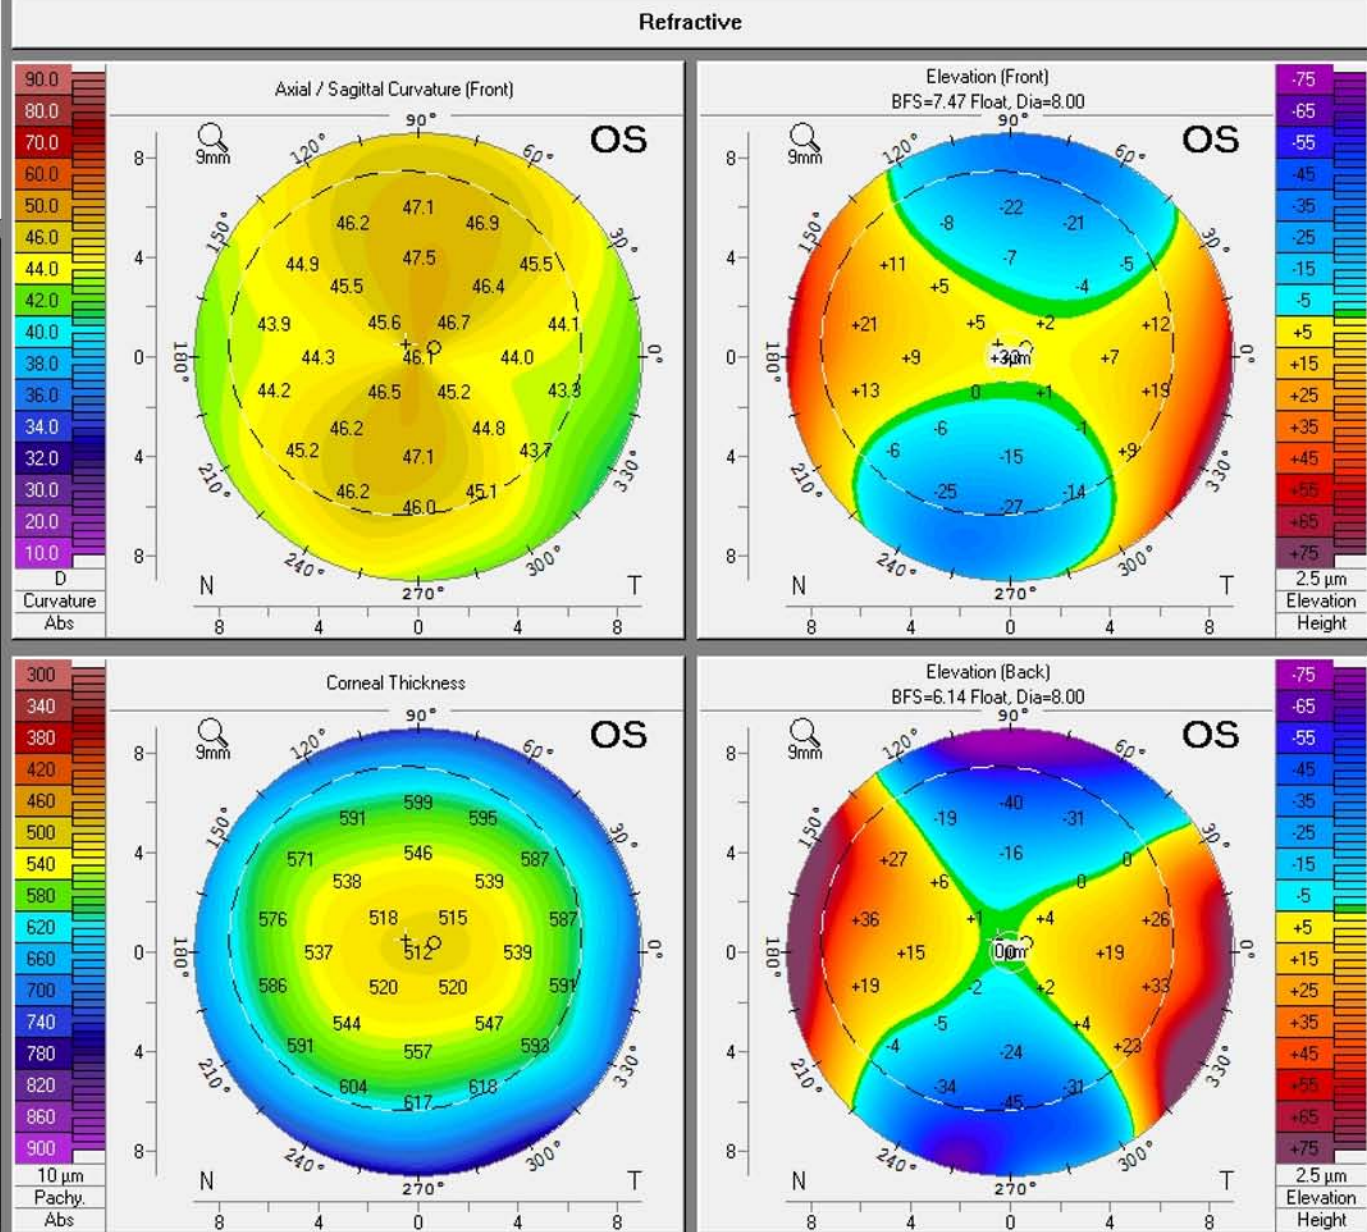

## F2: II-3 (OD)

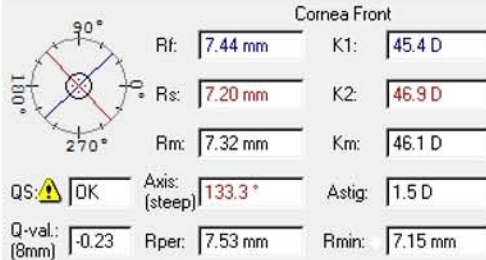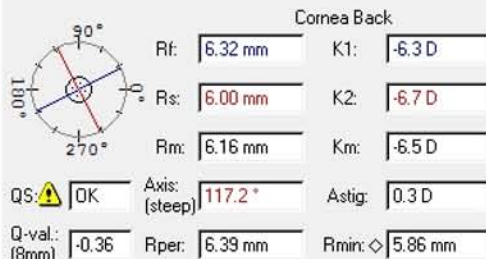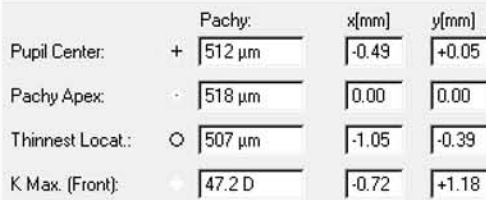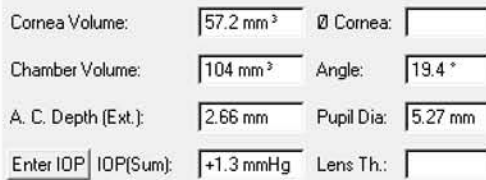

### Refractive

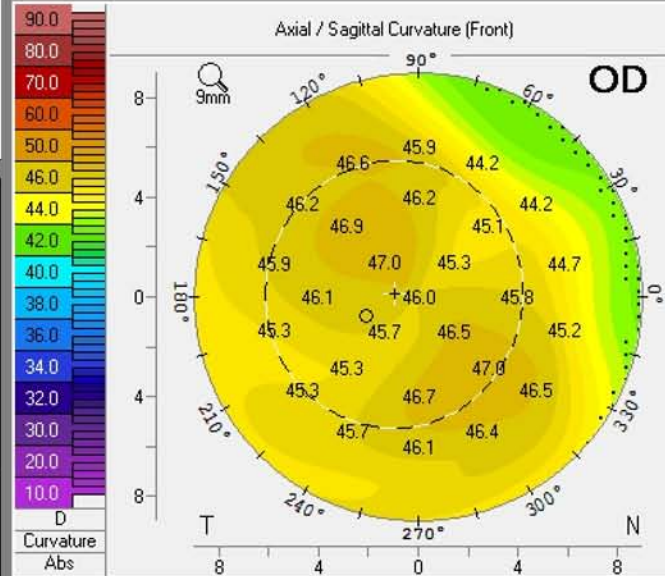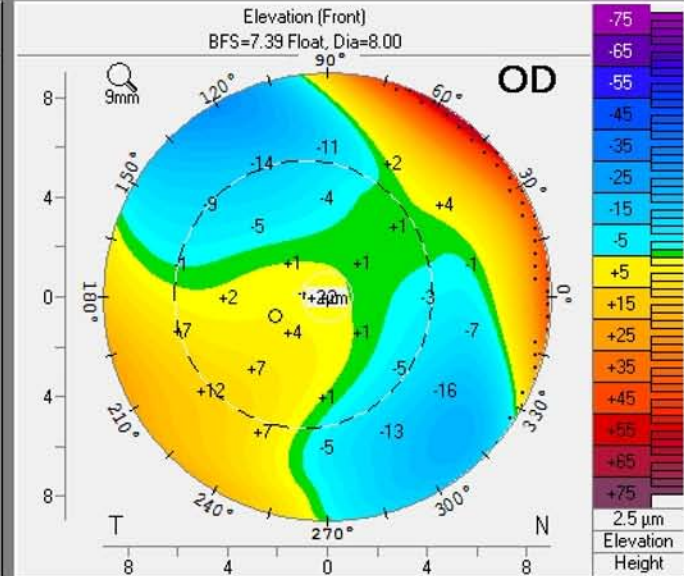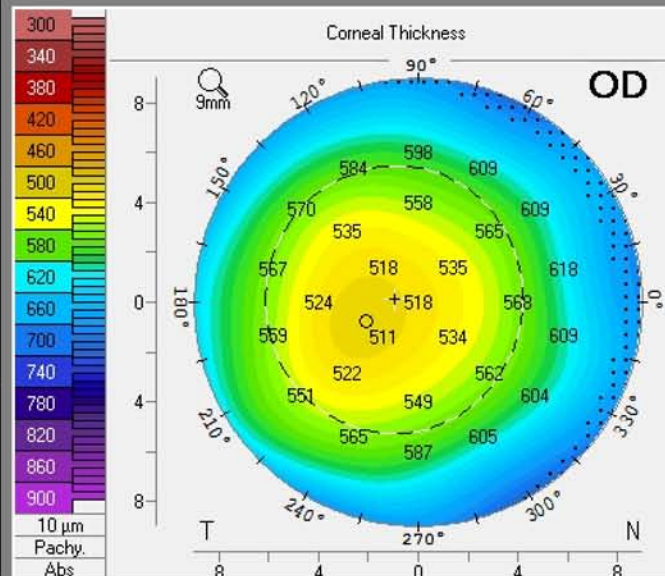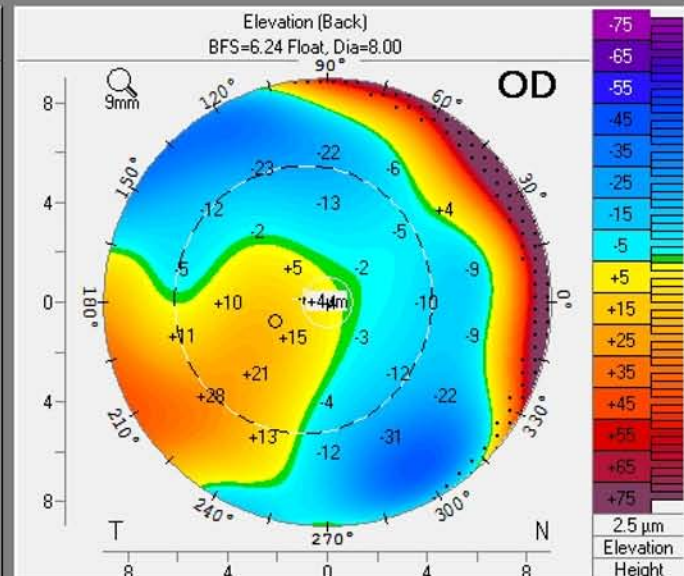

## F2: II-3 (OS)

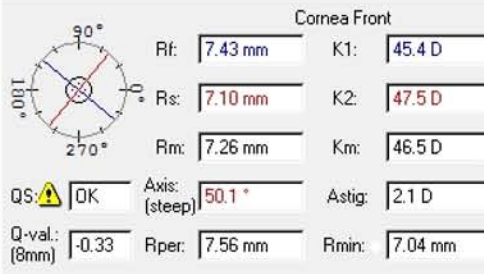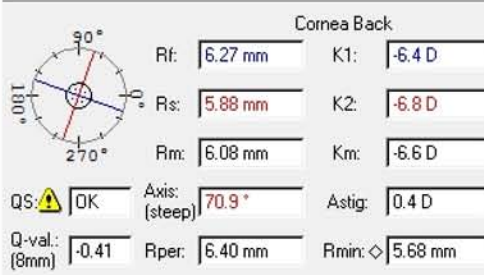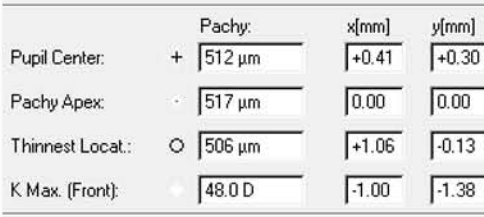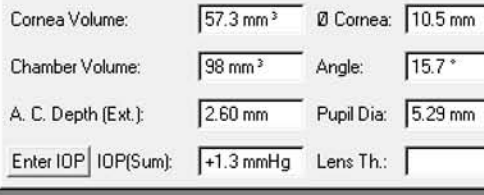

### Refractive

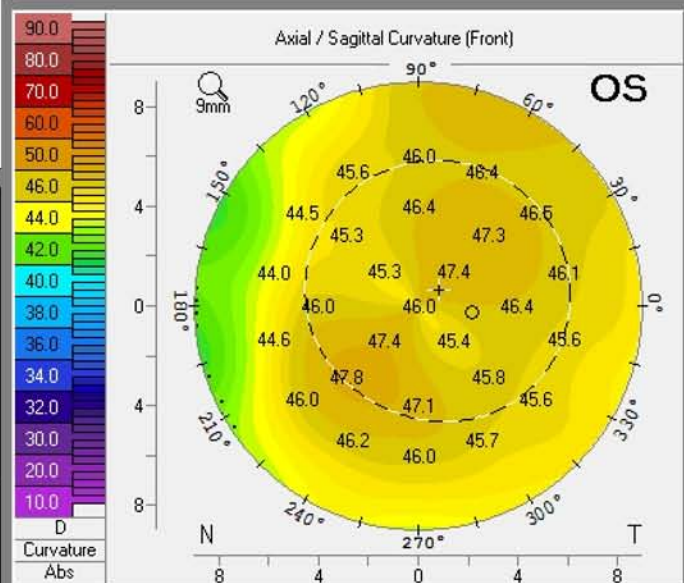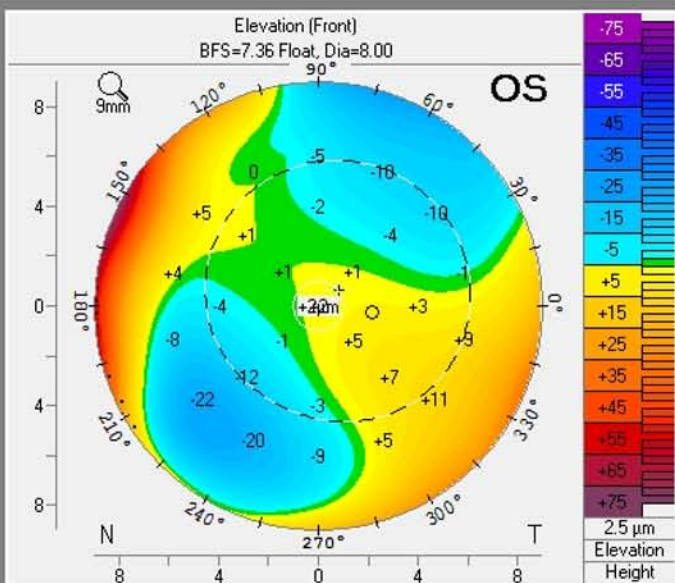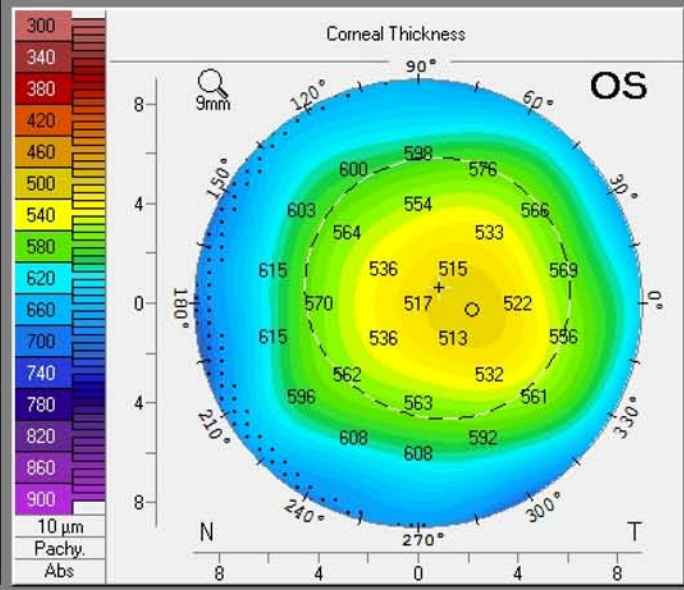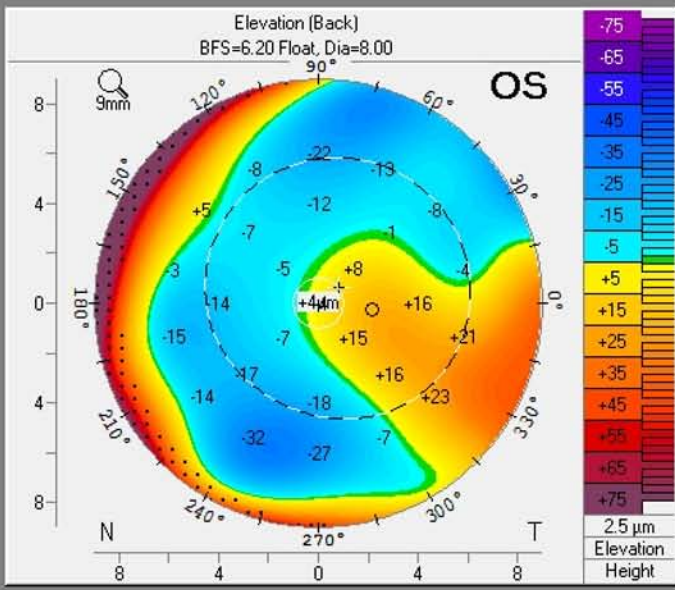



## F4: IV-6 (OD)

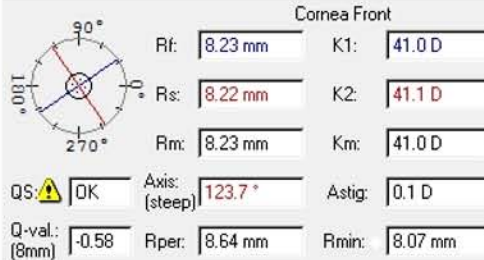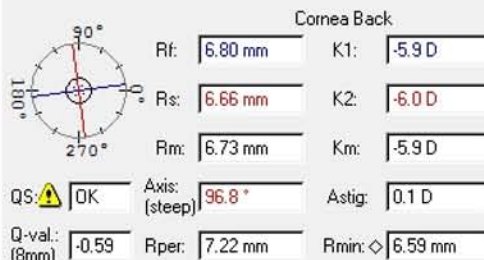

|                     |           |            |                      |       |         |       |       |
|---------------------|-----------|------------|----------------------|-------|---------|-------|-------|
| Pupil Center:       | +         | Pachy:     | 625 μm               | x(mm) | -0.27   | y(mm) | -0.40 |
| Pachy Apex:         | -         |            | 630 μm               |       | 0.00    |       | 0.00  |
| Thinnest Locat.:    | ○         |            | 622 μm               |       | -0.75   |       | -0.88 |
| K Max. (Front):     |           |            | 41.8 D               |       | -0.68   |       | -2.17 |
| Cornea Volume:      |           | ∅ Cornea:  | 64.4 mm <sup>3</sup> |       | 11.2 mm |       |       |
| Chamber Volume:     |           | Angle:     | 159 mm <sup>3</sup>  |       | 15.9°   |       |       |
| A. C. Depth (Ext.): |           | Pupil Dia: | 3.31 mm              |       | 6.87 mm |       |       |
| Enter IOP           | IOP(Sum): | Lens Th.:  | -3.2 mmHg            |       | 3.61 mm |       |       |

### Refractive

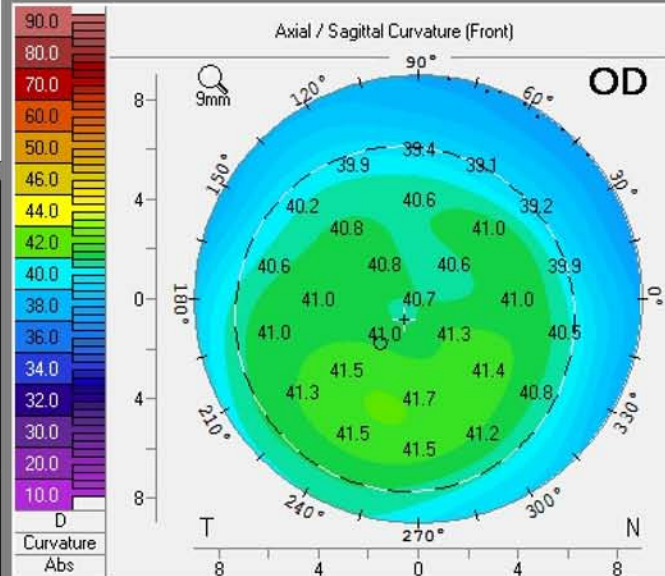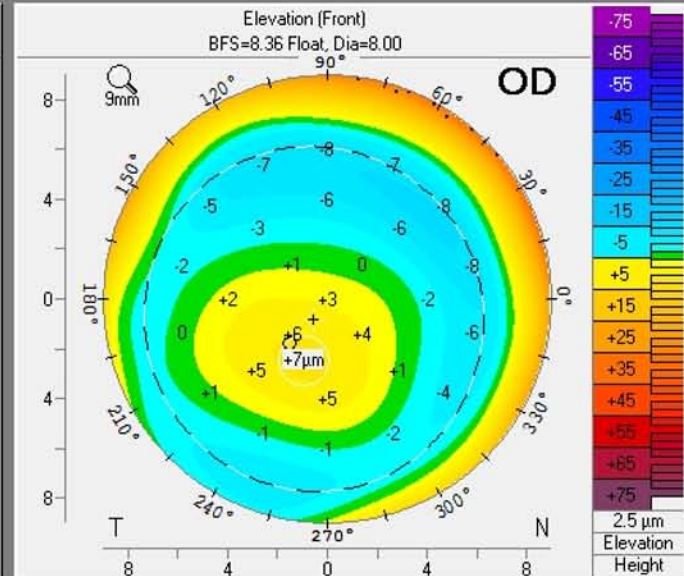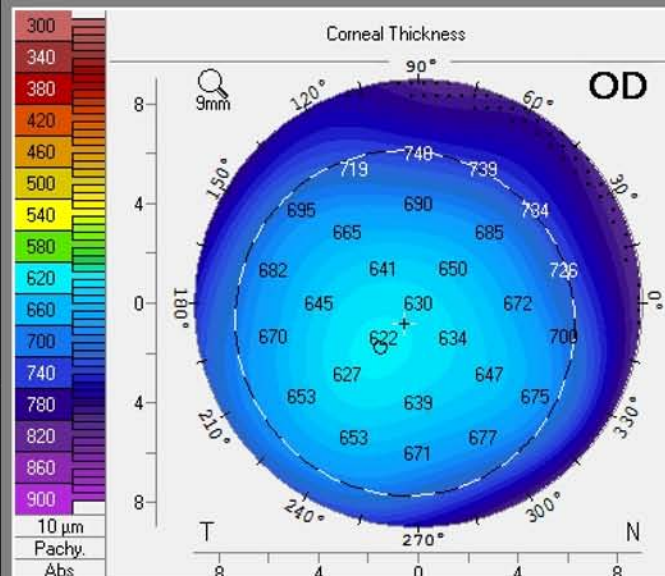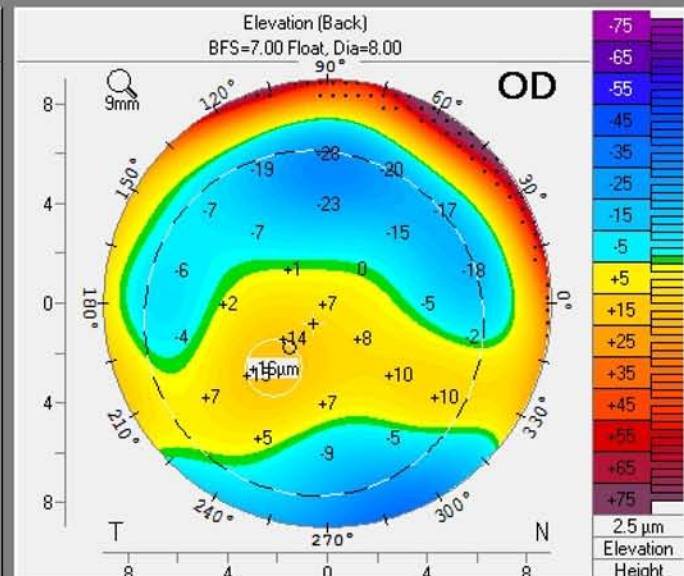

## F4: IV-6 (OS)

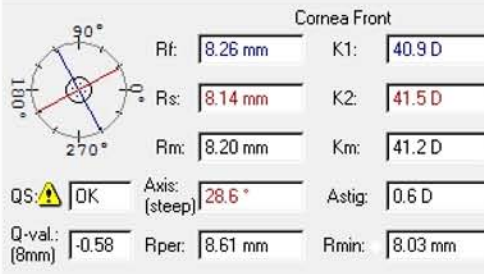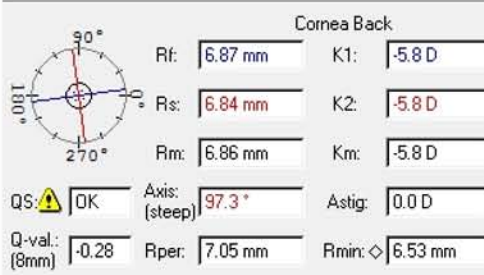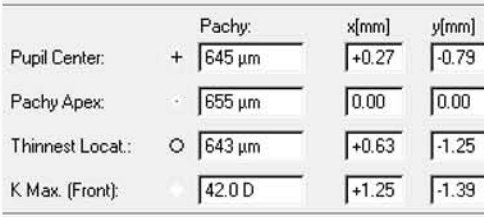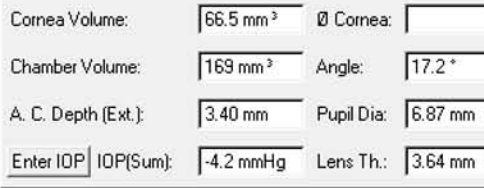

### Refractive

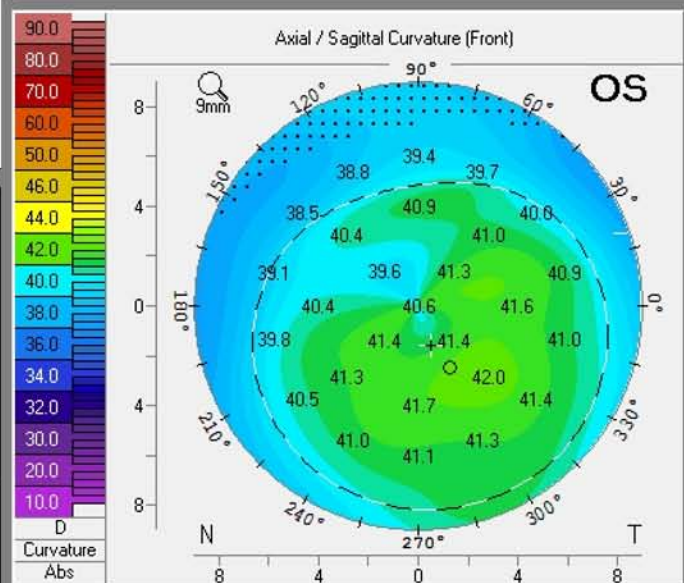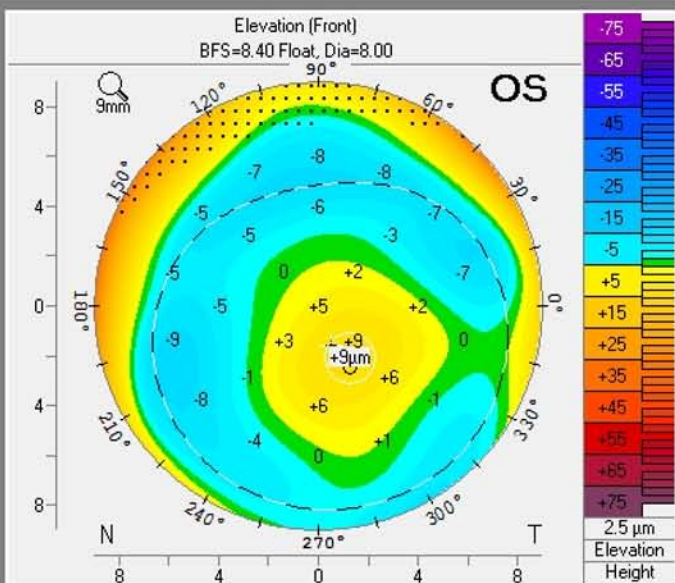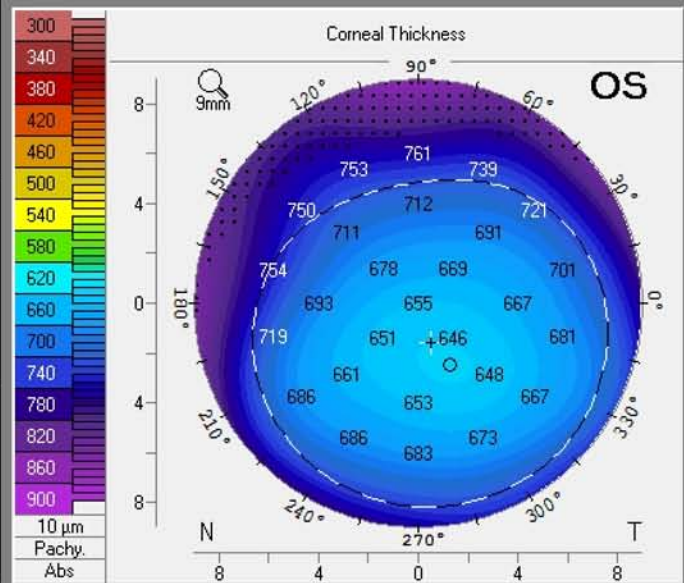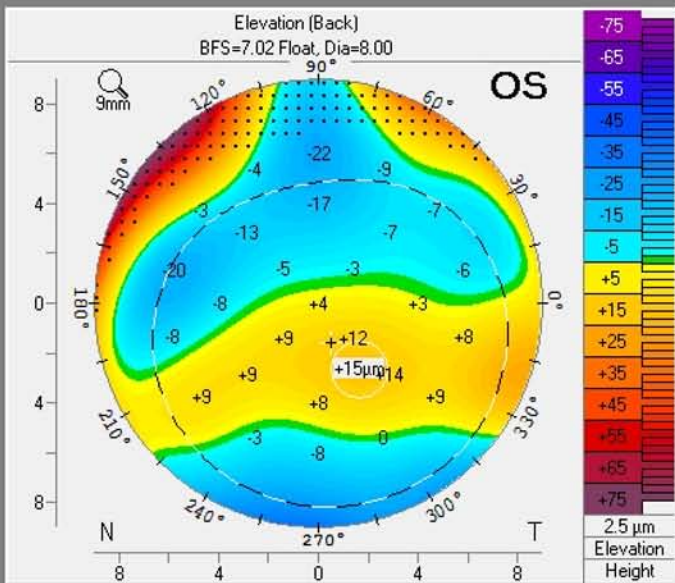

Supplement: MGG3-8-e1123-s006.pdf [file MGG3-8-e1123-s006.pdf]
