# Supplementary material for: Extending the spectrum of CLRN1‐ and ABCA4‐associated inherited retinal dystrophies caused by novel and recurrent variants using exome sequencing
Source: PubMed Central journal article supplement — Mol Genet Genomic Med. 2020 Jan 22;8(3):e1123. doi: 10.1002/mgg3.1123 (PMC7057102; doi:10.1002/mgg3.1123), 2020-01-22
Supplement: MGG3-8-e1123-s005.pdf [file MGG3-8-e1123-s005.pdf]

# F1: IV-8

## Diagnosis: 1\_Dark Adapted 0.01 ERG (GF)

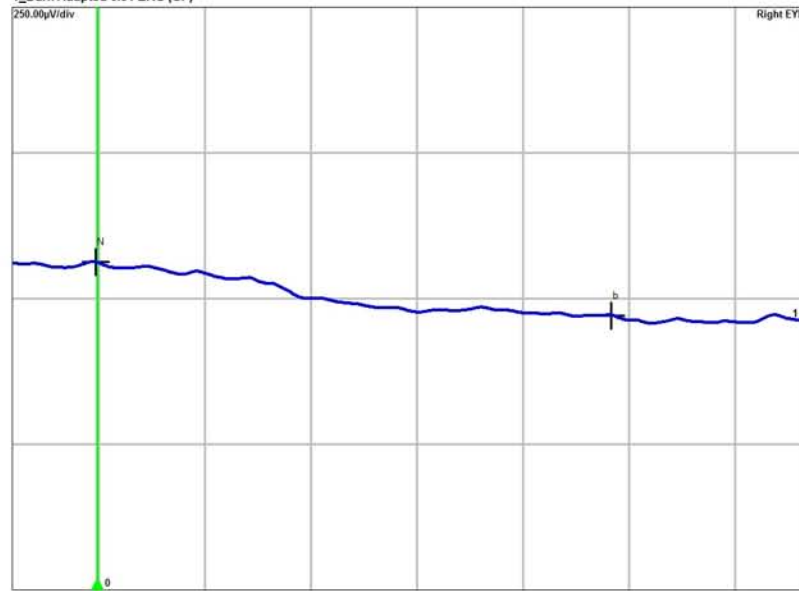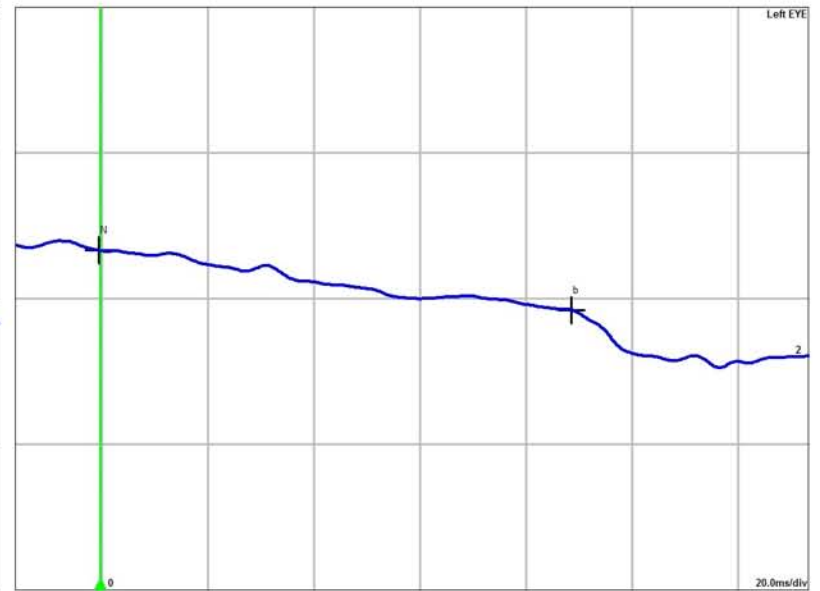

Normals  
Channel  
1 R-1  
2 L-2

67-91  
b [ms]  
97.2 (I)  
88.9

95.0µV-305µV  
b-wave  
92.4µV (I)  
103µV

## 2\_Dark Adapted 3.0 ERG (GF)

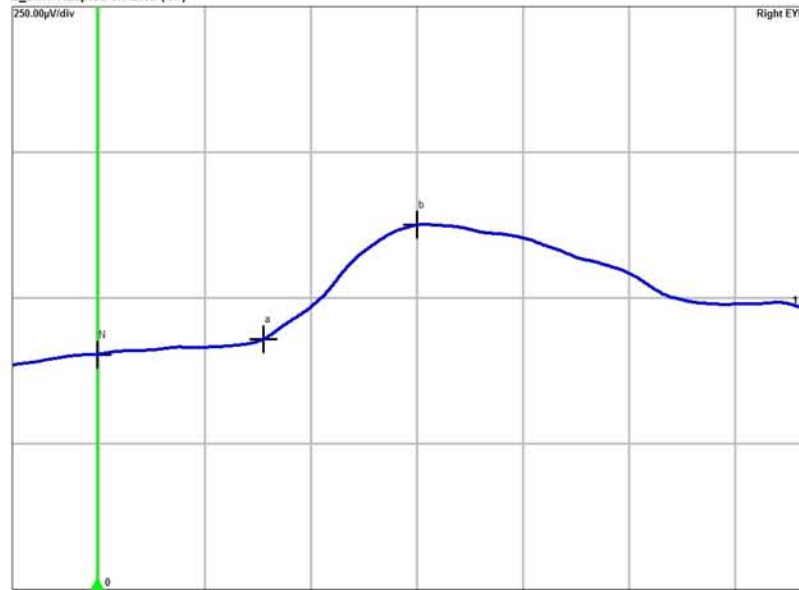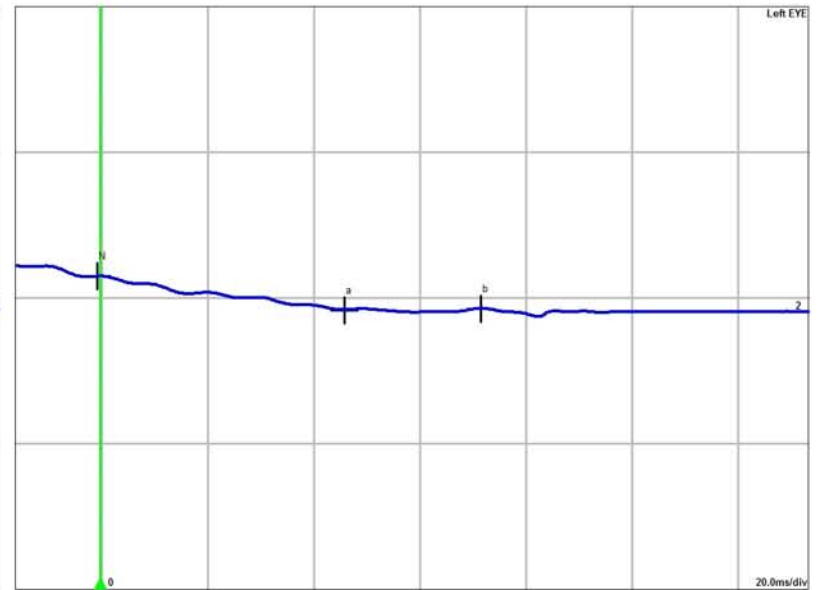

Normals  
Channel  
1 R-1  
2 L-2

14-22  
a [ms]  
31.4 (I)  
46.1 (I)

33-46  
b [ms]  
60.5 (I)  
71.9 (I)

155µV-356µV  
a-wave  
25.2µV (I)  
58.7µV (I)

290µV-654µV  
b-wave  
197µV (I)  
2.46µV (I)

1.50-2.60  
b/a  
7.52  
0.0419 (I)

# F1: IV-8

3\_Dark Adapted 10.0 ERG (GF)

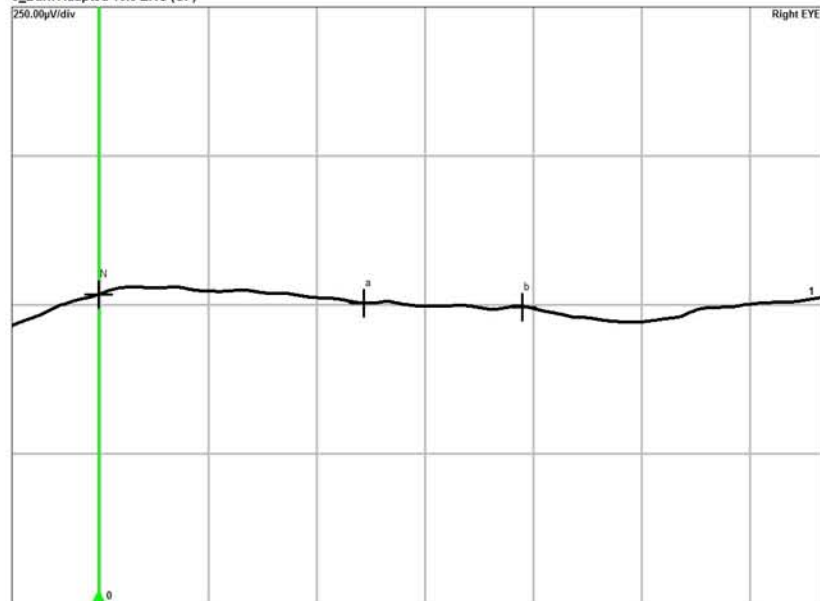

|         |        |        |        |
|---------|--------|--------|--------|
| Channel | a [ms] | b [ms] | a-wave |
| 1 R-1   | 49.0   | 78.4   | 14.9µV |
| 2 L-2   | 35.2   | 73.7   | 34.2µV |

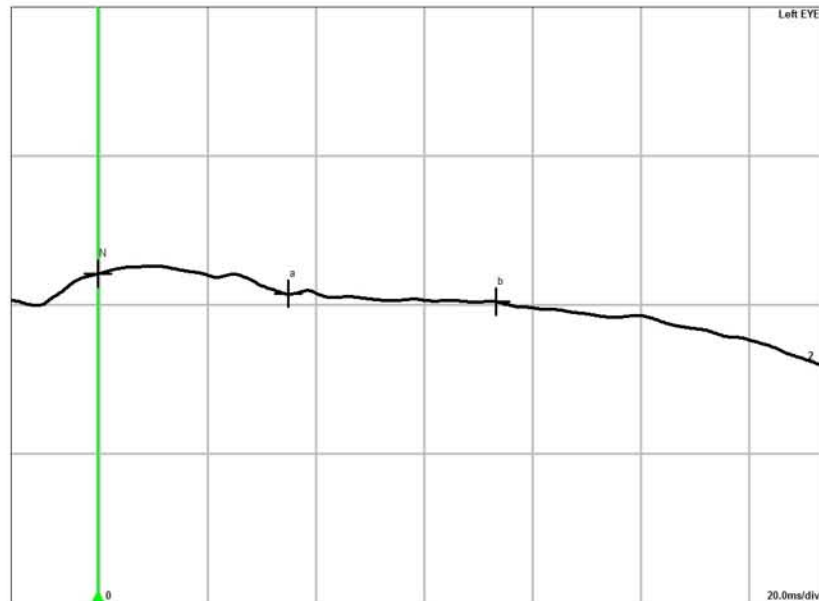

|        |        |
|--------|--------|
| b-wave | 6.74µV |
| 12.7µV |        |

4\_Dark Adapted 3.0 Oscillatory Potential ERG (GF)

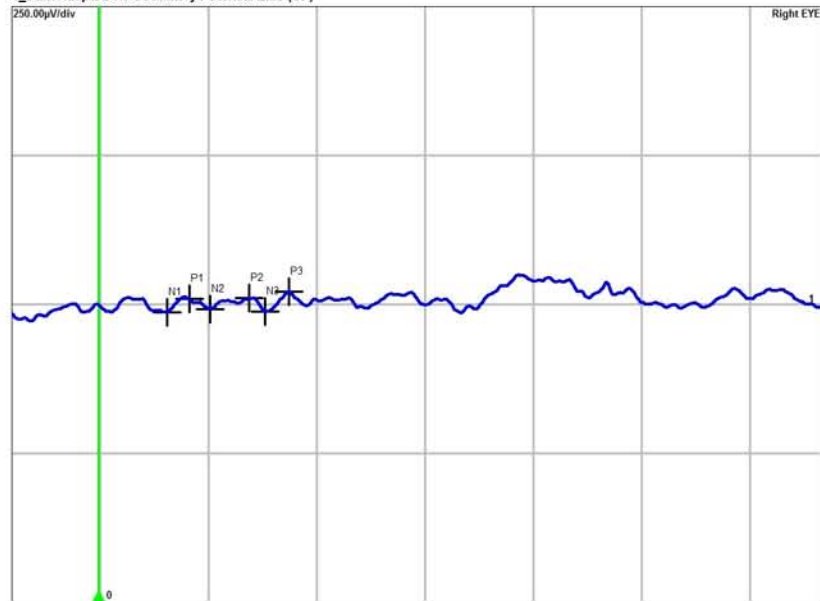

|         |         |         |          |         |         |
|---------|---------|---------|----------|---------|---------|
| Channel | P1 [ms] | N2 [ms] | P2 [ms]  | N3 [ms] | P3 [ms] |
| 1 R-1   | 16.7    | 20.5    | 27.9 (0) | 30.8    | 35.2    |
| 2 L-2   | 19.1    | 22.6    | 28.1 (0) | 29.1    | 32.3    |
| Normals | -       | -       | 22-24    | -       | -       |

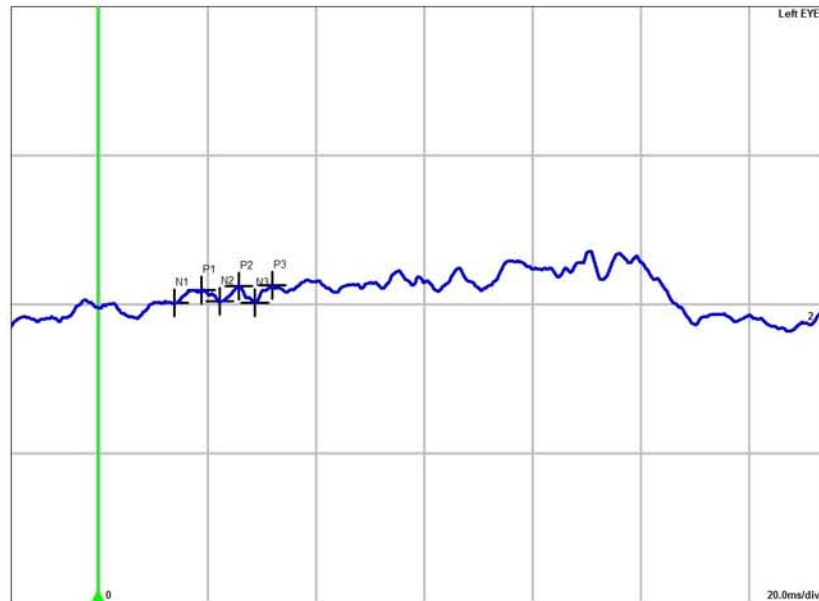

|               |        |        |        |
|---------------|--------|--------|--------|
| OS1           | OS2    | OS3    | Sum OS |
| 22.7µV        | 18.2µV | 34.2µV | 75.1µV |
| 22.2µV        | 26.0µV | 28.8µV | 75.9µV |
| 21.0µV-64.0µV |        |        |        |

# F1: IV-8

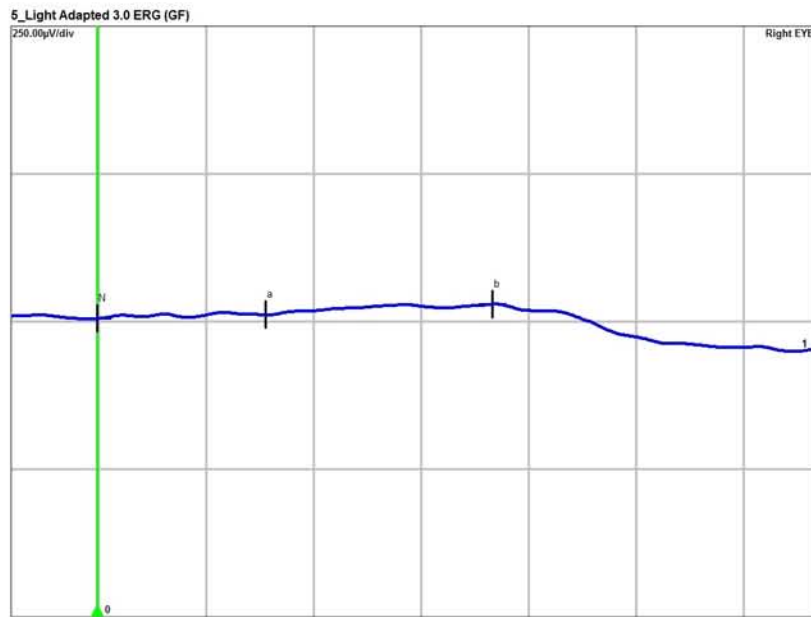

| Normals | 13-16    | 29-33    | 26.0µV-62.0µV |
|---------|----------|----------|---------------|
| Channel | a [ms]   | b [ms]   | a-wave        |
| 1 R-1   | 31.4 (I) | 73.7 (I) | 6.12µV (I)    |
| 2 L-2   | 37.6 (I) | 79.8 (I) | 19.0µV (I)    |

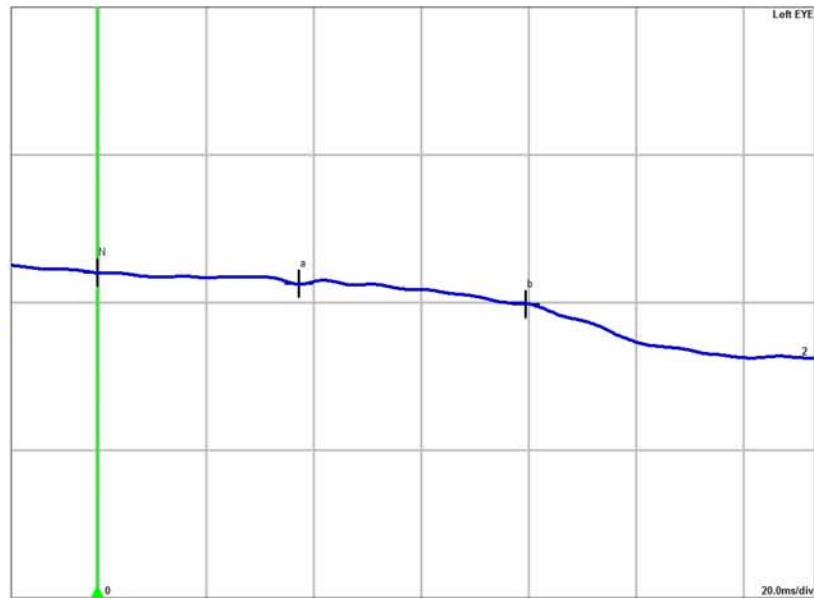

| Normals | 103µV-250µV |
|---------|-------------|
| Channel | b-wave      |
| 1 R-1   | 18.0µV (I)  |
| 2 L-2   | 33.8µV (I)  |

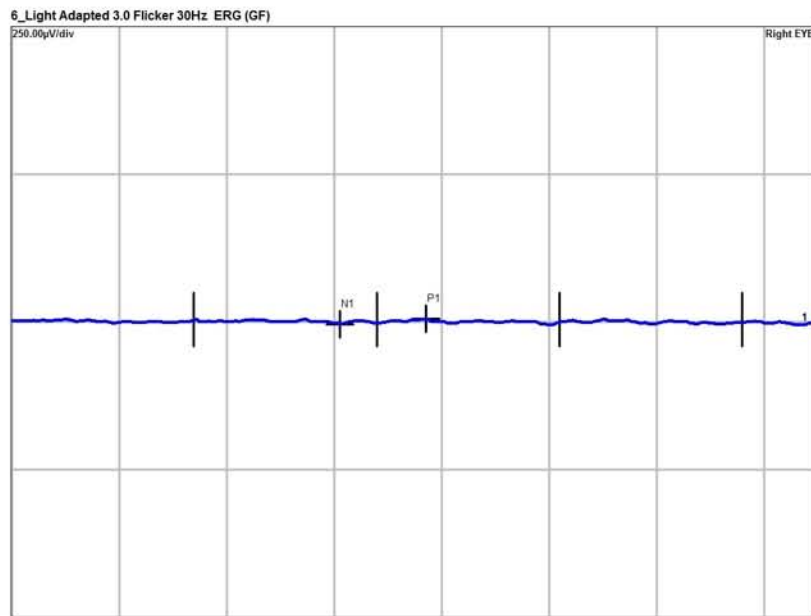

| Channel | P1 [ms]  | N1 - P1      | 30 Hz Amp |
|---------|----------|--------------|-----------|
| 1 R-1   | 77.5 (I) | 10.1µV (I)   | 1.87µV    |
| 2 L-2   | 59.6     | 8.73µV (I)   | 2.43µV    |
| Normals |          |              |           |
| 1 R-1   | 59-64    | 57.0µV-223µV |           |

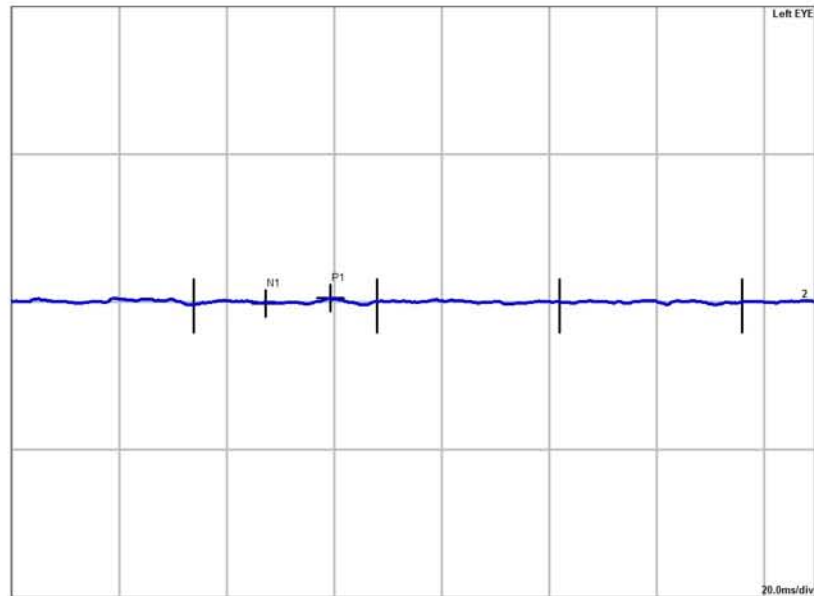

| Channel | P1 [ms]  | N1 - P1      | 30 Hz Amp |
|---------|----------|--------------|-----------|
| 1 R-1   | 77.5 (I) | 10.1µV (I)   | 1.87µV    |
| 2 L-2   | 59.6     | 8.73µV (I)   | 2.43µV    |
| Normals |          |              |           |
| 1 R-1   | 59-64    | 57.0µV-223µV |           |

F1: IV-17

**Diagnosis:**  
1\_Dark Adapted 0.01 ERG (GF)

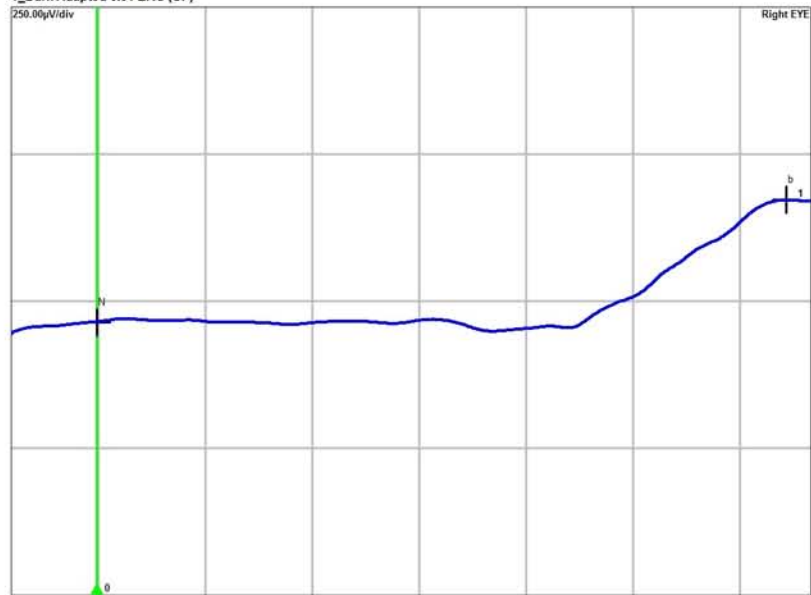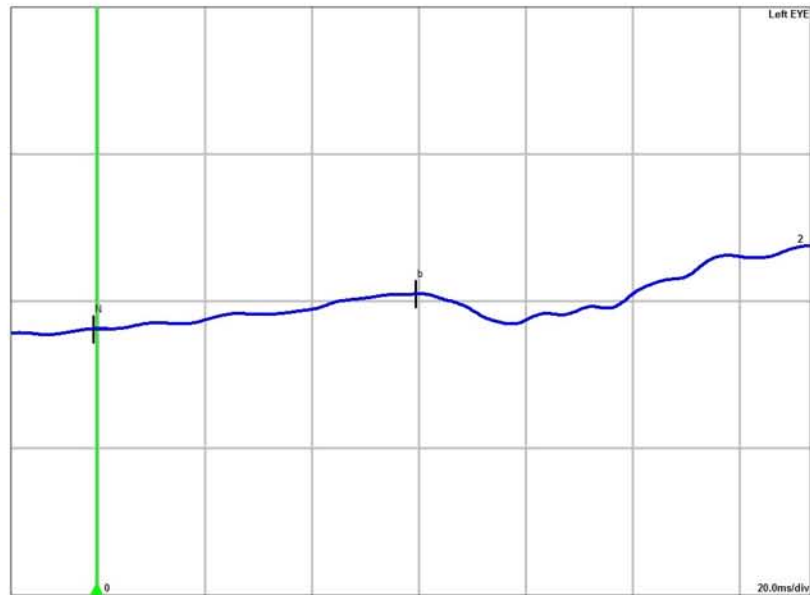

|         |           |              |
|---------|-----------|--------------|
| Normals | 67-91     | 95.0µV-305µV |
| Channel | b [ms]    | b-wave       |
| 1 L-1   | 129.2 (I) | 200µV        |
| 2 L-2   | 59.9 (I)  | 60.2µV (I)   |

**2\_Dark Adapted 3.0 ERG (GF)**

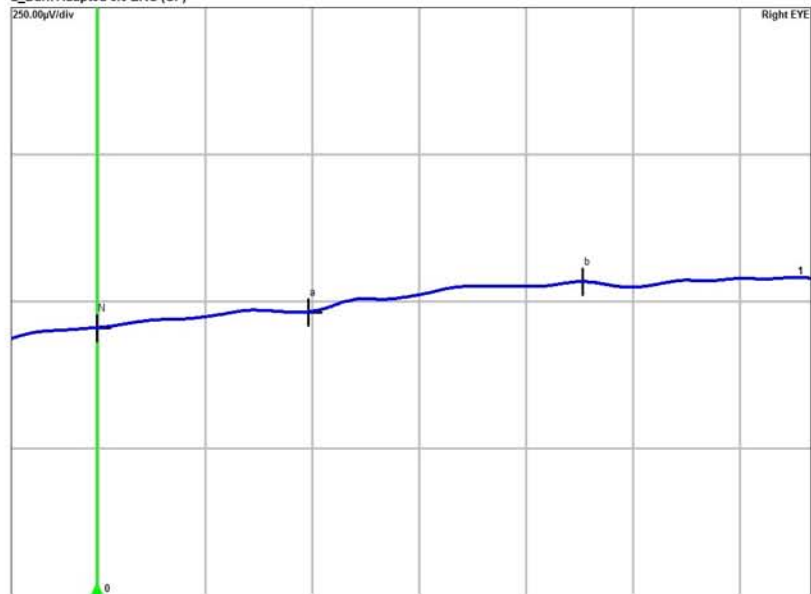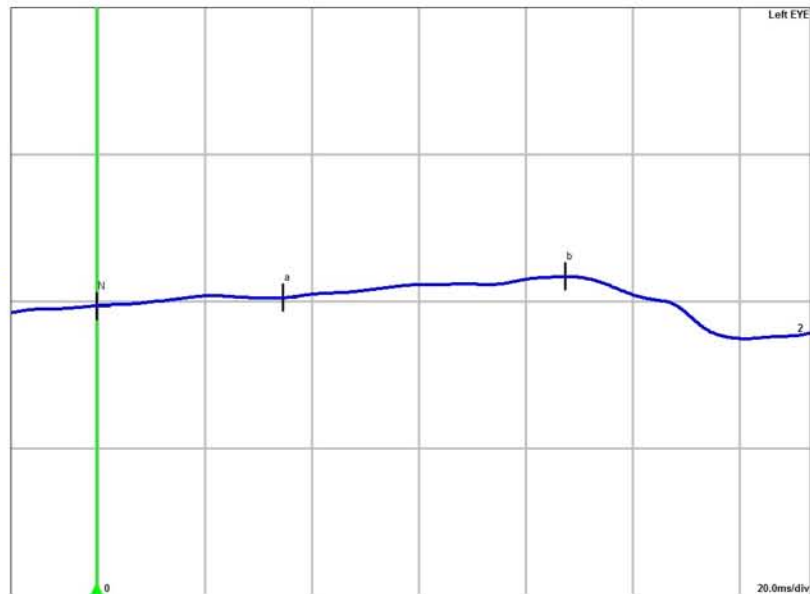

|         |          |          |             |             |           |
|---------|----------|----------|-------------|-------------|-----------|
| Normals | 14-22    | 33-46    | 155µV-358µV | 290µV-654µV | 1.50-2.60 |
| Channel | a [ms]   | b [ms]   | a-wave      | b-wave      | Da        |
| 1 L-1   | 38.6 (I) | 31.0 (I) | 27.1µV (I)  | 52.2µV (I)  | 1.93      |
| 2 L-2   | 34.9 (I) | 67.8 (I) | 14.4µV (I)  | 36.3µV (I)  | 2.51      |

# F1: IV-17

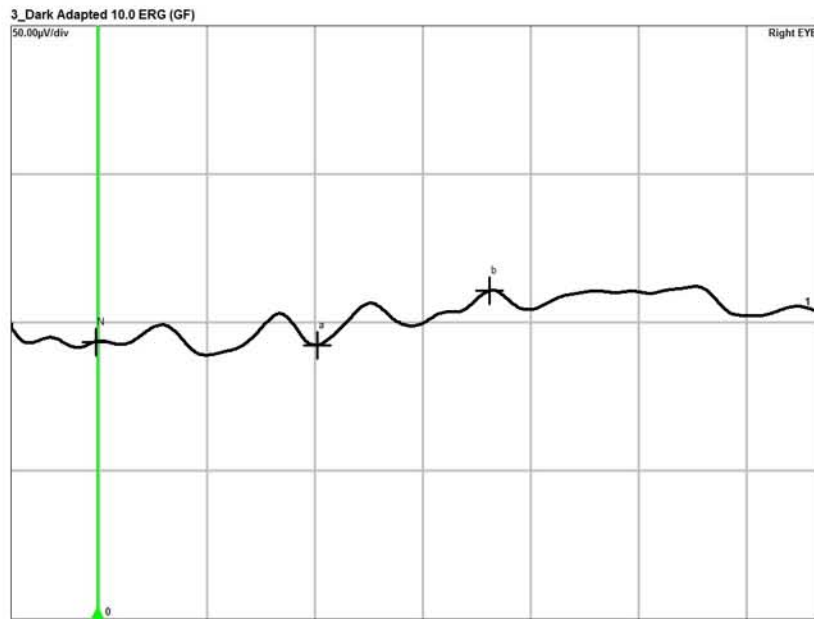

| Channel | a [ms] | b [ms] | a-wave |
|---------|--------|--------|--------|
| 1 R-1   | 40.8   | 72.8   | 1.22µV |
| 2 L-2   | 38.2   | 71.9   | 1.79µV |

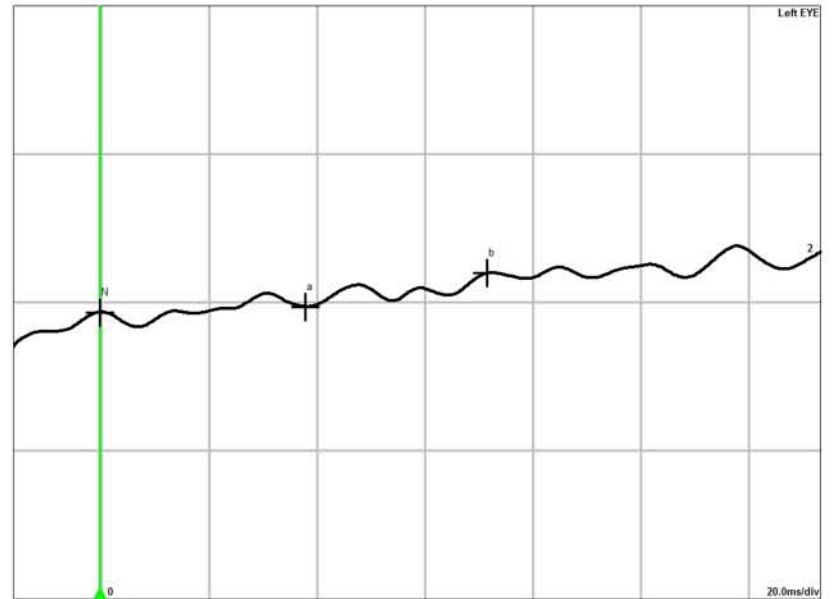

| b-wave |
|--------|
| 18.5µV |
| 11.6µV |

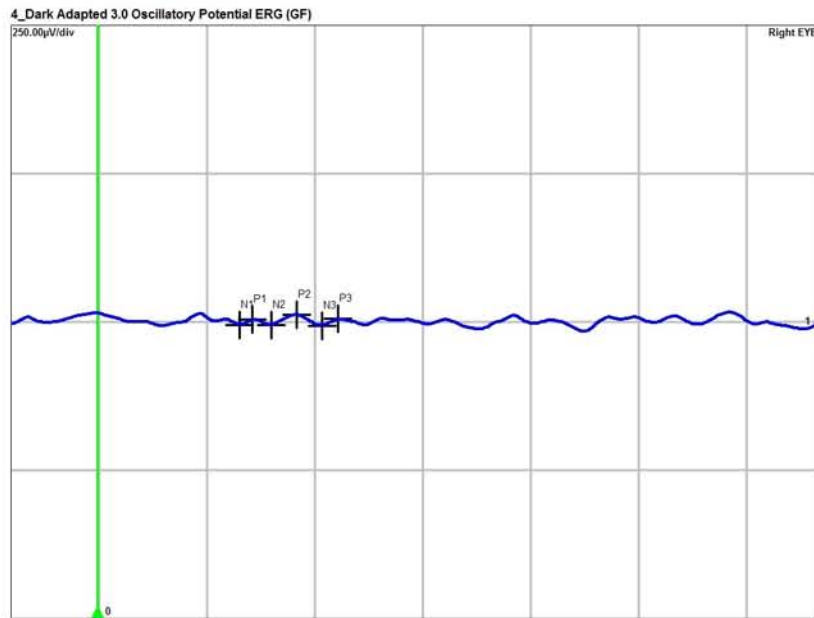

| Channel | P1 [ms] | N2 [ms] | P2 [ms]  | N3 [ms] | P3 [ms] |
|---------|---------|---------|----------|---------|---------|
| 1 R-1   | 28.8    | 32.3    | 37.0 (I) | 41.7    | 44.6    |
| 2 L-2   | 16.7    | 19.7    | 24.4 (I) | 31.7    | 37.0    |
| Normals |         |         | 22-24    |         |         |
| 1 R-1   | -       | -       |          | -       | -       |

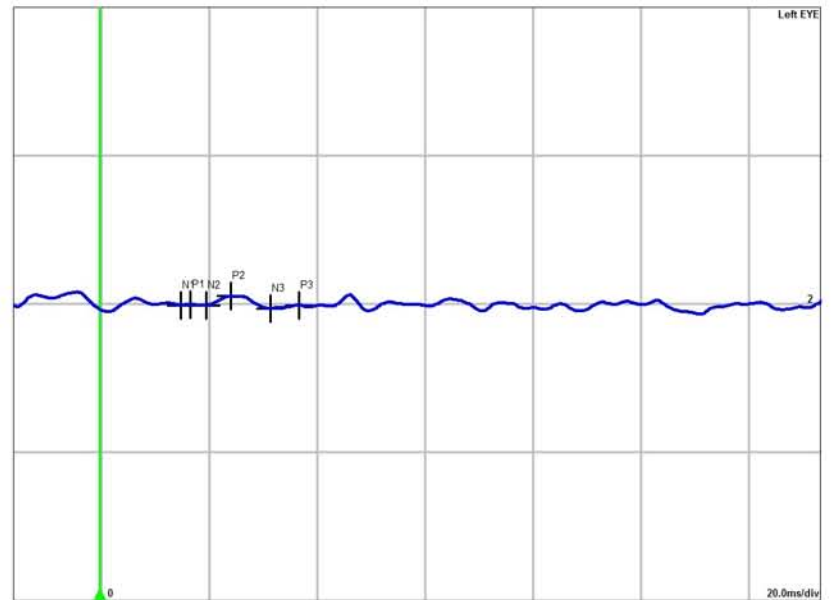

| OS1           | OS2    | OS3    | Sum OS |
|---------------|--------|--------|--------|
| 8.98µV (I)    | 17.8µV | 11.1µV | 37.9µV |
| 1.32µV (I)    | 16.0µV | 5.59µV | 22.9µV |
| 21.0µV-64.0µV |        |        |        |

# F1: IV-17

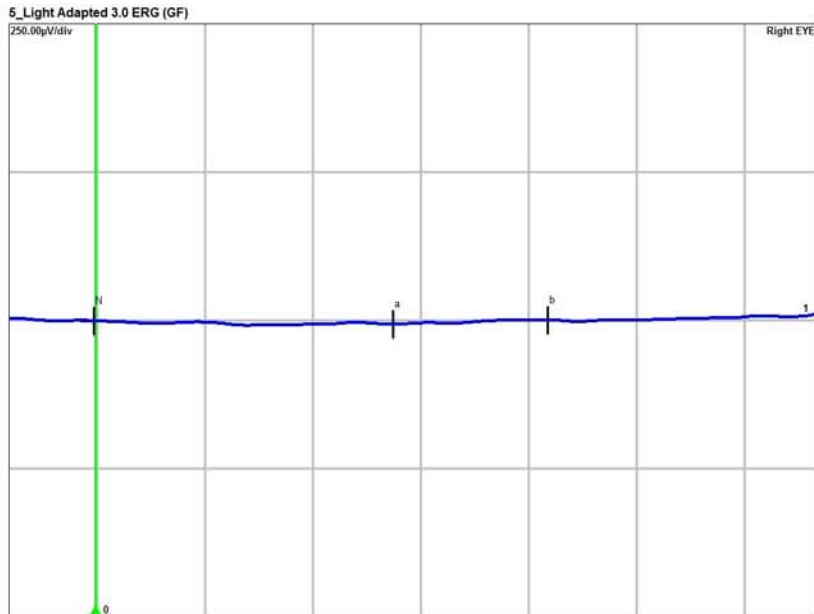

| Normals | 13-16    | 29-33    | 26.0µV-62.0µV |
|---------|----------|----------|---------------|
| Channel | a [ms]   | b [ms]   | a wave        |
| 1 R-1   | 55.2 (f) | 84.0 (f) | 5.60µV (f)    |
| 2 L-2   | 48.1 (f) | 65.2 (f) | 2.08µV (f)    |

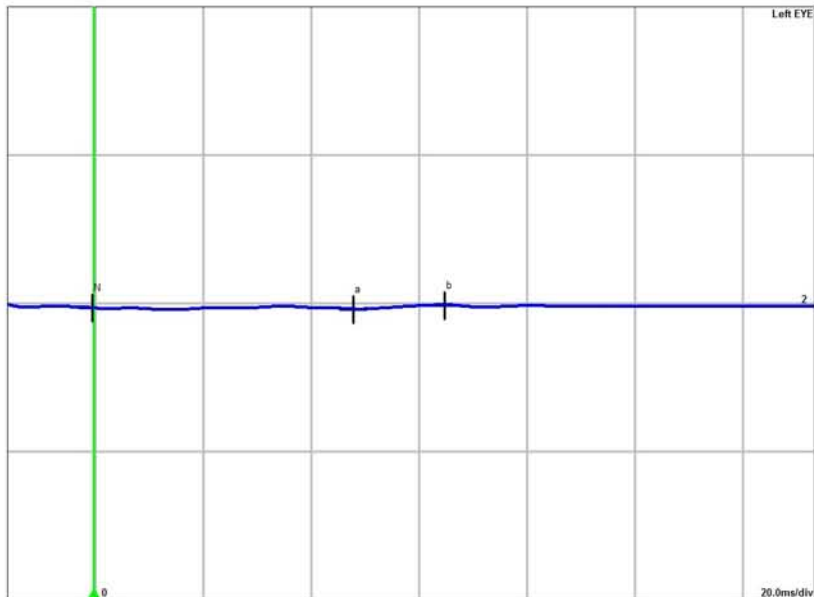

| 103µV-250µV |
|-------------|
| b wave      |
| 7.35µV (f)  |
| 6.98µV (f)  |

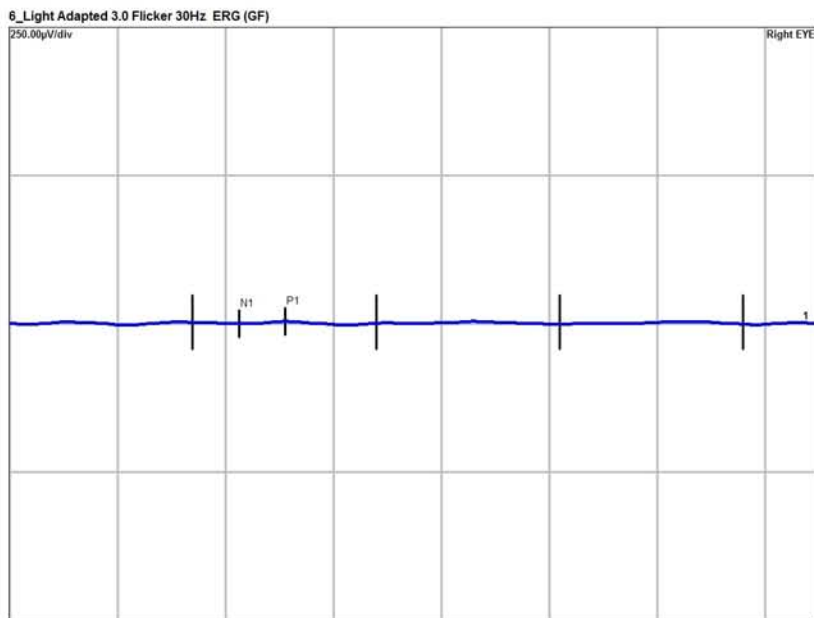

| Channel | P1 [ms]  | N1 - P1      | 30 Hz Amp |
|---------|----------|--------------|-----------|
| 1 R-1   | 51.4 (f) | 3.64µV (f)   | 1.07µV    |
| 2 L-2   | 61.9     | 7.94µV (f)   | 1.07µV    |
| Normals | 58-64    | 57.0µV-223µV |           |

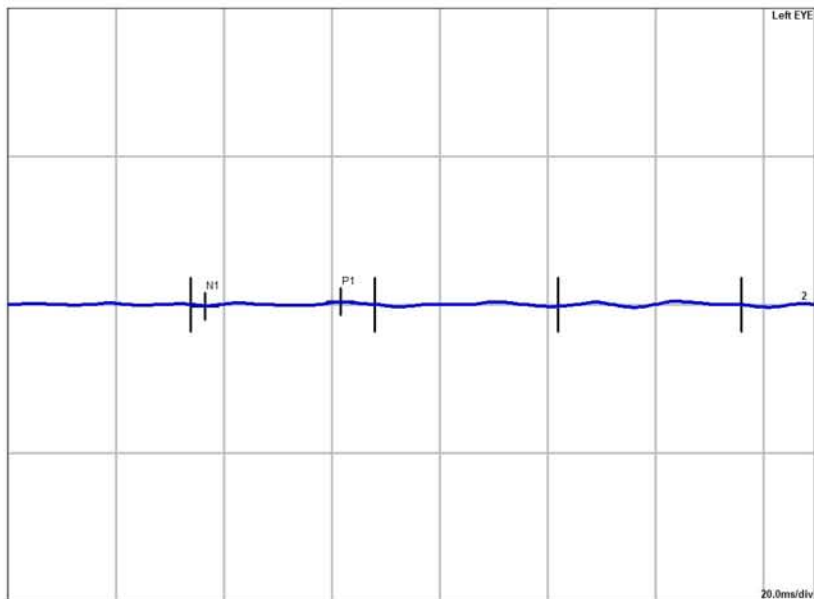

|        |
|--------|
| 1.07µV |
| 1.07µV |

# F1: IV-18

## Diagnosis: 1\_Dark Adapted 0.01 ERG (GF)

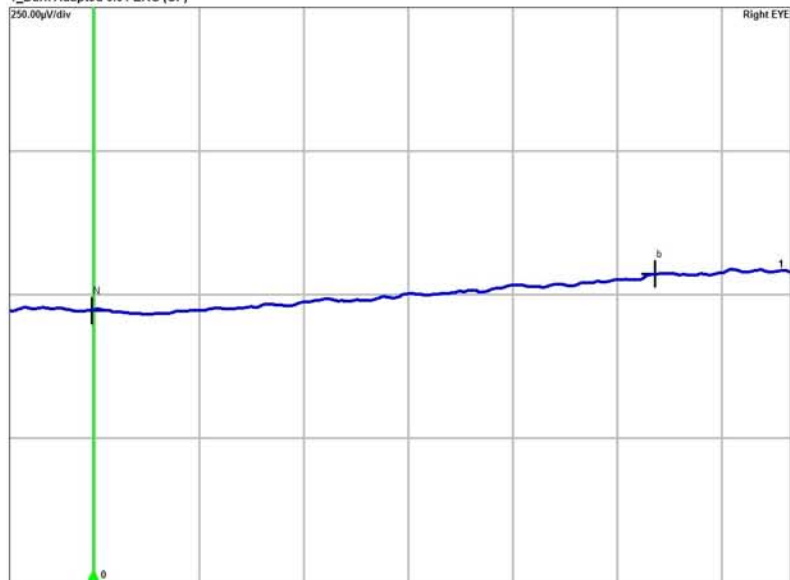

| Normals | 97-91     | 95.0µV-305µV |
|---------|-----------|--------------|
| Channel | b [ms]    | b-wave       |
| 1 R-1   | 107.7 (I) | 63.4µV (I)   |
| 2 L-2   | 100.7 (I) | 18.9µV (I)   |

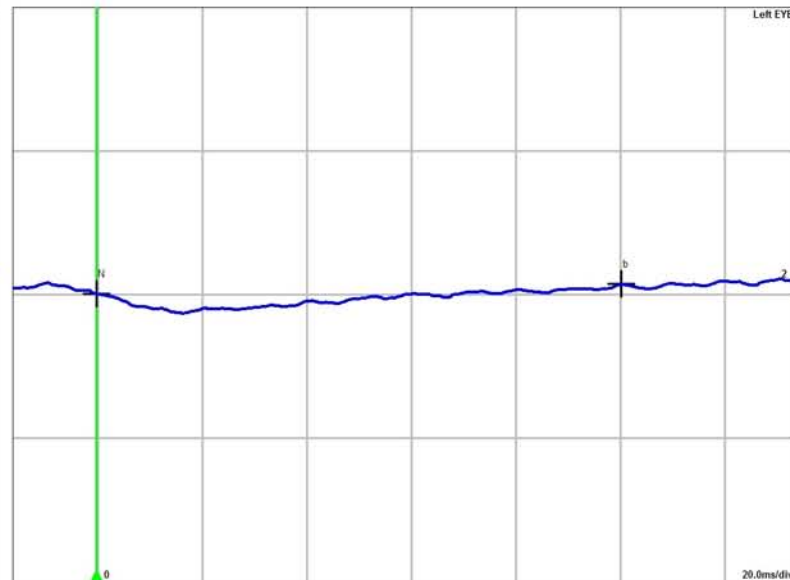

## 2\_Dark Adapted 3.0 ERG (GF)

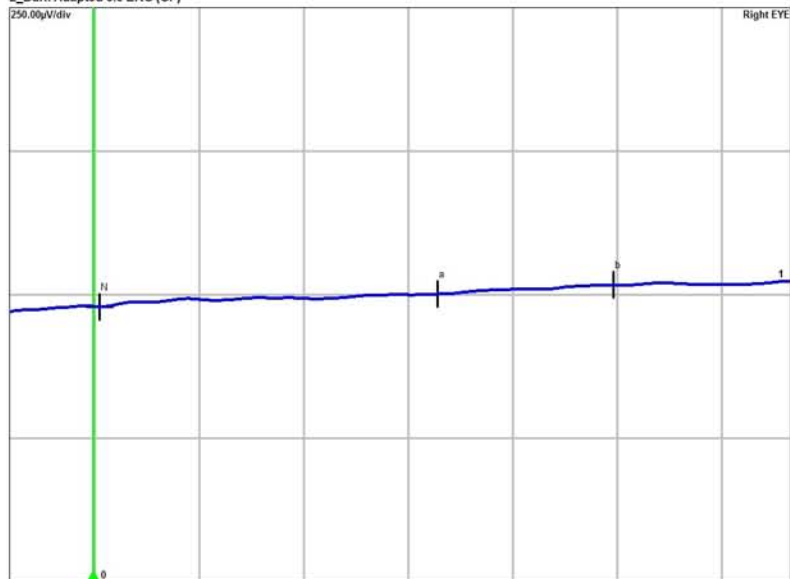

| Normals | 14-22    | 33-46    | 155µV-356µV |
|---------|----------|----------|-------------|
| Channel | a [ms]   | b [ms]   | a-wave      |
| 1 R-1   | 66.9 (I) | 99.8 (I) | 23.2µV (I)  |
| 2 L-2   | 40.8 (I) | 77.5 (I) | 9.19µV (I)  |

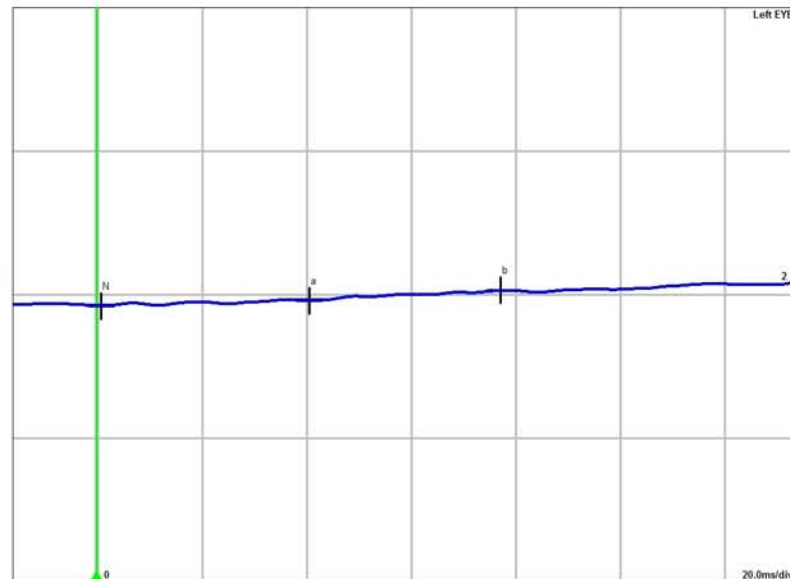

| Normals | 290µV-654µV | 1.50-2.60 |
|---------|-------------|-----------|
| Channel | b-wave      | b/a       |
| 1 R-1   | 15.5µV (I)  | 0.967 (I) |
| 2 L-2   | 17.7µV (I)  | 1.93      |

# F1: IV-18

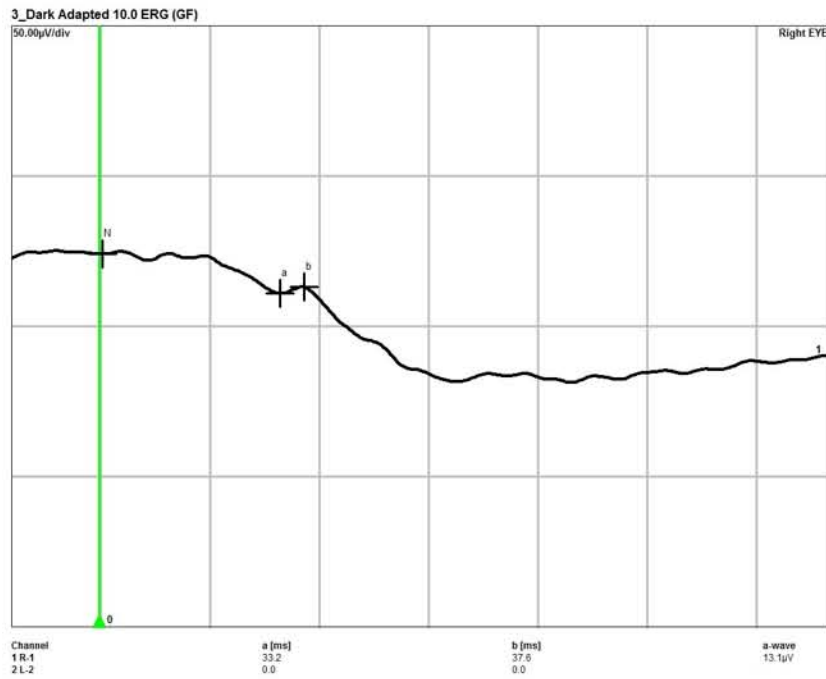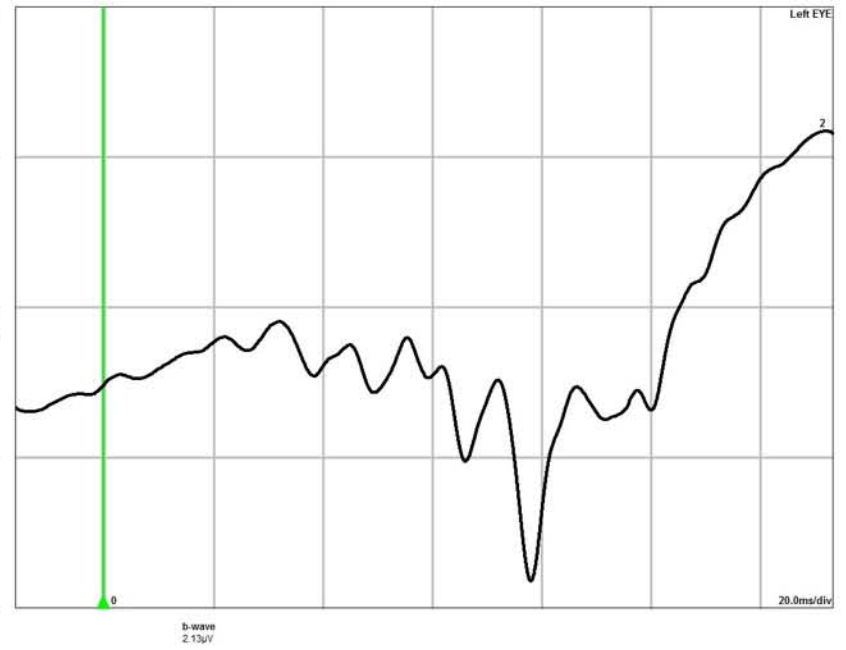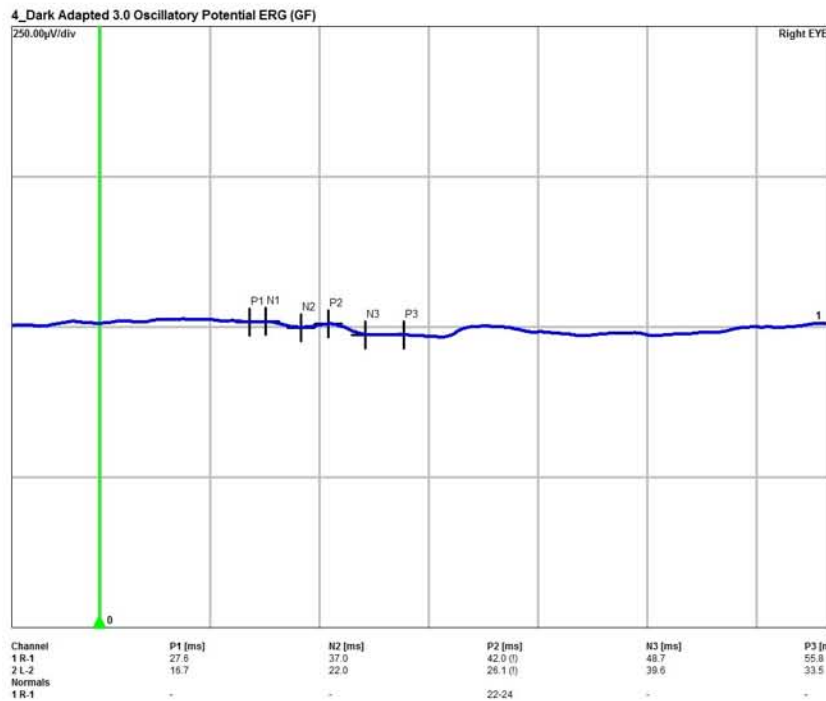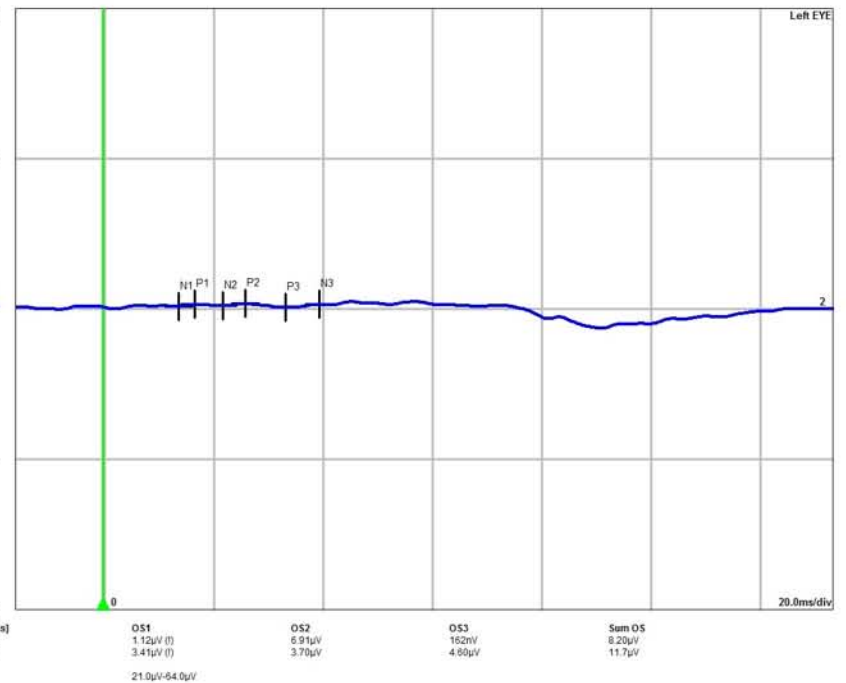



# F1: IV-18

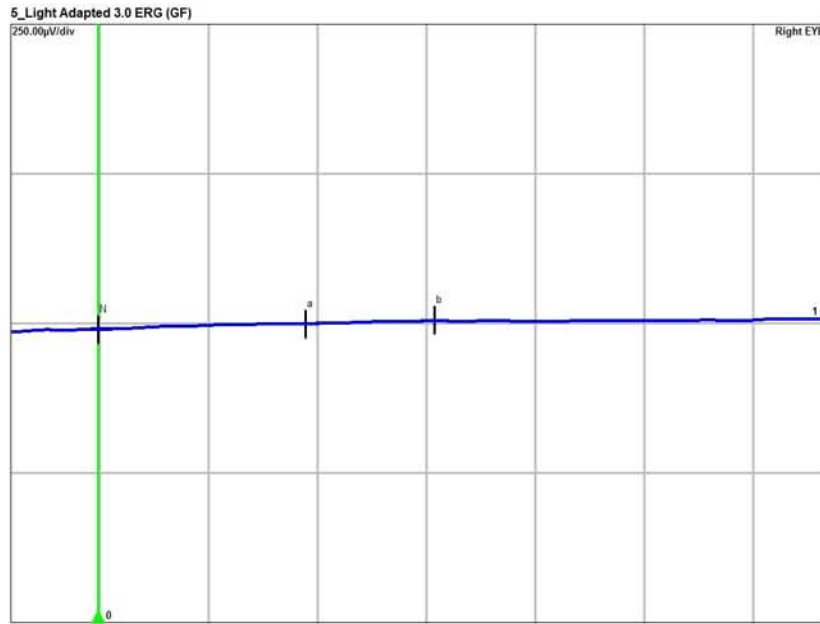

| Normals | 13-18    | 25-33    | 25.0µV-62.0µV |
|---------|----------|----------|---------------|
| Channel | a [ms]   | b [ms]   | a-wave        |
| 1 R-1   | 38.2 (I) | 61.9 (I) | 8.65µV (I)    |
| 2 L-2   | 37.9 (I) | 72.8 (I) | 10.2µV (I)    |

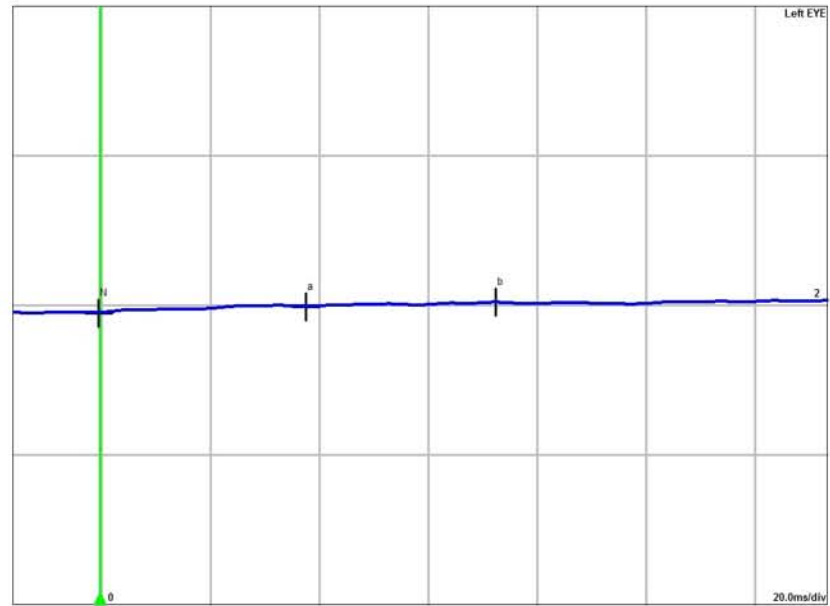

| 10.0µV-250µV |
|--------------|
| b-wave       |
| 6.86µV (I)   |
| 8.10µV (I)   |

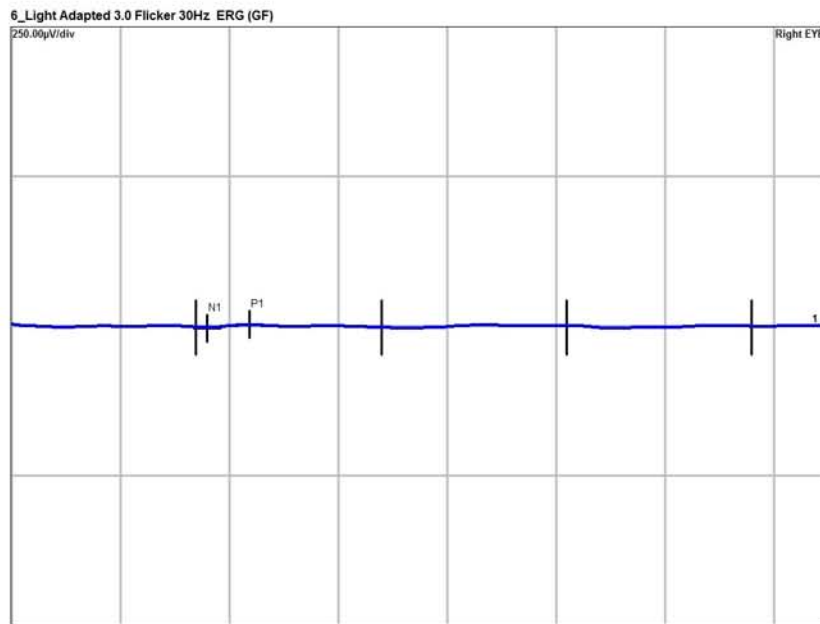

| Channel | P1 [ms]  | N1 - P1      | 30 Hz Amp |
|---------|----------|--------------|-----------|
| 1 R-1   | 44.0 (I) | 5.78µV (I)   | 902µV     |
| 2 L-2   | 46.7 (I) | 1.74µV (I)   | 769µV     |
| Normals | 58-64    | 57.0µV-223µV |           |
| 1 R-1   |          |              |           |

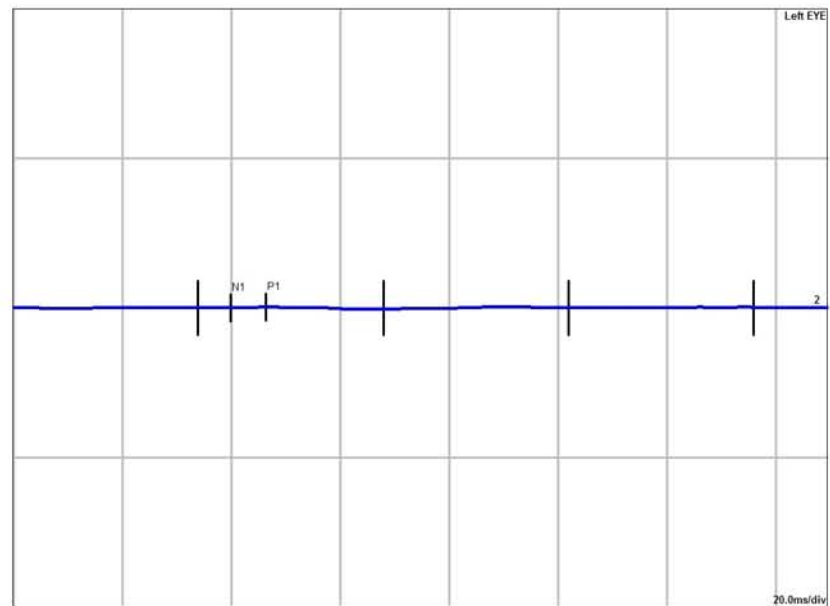

# F1: V-6

## Diagnosis: 1\_Dark Adapted 0.01 ERG (GF)

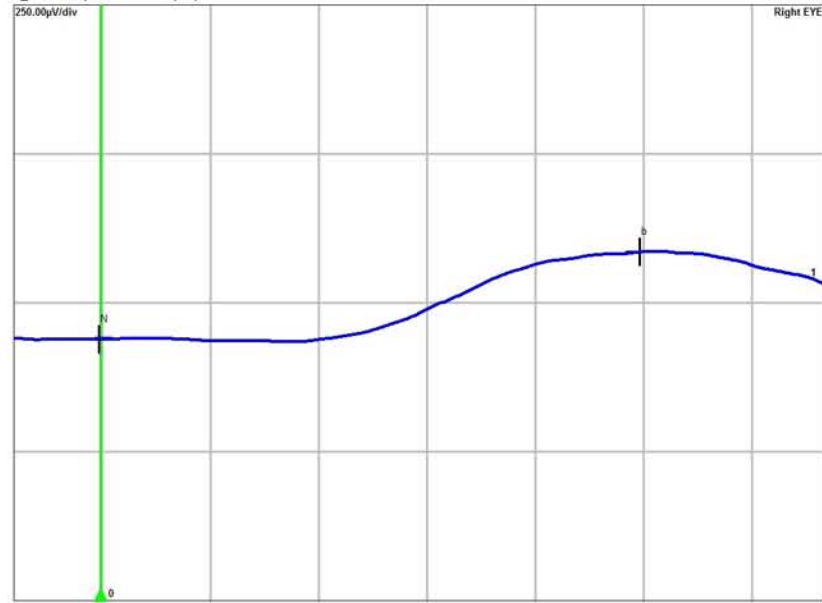

| Normals | 67-91    | 95.0µV-305µV |
|---------|----------|--------------|
| Channel | b [ms]   | b-wave       |
| 1 R-1   | 99.8 (I) | 145µV        |
| 2 L-2   | 79.0     | 280µV        |

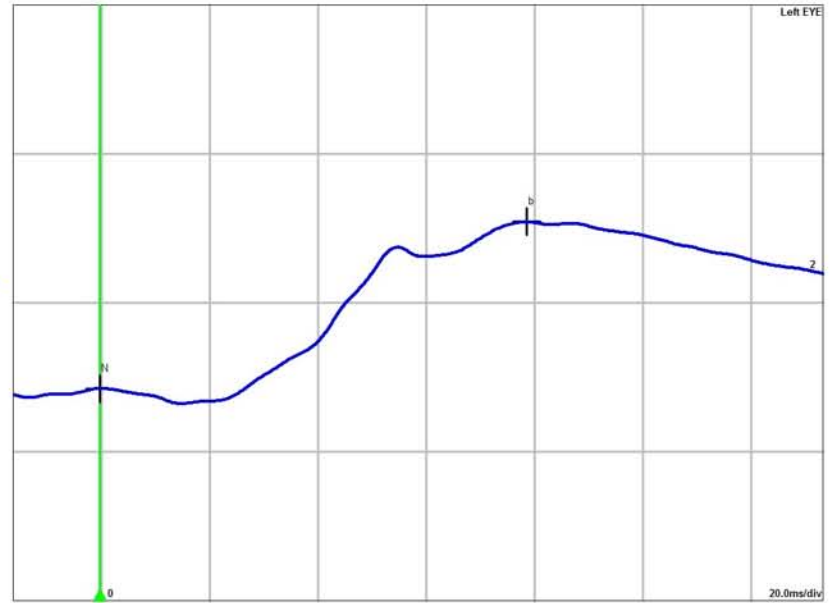

## 2\_Dark Adapted 3.0 ERG (GF)

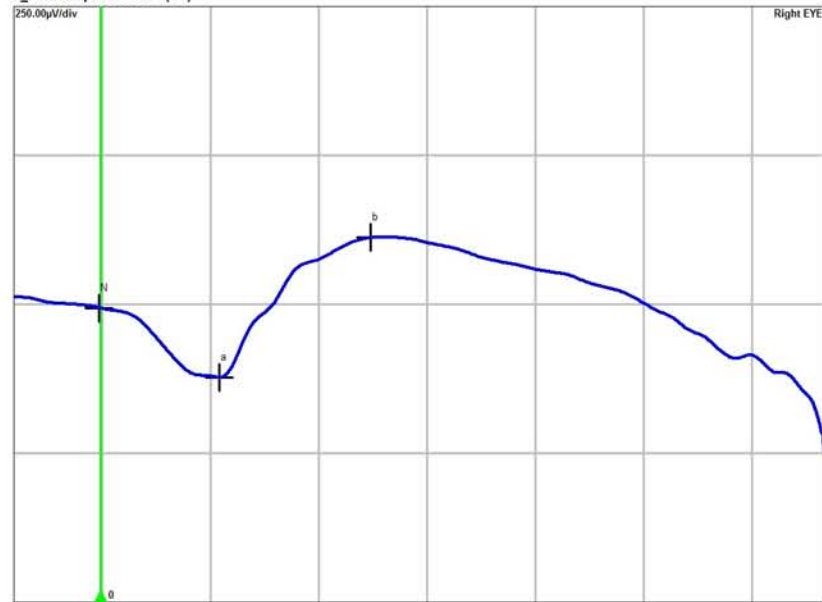

| Normals | 14-22    | 33-46    | 155µV-356µV |
|---------|----------|----------|-------------|
| Channel | a [ms]   | b [ms]   | a-wave      |
| 1 R-1   | 22.9 (I) | 49.9 (I) | 117µV (I)   |
| 2 L-2   | 22.3 (I) | 49.3 (I) | 87.6µV (I)  |

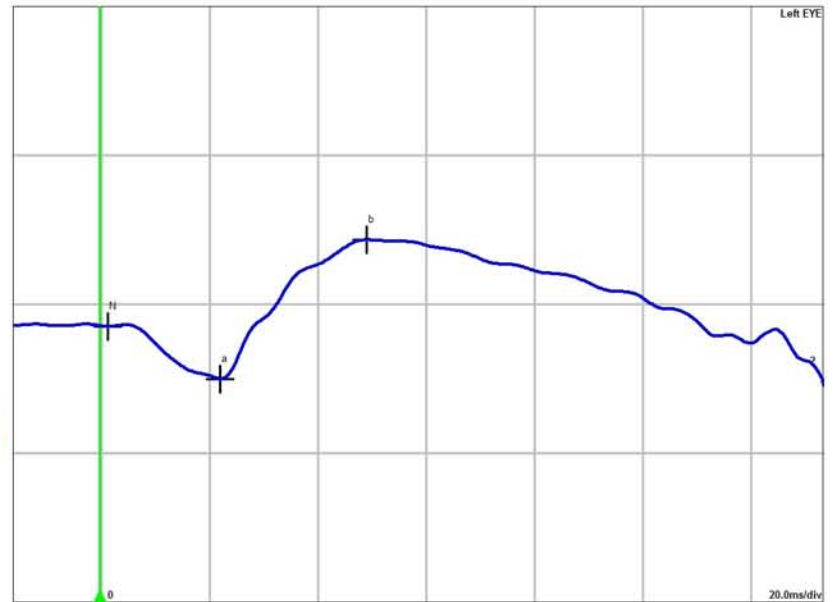

| Normals   | 290µV-654µV | 1.50-2.60 |
|-----------|-------------|-----------|
| b-wave    | b-wave      | b/a       |
| 235µV (I) | 234µV (I)   | 2.81      |
| 234µV (I) |             | 2.67      |
