# Supplementary material for: Extending the spectrum of CLRN1‐ and ABCA4‐associated inherited retinal dystrophies caused by novel and recurrent variants using exome sequencing
Source: PubMed Central journal article supplement — Mol Genet Genomic Med. 2020 Jan 22;8(3):e1123. doi: 10.1002/mgg3.1123 (PMC7057102; doi:10.1002/mgg3.1123), 2020-01-22
Supplement: MGG3-8-e1123-s007.pdf [file MGG3-8-e1123-s007.pdf]

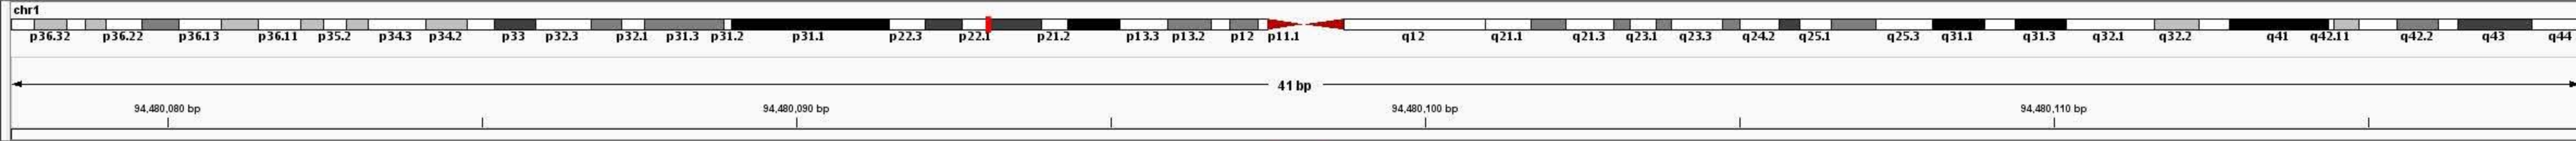

2B-020507-C0...bam Coverage

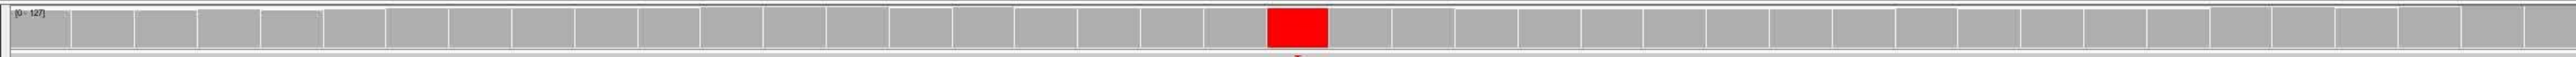

# F1A & F4

## ABCA4 (c.5460+1G>A)

2B-020507-C01\_AACGTGAT-16  
01411-0459-AHFFGKBCXY.clear  
m

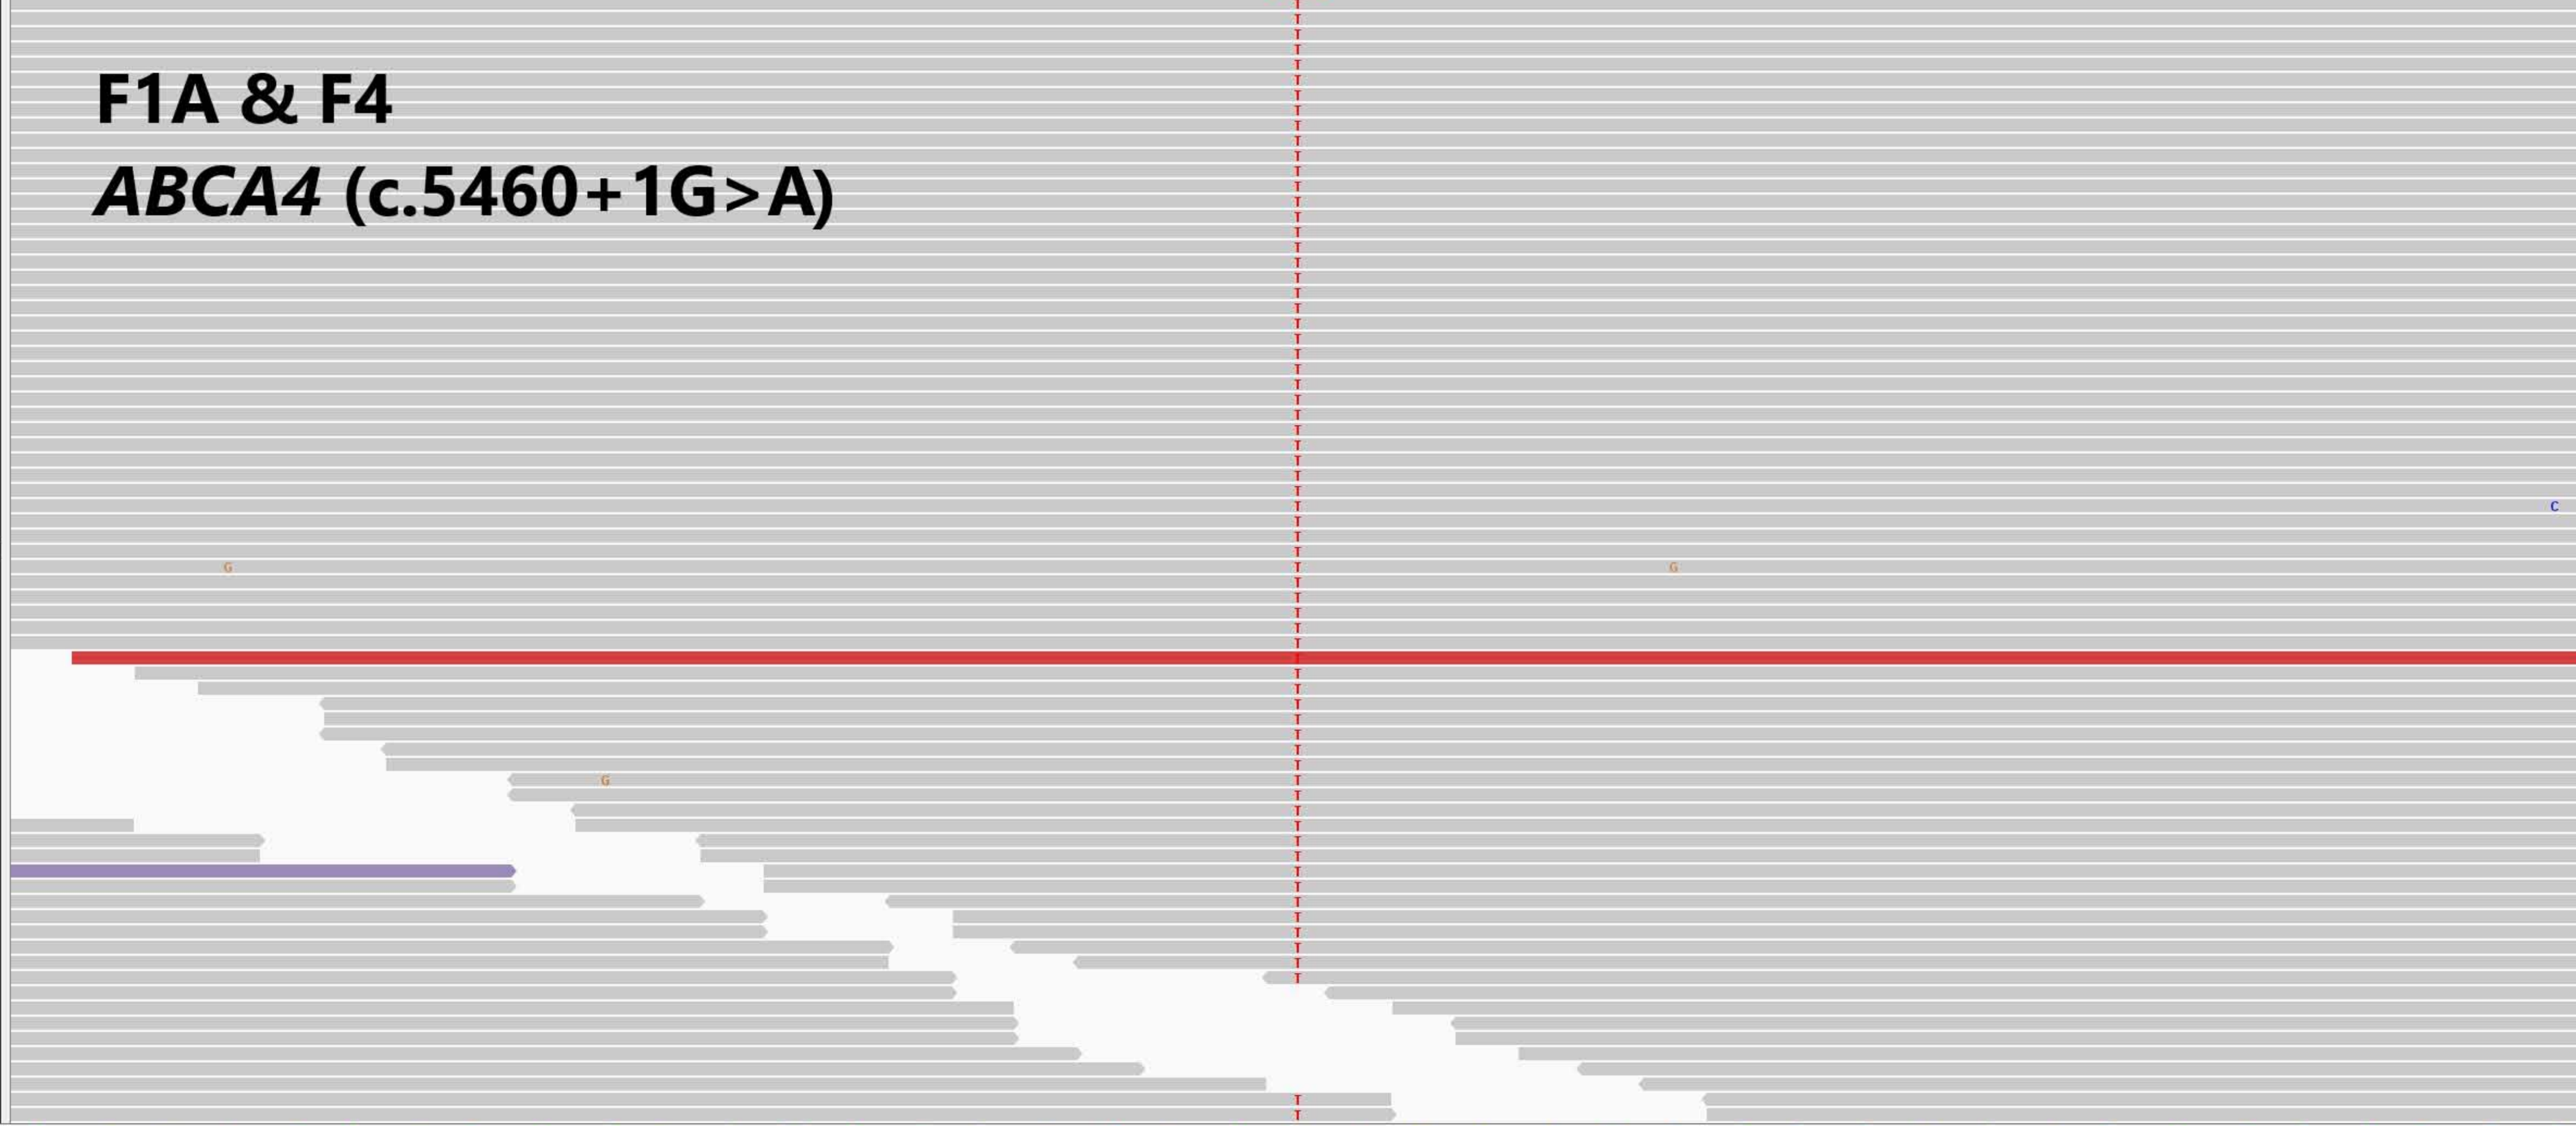

Sequence →

A G C C A A G A A G T T A T G C T C A C C C G G T T A T T C T C A A A T A A T T

RefSeq Genes

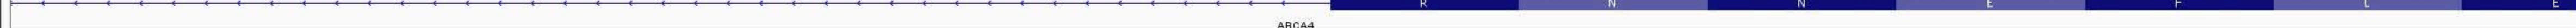

ABCA4

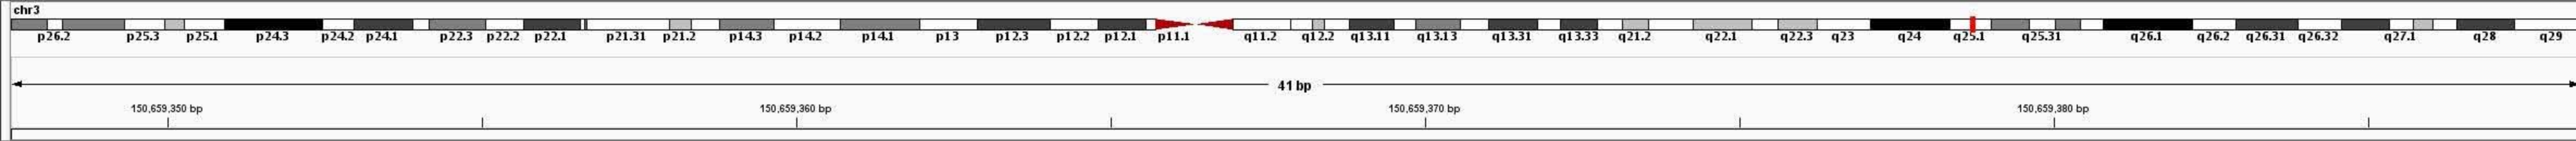

2A-020416-B0...bam Coverage

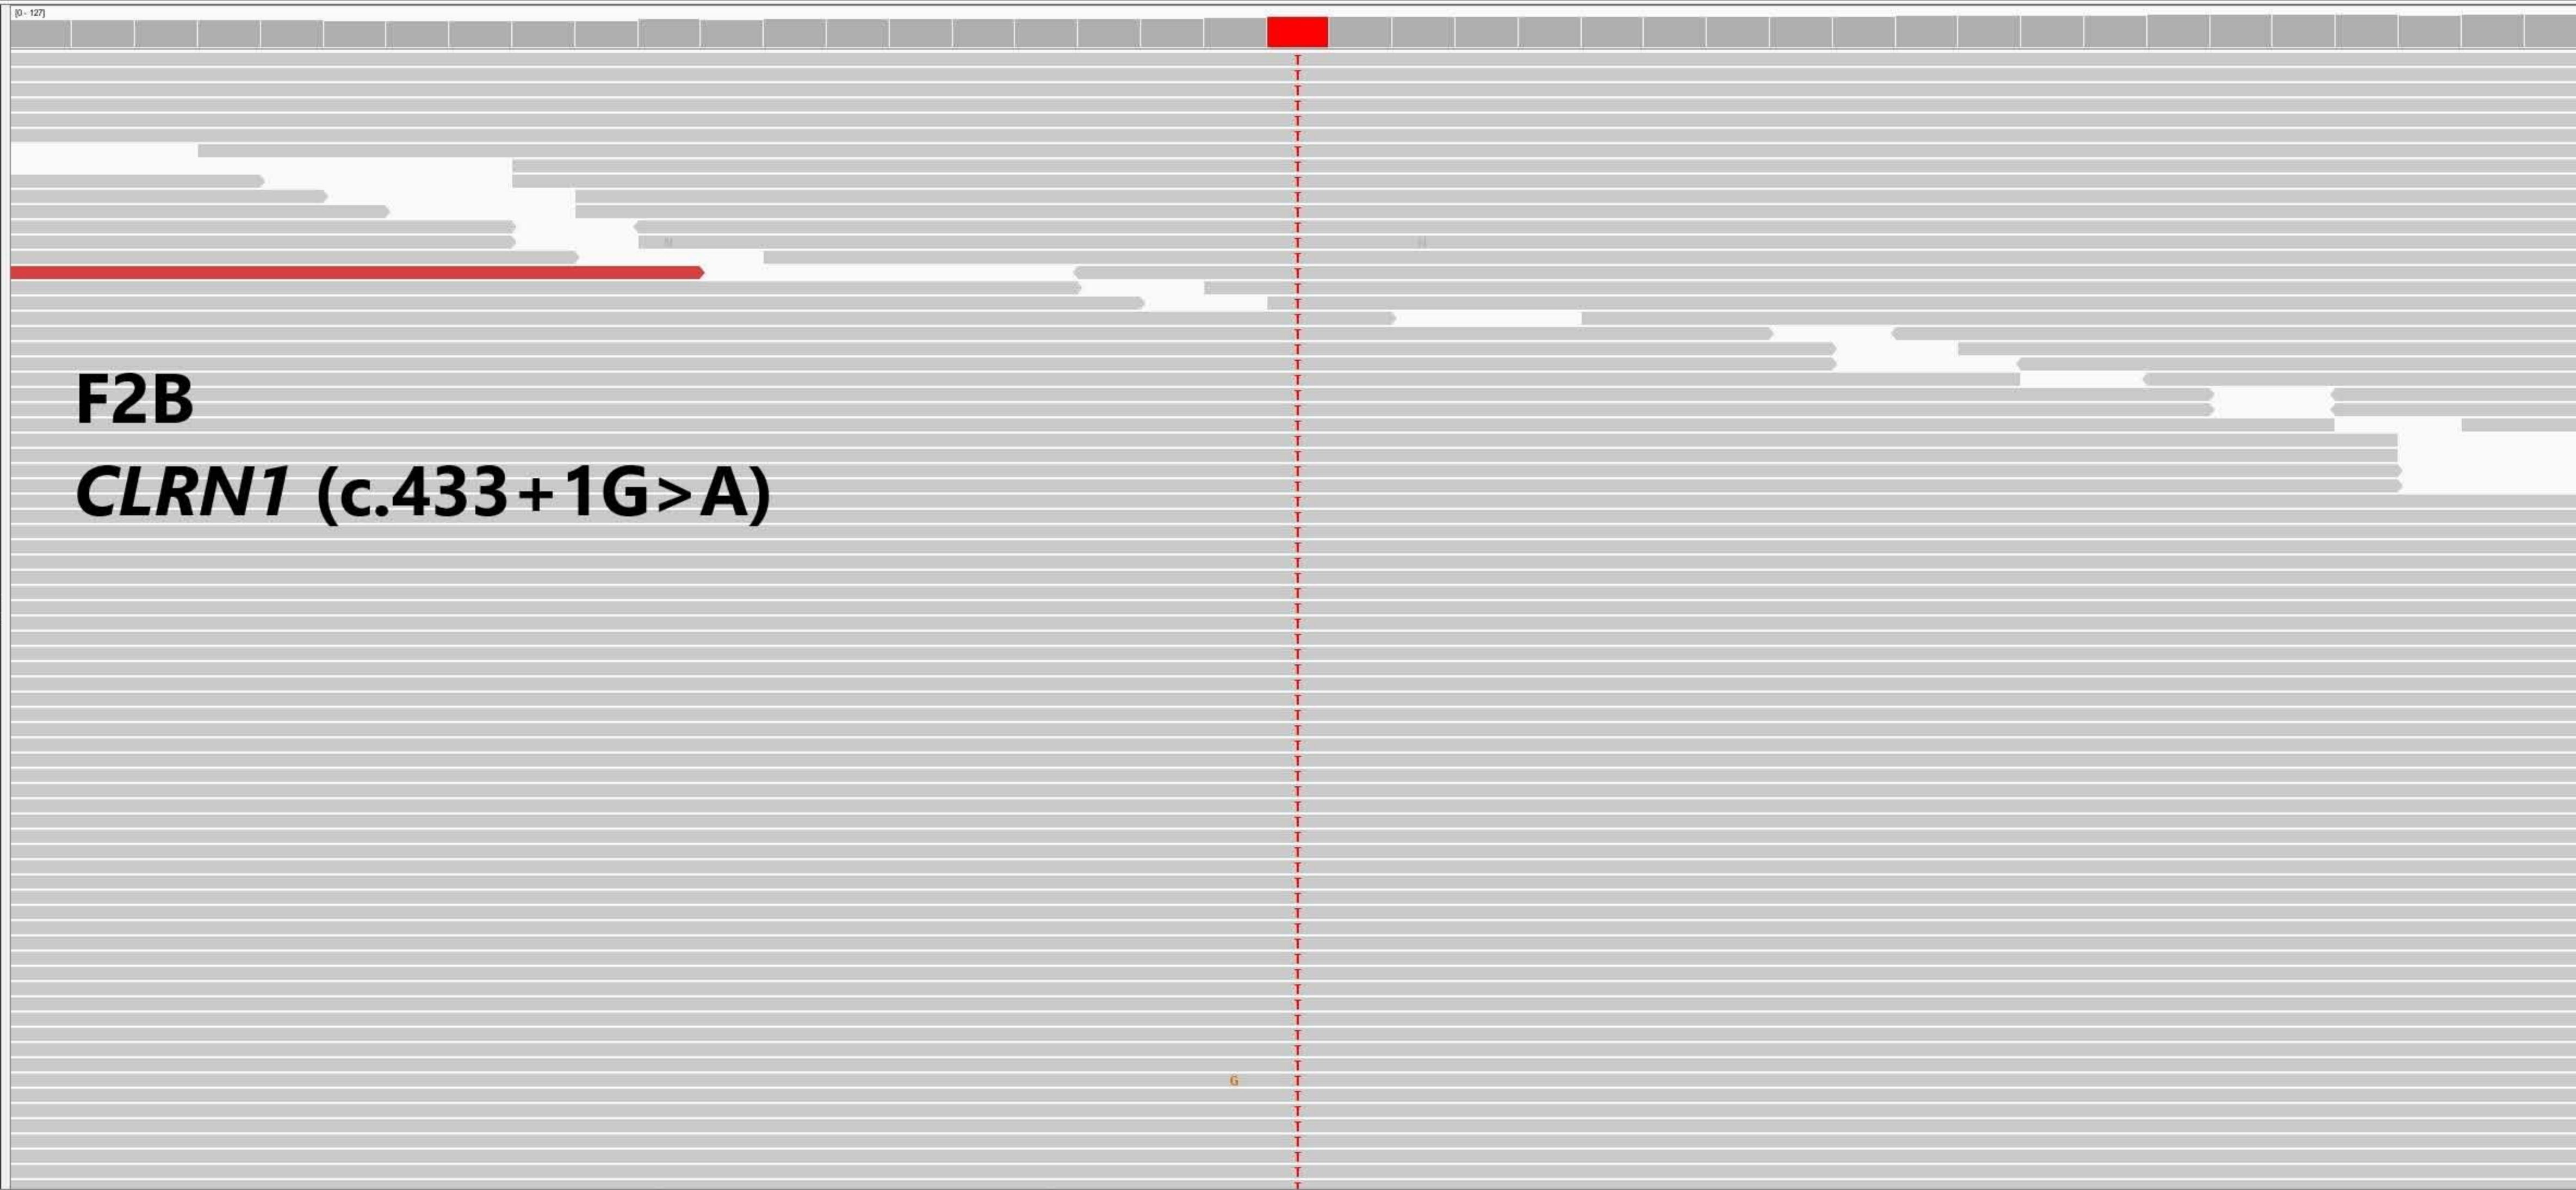

**F2B**  
***CLRN1* (c.433+1G>A)**

2A-020416-B01\_GAATCTGA-10  
01411-0450-AHFFGKBCXY.clear  
m

Sequence →  
RefSeq Genes

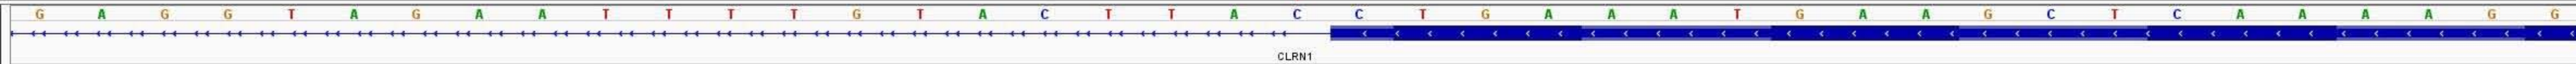

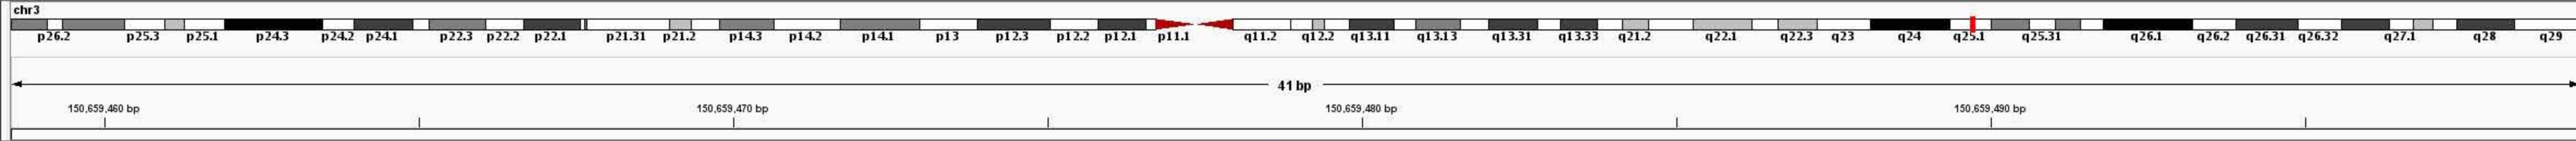

36-360203-E0...bam Coverage

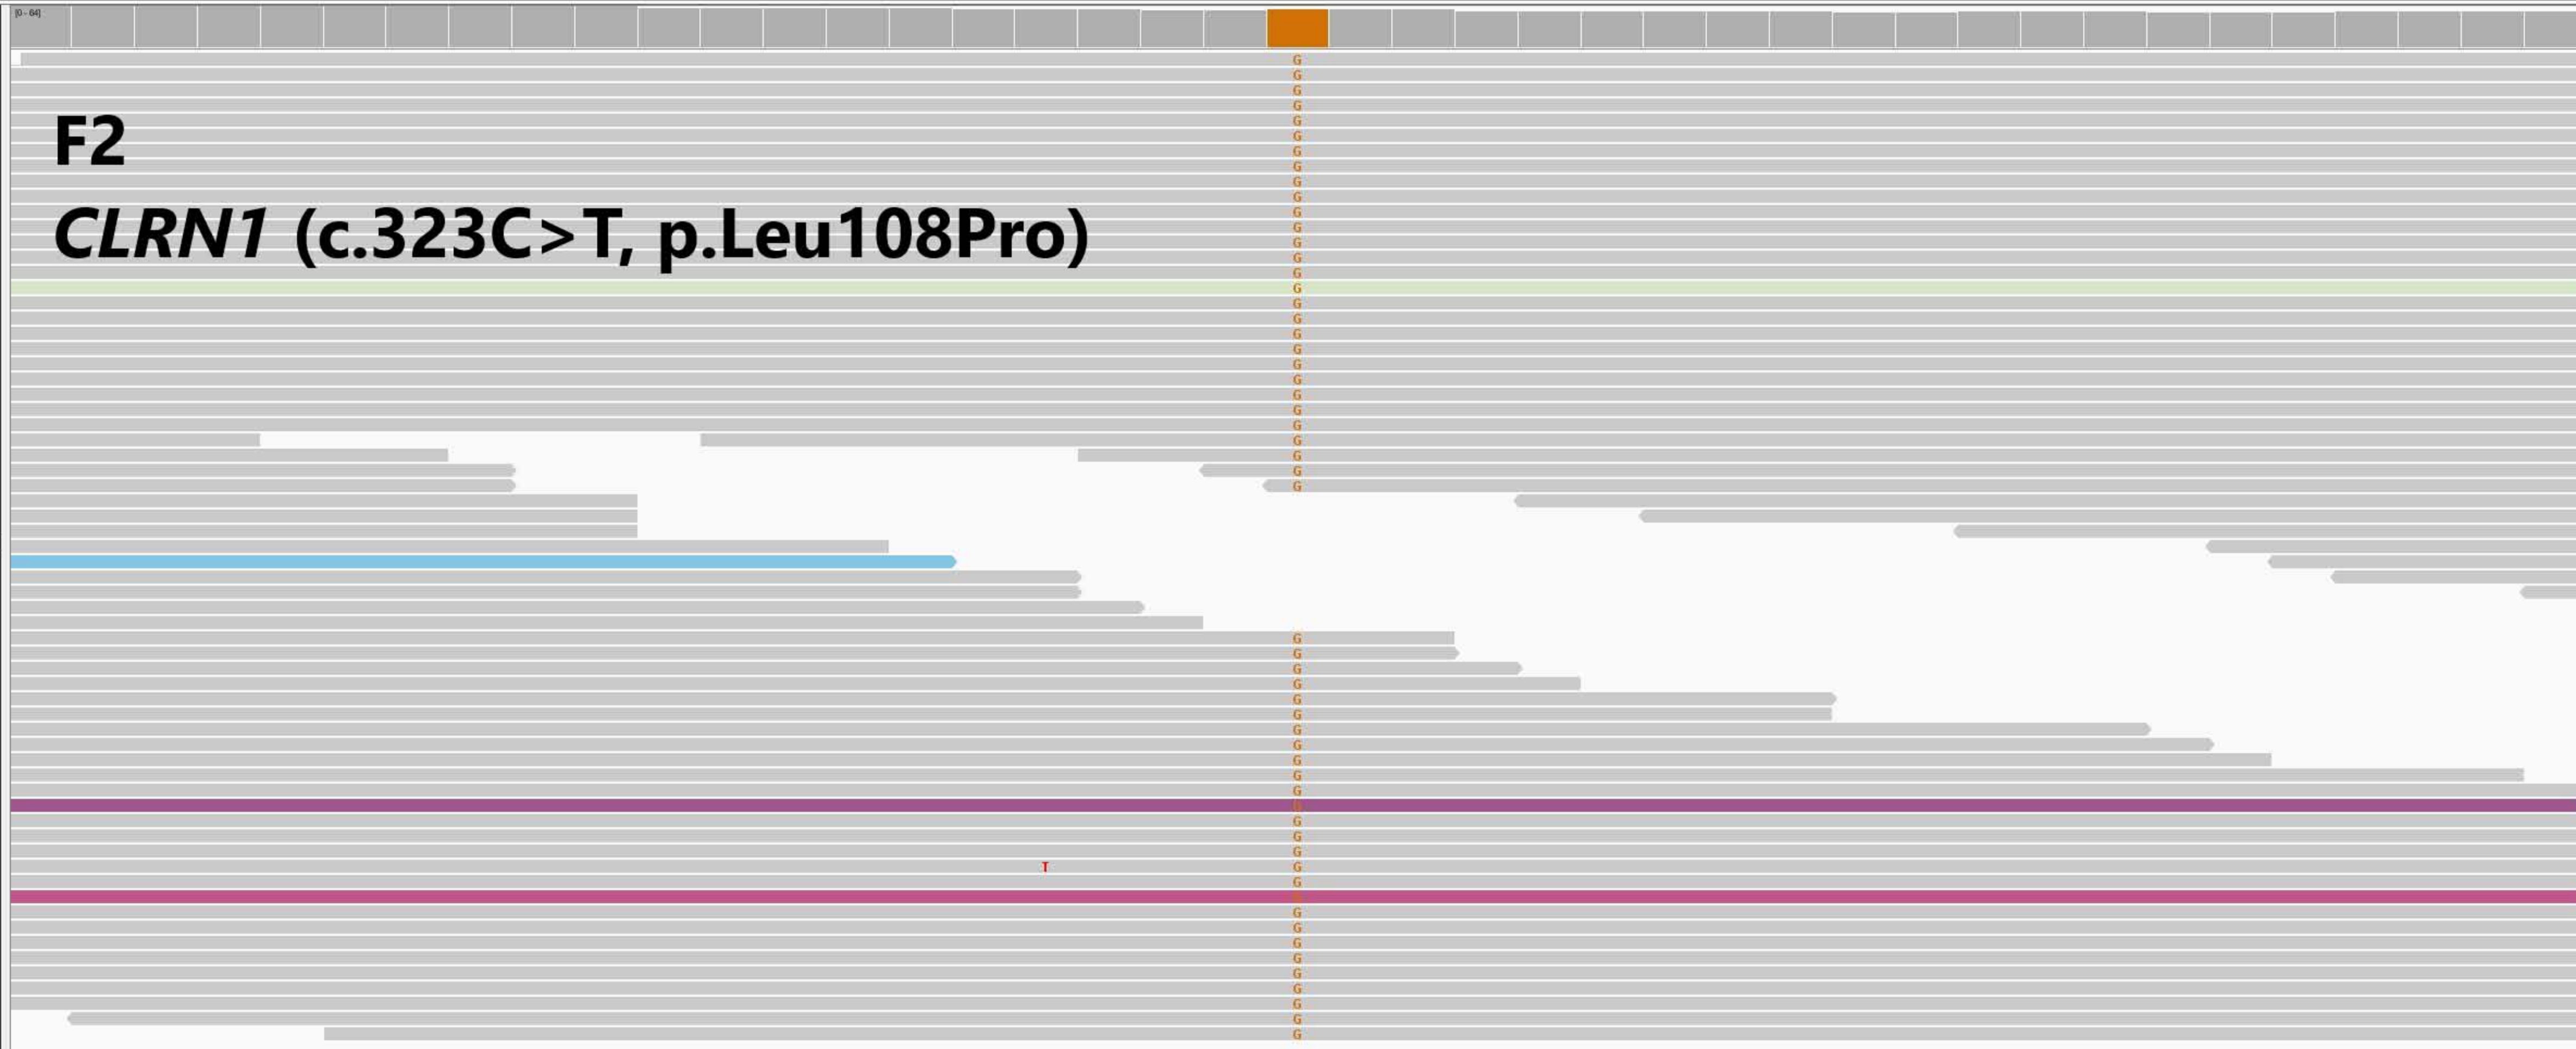

36-360203-E05\_CGCTGATC-17C  
01411-0481-AHFGFVBCXY.clear  
m

Sequence →  
RefSeq Genes

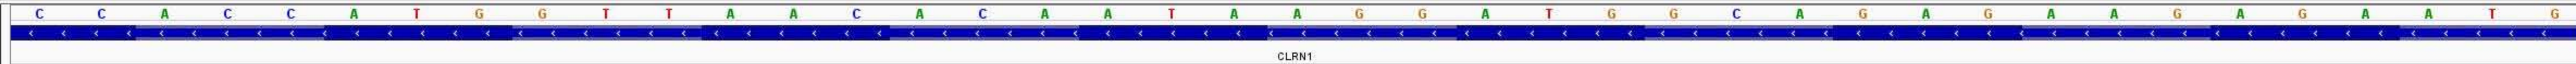

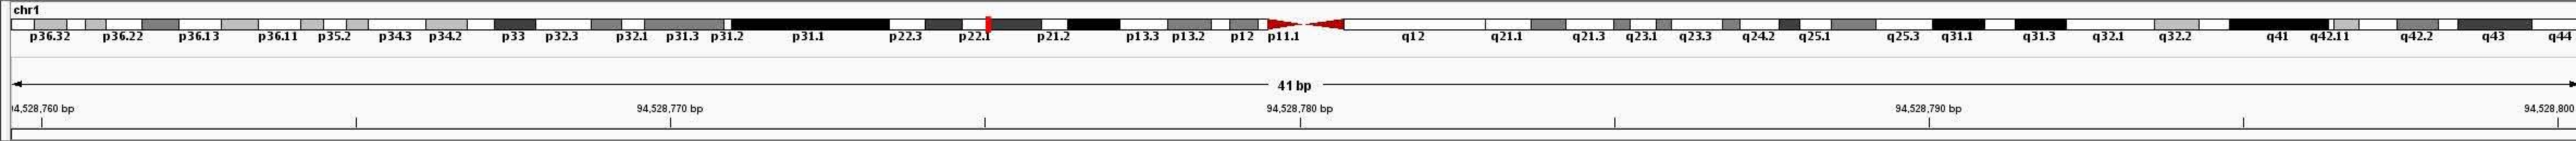

24-240405-AD...bam Coverage

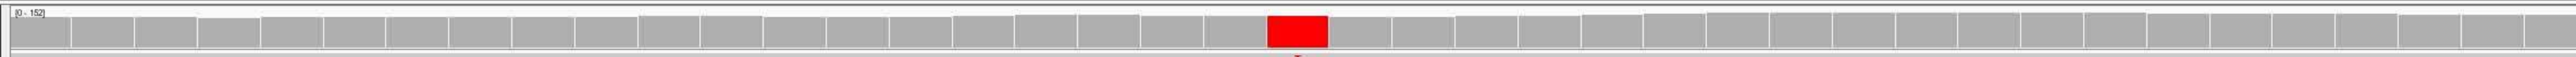

# F3

## ABCA4 (c.1648G>A, p.Gly550Arg)

24-240405-A04\_AACTCACC-101  
01411-0463-AHG2M3BCXY.clea  
m

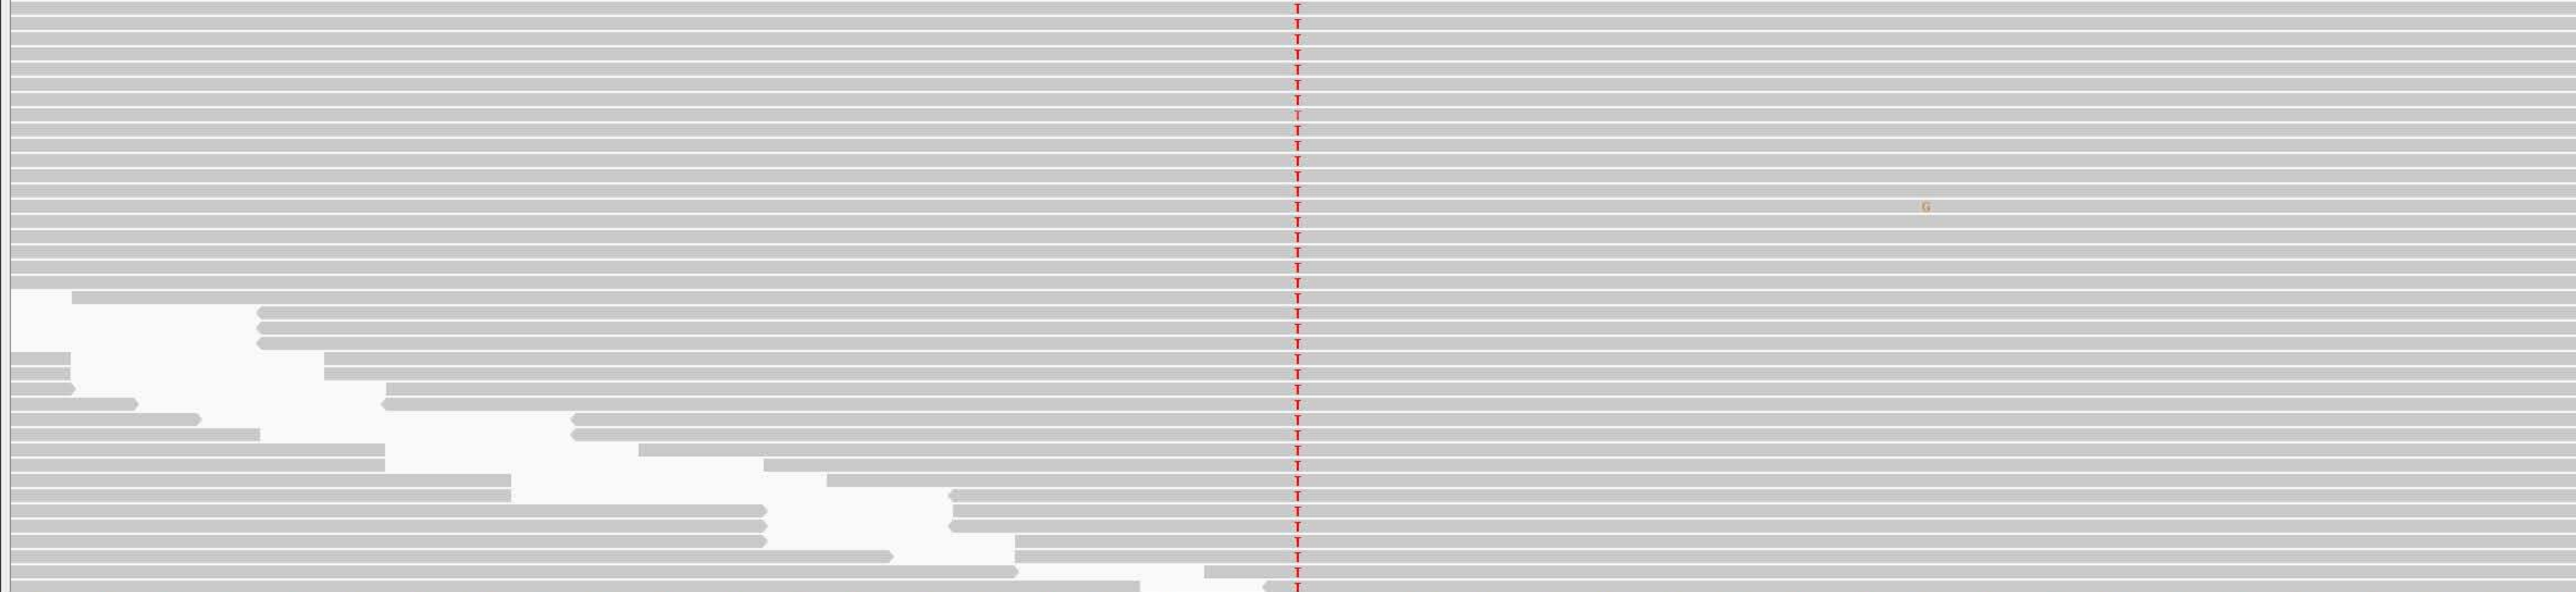

Sequence →  
RefSeq Genes

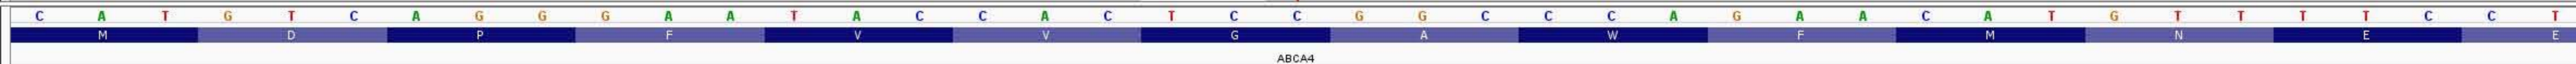

ABCA4
